# Supplementary material
Source: MDPI journal article supplement (https://www.mdpi.com/2571-6255/6/3/107)
Supplement: s1 [file s1]

Archive with 2 entries (2 files):
- Supplement File S1.xlsx
- Supplement File S2.pdf
