# Supplementary material
Source: MDPI journal article supplement (https://www.mdpi.com/2571-6255/6/3/107)
Supplement: s1 [file s1 › Supplement File S1.xlsx]

## Sheet: Supplementary File 1
BlockID	Area_HA	Population density	Household size	Old age ratio	The ratio of the 14-year-old group and lower	Disability ratio	Illiteracy rate	Previous fires rate	Residential units’ density	The ratio of buildings made of non-durable materials	The ratio of small-sized property units ‌	The ratio of older buildings older than 30 years	High-rise buildings ratio	The ratio of worn-out and demolishing buildings	The degree of permeability of the urban texture	Mixed land-use	Distance from the hydrant valves	Distance from fire stations	Buildings density with high fire incidence potential	Unemployment rate
1	0.00780766	13.3	3.714	2.885	18.269	0	0	10.8466	35.8622	0	0	0	28.57	0	0	0	2021.31	1849.06	2.53825	0.379075
2	0.00338868	33.3	3.324	0	20.354	0	1.89873	107.479	100.334	1.852	0	0	9.09	0	0	0	2051.94	1847.36	2.53818	0
3	0.000614505	0	0	0	0	0	6.32911	0	0	3.333	0	0	0	0	0	0	2118.72	1917.32	2.45056	0
4	1.20686e-05	0	0	0	0	0	4.25532	0	0	3.03	0	0	0	0	0	0	2077.58	1955.39	2.53824	0
5	0.00474615	54.8	3.377	0.385	20.385	0	7.43802	6.05262	162.237	7.895	0	0	0	0	0	0.11	2216.4	1988.31	2.42108	1.13723
6	0.00421329	42.7	3.273	1.111	23.333	0	2.5974	7.82655	128.166	3.774	0	0	0	0	0	0	2131.17	1881.49	2.47441	0
7	0.00293706	45.6	3.526	2.985	18.657	0	4.8951	9.41284	129.381	0	0	0	0	0	0	0	2162	1881.83	2.45644	2.65353
8	0.005691	68.2	3.56	0.258	25.515	0	5.12821	4.44181	191.53	0	0	0	0	0	0	0	2246.61	1989.26	2.32769	0.379075
9	0.003582	47.7	3.717	1.754	19.883	0	2.67857	8.09341	128.42	1.835	0	0	0	0	0	0	2289.67	1957.65	2.33066	1.5163
10	1.20686e-05	0	0	0	0	0	0	0	0	0	0	0	0	0	0	0	2255.29	1886.84	2.33066	0
11	1.20686e-05	0	0	0	0	0	0	0	0	0	0	0	0	0	0	0	2255.29	1886.84	2.32804	0
12	0.00358075	46.9	3.429	0	16.667	0	0	8.18645	136.843	0	0	0	0	0	0	0	2320.56	1960.54	2.32804	4.16983
13	1.20687e-05	0	0	0	0	0	0	0	0	12.5	0	0	0	0	0	0	2318.12	1893.51	2.34528	0
14	0.00216097	0	0	0	0	0	0	0	0	0	0	0	0	0	0	0	2334.64	1928.79	2.34528	0
15	2.06123e-05	0	0	0	0	0	0	0	0	0	0	0	0	0	0	0	2399.85	2003.46	2.2595	0
16	2.14794e-05	0	0	0	0	0	0	0	0	0	0	0	0	0	0	0	2368.93	1999.37	2.2595	0
17	3.09909e-06	0	0	0	0	0	0	0	0	0	0	0	0	0	0	0	2465.9	2078.49	2.30982	0
18	7.85869e-05	0	0	0	0	0	0	0	0	0	0	0	0	0	0	0	2465.9	2078.49	2.30982	0
19	8.56472e-05	0	0	0	0	0	0	0	0	0	0	0	0	0	0	0	2635.61	2083.63	2.09318	0
20	3.82838e-06	0	0	0	0	0	7.14286	0	0	0	0	0	0	0	0	0	2502.42	2148.84	2.30982	0
21	8.67598e-05	0	0	0	0	0	3.87097	0	0	0	0	0	0	0	0	0	2483.97	2113.66	2.30982	0
22	0.00626386	0	0	0	0	0	0	0	0	0	0	0	0	0	0	0	2374.51	2066.63	2.30982	0
23	0.000139805	0	0	0	0	0	3.14465	0	0	0	0	0	0	0	0	0	2589.54	2102.6	2.09318	0
24	0.0097764	11.5	3.394	0	25.893	0	8.60215	10.4232	33.7548	2.703	0	0	18.75	0	0	0	2129.99	2099.3	2.289	0
25	0.00412368	27.4	3.324	0.885	19.469	0	5.26316	10.3726	82.4506	4.348	0	0	0	0	0	0	2095.69	2140.61	2.27309	0.75815
26	0.000869683	128.8	3.027	4.464	26.786	0	0	10.4232	425.442	0	0	0	0	0	0	0	2140.91	2211.27	2.19145	1.13723
27	0.000300031	133.3	3.333	2.5	25	0	0	16.0676	399.958	0	0	0	0	0	0	0	2168.11	2208.14	2.18262	0
28	0.000300033	66.7	4	0	20	0	3.22581	18.9124	166.648	0	0	0	0	0	0	0	2195.54	2205.57	2.18553	0
29	0.000855756	114.5	3.161	3.061	25.51	0	10.7143	11.1874	350.567	0	0	0	0	0	0	0	2187.49	2281.95	2.11994	0.75815
30	0.000300032	120	3	0	33.333	0	3.0303	16.566	399.958	0	0	0	0	0	0	0	2214.12	2278.91	2.11118	0.379075
31	0.000300032	113.3	3.091	2.941	17.647	0	0	16.8269	366.628	0	0	0	0	0	0	0	2218.1	2240.99	2.13141	0.379075
32	0.000313498	149.9	3.357	0	23.404	0	0	15.264	446.573	0	0	0	0	0	0	0	2218.1	2240.99	2.1432	0
33	0.000312141	137.8	3.308	0	23.256	0	0	15.713	416.478	0	0	0	0	0	0	0	2223.21	2203.57	2.16204	1.5163
34	0.000314862	0	0	0	0	0	0	0	0	0	0	0	0	0	0	0	2251.09	2202.14	2.16297	0
35	0.00313228	57.1	3.315	0.559	24.581	0	0	44.6256	169.206	0	0	0	100	0	0	0	2236.77	2130.29	2.2183	1.13723
36	0.00409232	0	0	0	0	0	0	0	0	0	0	100	0	100	0	0	2209.56	2356.13	2.02962	0
37	0.00402854	39.7	3.556	0	19.375	0	1.90476	8.44535	111.703	2.941	0	0	0	0	0	0	2111.57	1775.35	2.5663	4.16983
38	0.00416724	26.9	3.862	0	25	0	3.92157	10.4232	69.5904	0	0	0	0	0	0	0	2032.19	1739.85	2.63259	0
39	0.0012973	25.4	3	6.061	12.121	0	0	16.9605	84.7915	0	0	0	50	0	0	0	2000.63	1740.94	2.64625	0
40	0.000674106	53.4	3.6	5.556	25	0	3.22581	16.566	148.345	0	0	0	0	0	0	0	1969.2	1742.75	2.65859	0
41	0.00087127	0	0	0	0	0	0	0	0	0	0	0	0	0	0	0	1921.26	1709.9	2.69017	0
42	0.00198751	0	0	0	0	0	0	0	0	0	0	0	0	0	0	0	1889.51	1639.16	2.75638	0
43	0.00311055	4.5	3.5	0	28.571	0	20	19.9734	12.8594	0	0	0	0	0	0	0	1842.23	1607.32	2.79797	0
44	0.00559351	0	0	0	0	0	0	0	0	0	9.52	0	0	0	0	0	1825.74	1646.83	2.77394	0
45	0.0104463	3.4	3.5	0	22.857	0	21.4286	94.8456	9.57276	0	3.13	0	3.13	0	0	0	1717.25	1705.84	2.75676	0.379075
46	0.00192365	7.3	3.5	14.286	0	0	16.6667	19.9734	15.5954	25	0	0	0	0	0	0	1638	1687.64	2.78503	1.5163
47	0.00347676	3.5	3	0	16.667	0	0	20.354	11.505	0	0	0	0	0	0	0	1625.65	1731.14	2.75691	0
48	0.00426603	7.3	3.1	6.452	12.903	0	1.07527	17.2342	23.441	3.448	4.17	0	0	0	0	0	1614.76	1774.99	2.73876	0.75815
49	0.00550103	0	0	0	0	0	0	0	0	0	0	0	0	0	0	0	1791.95	1844.97	2.63175	0
50	0.00559786	0	0	0	0	0	7.69231	0	0	3.571	0	0	0	0	0	0.29	1851.45	1832.63	2.6666	0
51	1.20686e-05	0	0	0	0	0	0	0	0	0	0	0	0	0	0	0	1844.97	1757.15	2.58227	0
52	0.0064807	2.6	3.4	0	5.882	0	0	201.315	7.71522	0	0	0	7.14	0	0	0	1930.42	1858.24	2.58227	0
53	0.00277014	0	0	0	0	0	0	0	0	0	0	0	0	0	0	0	2059.3	2031.26	2.40121	0
54	0.00390682	33.5	3.195	0	21.374	0	3.07018	9.53892	104.945	5.195	0	0	0	0	0	0.13	1981.01	2003.46	2.45277	2.65353
55	0.0078084	0	0	0	0	0	0	0	0	0	0	0	0	0	0	0.43	1832.63	2204.42	2.49662	0
56	0.0280137	0	0	0	0	0	0	0	0	0	0	0	0	0	0	0	1707.69	2077.58	2.6323	0
57	0.000843685	23.7	3.333	0	30	0	0	18.9124	71.1166	0	0	0	0	0	0	0	1874.45	1984.5	2.48537	0
58	0.00282748	6.4	3	0	27.778	0	0	19.2533	21.2203	0	0	0	0	0	0	0	1865.69	1494.79	2.87251	0
59	0.00343186	0	0	0	0	0	7.14286	0	0	0	0	0	0	0	0	0	1906.77	1601.04	2.77812	0
60	0.00399742	7.3	4.143	0	17.241	0	13.3333	17.5168	17.5113	0	0	0	0	0	0	0	1886.51	1457.22	2.89231	4.16983
61	0.00169834	0	0	0	0	0	0	0	0	0	0	0	0	0	0	0	1925.19	1563.61	2.79832	0
62	0.00199078	0	0	0	0	0	6.89655	0	0	0	0	0	0	0	0	0	1986.09	1633.38	2.73447	0
63	0.00343453	0	0	0	0	0	0	0	0	0	0	0	0	0	0	0	1990.84	1561.99	2.77238	0
64	0.0032391	0	0	0	0	0	0	0	0	0	0	0	0	0	0	0	2023.8	1562.4	2.75605	0
65	0.00218642	0	0	0	0	0	11.5385	0	0	0	0	0	0	0	0	0	2089.97	1565.62	2.73326	0
66	0.00426555	4.2	3	0	16.667	0	0	469.871	14.0662	0	0	0	0	0	0	0	1919.95	1455.93	2.88046	1.5163
67	0.00989695	1.6	2.667	0	12.5	0	0	19.6067	6.06247	0	0	0	0	0	0	0	1868.39	1278.49	3.02632	0
68	0.00526827	0	0	0	0	0	0	0	0	0	0	0	0	0	0	0	1809.1	1317.8	2.99586	0
69	0.00386894	0	0	0	0	0	5.40541	0	0	0	0	0	0	0	0	0	1782.79	1211.68	3.07083	0
70	0.00369221	0	0	0	0	0	0	0	0	0	0	0	0	0	0	0	1819.17	1353.19	2.97366	0
71	0.00166272	43.9	2.92	0	16.438	0	0	12.8726	150.356	0	0	0	0	0	0	0	1762.52	1105.64	3.11983	0.379075
72	0.00177747	50.6	3.333	2.222	26.667	0	4.54545	11.6765	151.901	0	0	0	0	0	0	0	1727.5	1109.62	3.11396	0.75815
73	0.0021262	44.7	3.654	2.105	28.421	0	9.09091	11.3659	122.284	0	0	0	0	0	0	0	1692.49	1114.72	3.10742	0.379075
74	0.00359632	45.6	3.154	0	28.659	0	1.51515	8.31389	144.592	0	0	0	0	0	0	0	1674.52	974.792	3.09878	1.13723
75	0.0029309	38.2	3.111	0	31.25	0	2.17391	10.4232	122.829	0	0	0	0	0	0	0	1713.21	1004.09	3.12142	3.41168
76	0.0023281	52.8	3.154	0	27.642	0	3.61446	9.89229	167.519	0	0	0	0	0	0	0	1727.5	999.685	3.12653	0.379075
77	0.0246215	0	0	0	0	0	0	0	0	0	0	25	0	0	0	0	1255.11	1955.07	3.14044	0
78	9.8073e-06	0	0	0	0	0	0	0	0	14.286	0	0	0	0	0	0	1159.06	1832.63	3.14044	0
79	0.00915269	0	0	0	0	0	0	0	0	0	0	0	0	0	0	0	1279.97	1714.68	3.03554	0
80	0.00304781	0	0	0	0	0	2.17391	0	0	0	0	0	6.67	0	0	0	1471	1392.21	2.97894	0
81	0.00215434	40.4	3.222	0	28.736	0	2.53165	11.8712	125.328	0	0	0	0	0	0	0	1657.5	1120.92	3.10043	0
82	0.0013547	40.6	3.235	1.818	30.909	0	20	14.4387	125.489	0	0	0	0	0	0	0	1642.61	1016.56	3.10823	0.379075
83	5.07404e-05	0	0	0	0	0	6.94444	0	0	3.571	0	0	0	0	0	0	1059.06	714.421	3.15979	0
84	0.000128417	0	0	0	0	0	2.7027	0	0	0	0	0	0	0	0	0	1145.94	810.299	3.28693	0
85	0.00203576	0	0	0	0	0	0	0	0	0	0	0	0	0	0	0	1595.52	1429.28	2.95829	0
86	8.87578e-05	0	0	0	0	0	0	0	0	0	0	0	0	0	0	0	1679.03	1225.64	3.03822	0
87	0.00405513	6.2	3.571	0	8	0	0	102.886	17.2621	0	0	0	0	0	0	0	1832.63	1497.74	2.88649	0.379075
88	0.0036153	3.6	2.6	0	23.077	0	0	114.538	13.8301	0	0	0	0	0	0	0.27	1728.96	1400.78	2.99677	0
89	0.00456166	7	3.2	6.25	21.875	0	8	17.0962	21.9218	0	0	0	0	0	0	0	1740.94	1325.43	3.00619	0.75815
90	0.00384145	0	0	0	0	0	0	0	0	0	0	0	0	0	0	0	1662.82	1301.93	3.03822	0
91	0.00411039	0	0	0	0	0	2.14286	0	0	2	3.85	0	0	0	0	0	1628.74	1309.17	3.02204	0
92	0.00178204	0	0	0	0	0	0	0	0	0	0	0	0	0	0	0	1571.65	1360.62	2.9956	0
93	0.00162339	9.9	3.2	0	0	0	0	19.6067	30.7997	0	0	0	0	0	0	0	1605.36	1351.79	2.99999	0
94	0.00226366	0	0	0	0	0	0	0	0	0	0	0	0	0	0	0	1628.74	1420.88	2.96033	0
95	0.00440391	0	0	0	0	0	0	0	0	0	0	0	0	0	0	0	1662.06	1413.32	2.95603	0
96	0.00413562	0	0	0	0	0	0	0	0	0	0	0	0	0	0	0	1766.81	1506.13	2.88073	0
97	0.0028851	5.9	3.4	0	29.412	0	0	19.4284	17.3304	0	0	0	0	0	0	0	1748.16	1546.59	2.86966	1.5163
98	0.00263926	0	0	0	0	0	0	0	0	0	0	0	0	0	0	0	1683.53	1559.57	2.87571	0
99	0.00204898	0	0	0	0	0	0	0	0	0	0	0	0	0	0	0	1635.31	1610.07	2.85142	0
100	0.0019084	0	0	0	0	0	0	0	0	0	0	0	0	0	0	0	1620.6	1653.32	2.82484	0
101	9.77638e-05	0	0	0	0	0	0	0	0	0	0	0	0	0	0	0	1589.58	1662.82	2.75691	0
102	0.00158587	0	0	0	0	0	0	0	0	0	0	0	0	0	0	0	1587.6	1584.82	2.86423	0
103	0.0038172	0	0	0	0	0	0	0	0	0	0	0	0	0	0	0	1575.65	1472.71	2.93363	0
104	0.00190723	0	0	0	0	0	7.14286	0	0	0	0	0	0	0	0	0	1516.55	1414.66	2.96926	0
105	0.00431166	0	0	0	0	0	0	0	0	0	0	0	0	0	0	0	1437.63	1720.55	2.89761	0
106	0.00642369	0	0	0	0	0	0	0	0	0	0	0	0	0	0	0	1370.31	1795.11	2.97106	0
107	0.00398602	0	0	0	0	0	7.40741	0	0	0	0	0	0	0	0	0	1482.94	1957.97	2.87443	0
108	0.0141713	0	0	0	0	0	0	0	0	0	0	0	0	0	0	0.61	1531.44	2069.98	2.83735	0
109	0.000281875	0	0	0	0	0	0	0	0	0	0	0	0	0	0	0	1432.8	2080.3	2.90536	0
110	0.00761049	16.2	2.929	1.626	10.569	0	0	9.89229	52.5591	0	0	0	6.9	0	0	0	327.292	1980.37	2.89277	0
111	0.00724233	4.8	3.5	2.857	14.286	0	0	94.8456	13.8077	0	0	0	13.33	0	0	0	319.499	1911.73	2.93873	0.379075
112	0.00838446	3.1	2.889	0	34.615	0	0	102.021	10.7341	0	23.81	0	11.9	0	0	0	191.173	1886.51	2.96294	0
113	0.0106832	11.7	3.205	0	19.2	0	6.31579	9.80151	36.5058	14.706	31.91	0	23.4	0	0	0	141.999	1965.36	2.9107	0
114	0.00470886	24.2	3.353	3.509	26.316	0	0	10.3225	72.2044	0	0	0	35	0	0	0	112.26	1906.77	2.92987	1.89538
115	0.00537602	6.7	3.6	0	11.111	0	0	16.566	18.6011	0	0	0	10.53	0	0	0	181.014	1842.23	2.9659	0.75815
116	0.00958664	9.5	3.138	2.198	15.385	0	0	11.6131	30.2504	0	21.95	0	19.51	0	0	0	227.31	1819.86	2.9981	0.379075
117	0.00460736	5.6	4.333	3.846	34.615	0	0	17.9585	13.0226	0	6.25	0	0	0	0	0	327.292	1843.26	3.01913	0
118	0.00787347	10.9	3.44	1.163	12.791	0	1.5873	123.695	31.7522	0	21.62	0	24.32	0	0	0	277.263	1774.28	3.0083	0
119	0.00395512	12.4	3.267	4.082	14.286	0	0	15.0489	37.9255	0	0	0	5	0	0	0	258.443	1762.88	2.98555	0.379075
120	0.00399709	13.8	2.895	3.636	7.273	0	0	14.4387	47.5346	0	0	0	5.26	0	0	0	292.739	1730.78	2.99011	0.379075
121	0.00022529	102.1	3.286	4.348	21.739	0	0.862069	18.4232	310.711	0	0	0	0	0	0	0	354.998	1699.92	3.01714	0
122	0.002611	0	0	0	0	0	0	0	0	0	0	0	14.29	0	0	0	473.627	1663.95	3.11845	0
123	0.0027594	14.9	3.727	0	17.073	0	1.02041	15.9476	39.8637	5.128	0	0	15.38	0	0	0	449.042	1713.21	3.14607	0
124	0.00431444	4.2	3	5.556	22.222	0	8.13008	19.2533	13.9068	0	0	0	16.67	0	0	0	370.629	1753.56	3.09363	0.75815
125	0.00610422	4.6	3.111	0	14.286	0	7.40741	17.6616	14.7439	0	0	0	26.09	0	0	0	336.781	1783.85	3.07829	1.5163
126	0.0107328	12.6	3.214	3.704	14.815	0	0	9.37154	39.1325	0	0	0	21.43	0	0	0	303.311	1814.32	3.05927	1.5163
127	0.00667933	11.4	3.04	1.316	22.368	0	0	12.6441	37.4289	0	0	0	15.15	0	0	0	238.14	1875.79	3.02061	1.5163
128	0.00454153	4.6	3.5	0	28.571	0	10.8108	18.7465	13.2114	0	0	0	0	0	0	0	206.998	1906.77	2.98223	0.75815
129	0.00504646	7.9	3.077	0	17.5	0	0	16.0676	23.779	0	0	0	10.53	0	0	0	70.9997	1953.78	2.90195	1.5163
130	0.0542752	1.5	3.417	0	37.805	0	0	69.3668	4.42191	0	0	0	0	0	0	0.23	227.31	1813.27	2.88308	0.75815
131	3.99992e-06	0	0	0	0	0	1.75439	0	0	4.167	0	0	0	0	0	0	270.359	1734.05	2.88308	0
132	0.00588395	0	0	0	0	0	0	0	0	0	0	0	0	0	0	0.27	370.629	1636.46	3.01454	0
133	0.0217716	0	0	0	0	0	0	0	0	0	0	0	0	0	0	0	543.043	1476.55	3.2419	0
134	0.000131872	0	0	0	0	0	0	0	0	0	0	0	0	0	0	0	610.762	1467.57	3.09312	0
135	0.000989001	0	0	0	0	0	0	0	0	0	50	50	0	50	0	0	573.518	1528.14	3.04089	0
136	0.000100806	0	0	0	0	0	0	0	0	0	0	0	0	0	0	0	561.302	1644.53	2.90108	0
137	0.00198527	0	0	0	0	0	0	0	0	0	33.33	0	0	0	0	0	413.996	1683.16	2.9243	0
138	0.0017346	22.5	3	2.564	7.692	0	0	16.1893	74.9451	0	0	0	11.11	0	0	0	444.812	1893.51	2.76525	0.75815
139	0.00302159	7.3	3.667	4.545	9.091	0	6.66667	18.5834	19.8571	0	5.26	0	5.26	0	0	0	336.781	1952.81	2.85261	1.5163
140	0.00630818	3.3	3	0	14.286	0	3.7037	106.498	11.0967	0	4	0	12	0	0	0	461.498	1942.14	2.78186	0
141	0.00304765	0	0	0	0	0	16.6667	0	0	0	8.33	0	8.33	0	0	0	439.109	1991.16	2.81872	0
142	0.00297003	0	0	0	0	0	5.88235	0	0	0	0	0	0	0	0	0	427.475	1852.13	2.91121	0
143	0.00361683	4.1	2.143	13.333	20	0	3.61446	19.7884	19.3539	0	0	0	6.25	0	0	0	354.998	1674.52	3.00934	0
144	0.00332217	7.2	4	8.333	20.833	0	0	18.2656	18.0605	0	0	0	0	0	0	0	349.633	1668.87	2.99965	1.89538
145	0.0059086	4.4	3.25	7.692	23.077	0	0	17.9585	13.5396	0	0	0	10.71	0	0	0	543.043	1605.36	3.11988	0
146	0.00440943	4.1	2.25	0	16.667	0	11.1111	19.2533	18.1429	0	0	0	0	0	0	0	652.657	1636.46	3.18445	1.5163
147	0.0563004	0	0	0	0	0	0	0	0	0	0	11.11	0	0	0	0.21	878.935	1913.7	3.59087	0
148	0.00323791	6.2	2.857	0	20	0	0	18.9124	21.6189	0	0	0	10	0	0	0	572.418	1740.94	3.21977	0.379075
149	0.00377516	0	0	0	0	0	4.54545	0	0	16.667	0	0	11.76	0	0	0	603.497	1713.58	3.22127	0
150	0.00303035	0	0	0	0	0	0	0	0	0	0	0	0	0	0	0	527.743	1675.65	3.17149	0
151	0.00373253	8	3.333	0	20	0	0	17.3743	24.1123	0	0	0	8.33	0	0	0	508.28	1725.31	3.19162	0
152	0.00456205	0	0	0	0	0	12.1212	0	0	15.385	0	0	0	0	0	0	255.993	1990.84	3.01286	0
153	0.00192895	0	0	0	0	0	2.85714	0	0	0	0	0	0	0	0	0	127.997	1971.76	2.90707	0
154	0.00684993	46	3.088	0.952	20.635	0	1.21951	29.7489	147.447	0	11.11	0	33.33	0	0	0	764.69	106.5	3.01814	1.5163
155	0.00684094	13.9	3.276	1.053	17.895	0	0	64.5691	42.3918	0	0	0	2.5	0	0	0	857.893	79.3801	2.93325	2.65353
156	0.00686705	12.1	2.964	1.205	14.458	0	6.55738	68.9726	40.7744	0	0	0	0	0	0	0	905.072	106.5	2.89628	0
157	0.00571097	16.8	3.2	2.083	19.792	0	0	11.3058	52.5305	0	3.13	0	0	0	0	0.12	952.561	146.37	2.85297	0
158	0.00953849	0	0	0	0	0	6.17284	0	0	0	0	0	0	0	0	0	965.7	238.14	2.93192	0
159	0.00387302	17.3	4.188	0	13.433	0	5.88235	75.8716	41.3114	0	0	0	0	0	0	0	1000.31	191.173	2.80863	0.379075
160	0.00452257	18.1	3.417	4.878	26.829	0	2.5	69.3668	53.0671	0	0	0	3.85	0	0	0	916.144	146.37	2.8204	0.75815
161	0.00459703	16.7	3.5	0	20.779	0	3.64683	12.5697	47.857	0.435	7.14	0	7.14	0	0	0	837.826	112.26	2.87083	0
162	0.002708	17	2.875	2.174	17.391	0	6.56566	15.3738	59.0842	1.563	0	0	14.29	0	0	0	797.76	50.2044	2.93101	0
163	0.00533907	12.9	3.286	2.899	11.594	0	13.7255	13.1906	39.3327	0	0	0	6.67	0	0	0	731.848	158.76	2.93081	0.379075
164	0.00286862	0	0	0	0	0	9.61538	0	0	0	0	0	0	0	0	0	754.737	277.263	2.82524	0
165	0.000359877	100	4	0	22.222	0	9.09091	16.566	250.085	0	0	0	0	0	0	0	652.657	258.443	2.92979	0
166	0.00341156	15.2	3.714	1.923	26.923	0	4.54545	83.7226	41.037	0	0	0	0	0	0	0	604.541	248.499	3.00511	0.75815
167	0.00327746	29.9	3.267	2.041	17.347	0	4.12371	11.1874	91.5342	0	0	0	5.88	0	0	0	582.241	251.022	3.04004	0.379075
168	0.00702927	32.3	3.492	2.203	20.705	0	11.1111	69.1849	91.0478	0	0	0	5.13	0	0	0	718.817	106.5	2.97654	0.379075
169	0.0034168	32.5	3.828	0.901	20.721	0	3.52941	59.5038	84.8748	0	0	0	11.76	0	0	0	590.835	224.521	3.07473	1.13723
170	0.00521523	22.1	3.286	3.478	16.522	0	0	10.2728	65.1936	0	0	0	3.57	0	0	0	700.166	112.26	3.02129	0.379075
171	3.63622e-05	0	0	0	0	0	0	0	0	0	0	0	0	0	0	0	793.801	35.4998	3.02129	0
172	0.00248612	36.6	3.138	2.198	17.582	0	6.66667	11.6131	116.648	0	0	0	0	0	0	0	682.853	127.997	3.04825	0
173	0.0185748	8.1	3.261	1.333	14.667	0	8.57143	91.1115	24.7647	0	0	0	12.5	0	0	0	572.418	439.109	2.86398	1.13723
174	0.0015952	18.8	3.75	0	26.667	0	0	17.3743	50.1504	0	12.5	0	0	0	0	0	619.978	494.456	2.79475	0
175	0.00270003	13	3.5	0	25.714	0	4.7619	16.6954	37.0366	2.128	0	0	0	0	0	0	689.282	365.493	2.80992	0
176	0.00354081	26	3.538	1.087	16.304	0	0	11.5503	73.4295	0	0	0	0	0	0	0	759.73	327.292	2.77464	0
177	0.00429368	29.3	3.405	4.762	16.667	0	7.14286	55.4275	83.8442	11.111	0	0	0	0	0	0	817.268	377.369	2.71262	1.13723
178	0.00504939	24.6	3.351	3.226	24.194	0	0	9.84669	73.2762	0	0	0	3.7	0	0	0	846.803	404.761	2.67546	4.92798
179	0.00211699	8.5	2.571	0	16.667	0	8.77193	19.2533	33.0658	0	0	0	0	0	0	0	925.723	444.812	2.59902	0
180	0.00326235	25.7	3.652	1.19	19.048	0	0	12.0724	70.5012	0	0	0	0	0	0	0	858.627	454.62	2.63551	0.379075
181	0.00268925	32.4	3.107	2.299	18.391	0	2.8777	11.8712	104.118	0	0	0	0	0	0	0	778.572	504.548	2.66318	2.27445
182	0.00277355	23.8	4.4	1.515	19.697	0	0	13.4395	54.0824	0	0	0	0	0	0	0	762.214	454.62	2.7088	0
183	0.00287472	13.9	3.333	0	22.5	0	0	16.0676	41.7432	0	0	0	0	0	0	0	700.166	413.996	2.7719	0
184	6.17372e-06	0	0	0	0	0	0	0	0	0	0	0	0	0	0	0	666.982	476.28	2.73152	0
185	3.8669e-06	0	0	0	0	0	0	0	0	0	0	0	0	0	0	0	666.982	476.28	2.73152	0
186	0.00273366	34.4	3.76	4.255	13.83	0	0	11.4267	91.4525	0	0	0	21.43	0	0	0	699.266	493.18	2.73152	0.379075
187	0.00381565	29.9	3.353	1.754	21.053	0	8.49673	10.3225	89.1067	0	0	0	0	0	0	0	629.059	573.518	2.72678	0.379075
188	0.002066	26.1	3	1.852	12.963	0	11.1111	82.5832	87.1249	0	0	0	10	0	0	0	663.192	587.627	2.68884	0.379075
189	0.0030163	30.8	3.875	3.226	15.054	0	0	11.4882	79.5676	0	0	0	0	0	0	0	718.817	541.882	2.68149	0.75815
190	0.00307401	11.7	3.273	0	16.667	0	9.30233	16.566	35.7839	0	7.14	0	14.29	0	0	0	741.259	590.835	2.62793	0
191	0.00187128	24.6	3.286	2.174	15.217	0	7.89474	15.3738	74.8153	0	0	0	10	0	0	0	785.823	582.241	2.59527	1.13723
192	0.00289675	24.9	3.429	0	20.833	0	7.5	12.9507	69.0428	0	0	0	0	0	0	0	811.076	527.743	2.61781	0
193	0.00327201	36.7	3.429	1.667	23.333	0	8.21918	10.0316	106.968	0	0	0	0	0	0	0	873.181	504.548	2.59219	1.13723
194	0.00430524	20	3.071	4.651	18.605	0	5.81395	67.8163	65.037	0	4.17	0	4.17	0	0	0	831.03	577.896	2.56333	0.379075
195	0.00327337	44	3.064	0	18.75	0	3.84615	51.217	143.583	8.571	0	0	0	0	0	0	890.332	554.525	2.55015	0
196	0.002849	20.7	3.278	6.78	20.339	0	1.45985	79.8659	63.18	0	0	0	6.25	0	0	0	968.957	524.149	2.51909	4.92798
197	0.00280293	7.1	3.333	0	10	0	0	18.9124	21.4062	0	0	0	0	0	0	0	937.895	493.18	2.55913	0
198	0.000593815	0	0	0	0	0	4.6875	0	0	0	0	0	0	0	0	0	1286.35	753.065	2.19439	0
199	0.00242455	16.5	3.333	2.5	20	0	4.5977	91.2789	49.4937	0	0	0	0	0	0	0	1016.56	603.497	2.44656	0
200	0.00267133	9.4	2.778	4	8	0	9.67742	18.1108	33.6911	0	7.14	0	7.14	0	0	0	955.863	610.762	2.47577	0.75815
201	0.00311488	16.7	3.467	0	28.846	0	1.53846	14.7375	48.1559	0	0	0	11.76	0	0	0	870.289	704.652	2.45121	0
202	0.00244243	25.8	3.5	6.349	19.048	0	10.2041	13.698	69.6029	0	0	0	7.69	0	0	0	828.752	709.997	2.4829	0.379075
203	0.00297708	25.5	3.8	0	18.421	0	5.26316	12.6441	67.18	8	0	0	0	0	0	0	758.9	669.81	2.55251	0.379075
204	0.00354639	24	3.4	3.529	16.471	0	0	12.0046	70.4943	0	0	0	0	0	0	0	717.94	682.853	2.5698	4.16983
205	0.0018875	58.3	3.056	2.727	20	1.818	3.22581	10.5259	185.431	0	0	0	9.09	0	0	0	678.224	699.266	2.59227	0
206	0.00248976	0	0	0	0	0	8.69565	0	0	0	0	0	0	0	0	0	647.811	652.657	2.71667	0
207	0.00159182	22.6	3.6	5.556	16.667	0	0	16.566	62.8212	0	0	0	12.5	0	0	0	638.997	752.228	2.56976	0.75815
208	0.00900362	0	0	0	0	0	3.77358	0	0	0	0	0	0	0	0	0	955.203	981.877	2.13103	0
209	0.00529655	39.1	3.393	0.966	16.425	0	10.5263	7.12206	115.169	0	0	0	18.52	0	0	0	603.497	741.259	2.5988	0.379075
210	0.00874485	28.1	3.465	0.407	22.358	0	8	35.8047	81.1906	4.348	0	0	4.55	0	0	0	533.68	758.9	2.62811	0
211	0.00530524	40.3	3.452	0.935	11.215	0	0	6.95965	116.866	0	0	0	12	0	0	0	449.042	852.736	2.56273	6.0652
212	0.00383607	47.2	3.62	0	20.442	0	0	7.79798	127.735	0	0	0	5.56	0	0	0	496.998	717.94	2.69476	0.75815
213	0.00311182	0	0	0	0	0	6.45161	0	0	3.279	8.33	0	0	0	0	0	537.21	654.585	2.75356	0
214	0.0113815	4.1	3.133	0	10.638	4.255	1.28205	15.264	13.1793	0	0	0	0	0	0	0	146.37	718.817	2.90934	0
215	0.00100564	26.8	3.857	7.407	14.815	0	8.64198	17.8088	69.6073	3.846	0	0	0	0	0	0	321.465	678.224	2.82254	0
216	0.00188134	10.1	3.167	5.263	5.263	0	2.32558	19.0814	31.8921	0	15.38	0	0	0	0	0	449.042	569.106	2.88221	0
217	0.00290012	15.2	3.667	0	2.273	0	0	15.5983	41.3776	0	0	0	0	6.25	0	0	382.345	569.106	2.94255	0
218	0.000385328	0	0	0	0	0	4.30108	0	0	33.333	0	0	0	0	0	0	461.498	533.68	2.90207	0
219	0.00242423	21	3.923	0	9.804	0	0	14.8398	53.6253	0	0	15.38	0	15.38	0	0	444.812	496.998	2.93446	0
220	0.00370056	21.9	3.375	0	13.58	0	0	69.7655	64.855	0	5	0	0	5	0	0	433.331	462.861	2.95592	1.13723
221	0.00421984	24.9	3.5	3.81	12.381	3.81	0	10.7918	71.0928	0	0	0	4.35	0	0	0	349.633	572.418	2.93376	1.13723
222	0.00431275	20.6	3.56	2.247	19.101	4.494	4.06504	66.6982	57.9677	5.128	0	0	0	0	0	0	286.209	585.478	2.9199	4.5489
223	0.00428461	18.9	3	4.938	13.58	1.235	6.41026	12.2806	63.0163	25	4.17	0	0	4.17	0	0	404.761	466.928	2.9763	0.379075
224	0.00441063	26.1	3.382	2.609	14.783	0.87	5.26316	58.3593	77.0864	3.704	0	0	8.7	0	0	0	401.635	439.109	3.01861	1.13723
225	0.00448486	37.2	3.036	2.994	12.575	0.599	4.90798	46.6856	120.405	1.613	0	0	8.7	0	0	0	277.263	561.302	2.93149	0.75815
226	0.0012365	35.6	2.75	2.273	4.545	59.091	3.9604	15.5983	129.398	1.538	0	0	14.29	0	0	0	177.499	652.657	2.9082	0
227	0.00351354	23.1	3.522	1.235	18.519	0	6.14035	12.2806	65.461	0	0	0	0	5.56	0	0	191.173	673.562	2.90057	1.13723
228	0.0019427	32.9	3.556	0	10.938	0	4.45545	13.6107	92.6545	0	8.33	0	0	0	0	0	224.521	663.192	2.87724	0
229	0.000150275	0	0	0	0	0	0	0	0	0	0	0	0	0	0	0	258.443	654.585	2.85511	0
230	0.00605	33.4	3.483	0.495	17.822	16.832	5.52764	7.24279	95.8678	0	0	0	3.33	0	0	0	427.475	746.342	2.69859	0
231	0.00625723	31.5	3.23	4.569	17.766	17.259	0	7.36769	97.4873	0	0	0	7.14	0	0	0	396.9	888.206	2.57199	6.0652
232	0.00493157	43.6	5.119	2.791	8.372	0	5.58376	39.4089	81.1101	0	0	0	16.67	0	0	0	354.998	929.12	2.61602	0
233	0.0041201	37.4	3.422	1.948	15.584	0	4.28571	8.65054	109.221	0	0	0	15	0	0	0	356.769	746.342	2.72577	2.27445
234	0.00211377	40.2	3.036	4.706	14.118	0	8.57143	12.0046	132.465	0	0	0	10	0	0	0	286.209	753.065	2.75872	1.5163
235	0.00294416	32.3	3.654	2.105	16.842	0	1.12994	64.5691	88.3105	1.724	0	0	21.43	0	0	0	286.209	863.749	2.6749	1.5163
236	0.00306133	25.2	3.208	6.494	14.286	1.299	9.7561	71.4075	75.1308	0	0	0	14.29	0	0	0	224.521	800.913	2.76694	1.13723
237	0.00685076	29.6	9.667	0.985	5.911	0	3.3557	7.21832	27.7341	5.556	0	0	27.27	0	0	0	277.263	905.072	2.67767	0.379075
238	0.0146825	0	0	0	0	0	0	0	0	0	0	0	0	0	0	0	365.493	1093.6	2.75453	0
239	0.00277484	32.1	3.87	2.247	22.472	0	0	11.7407	82.8876	0	0	0	23.08	0	0	0	283.999	717.94	2.78789	0.75815
240	0.0452797	13.1	2.563	2.534	16.216	0	4.72441	3.11891	50.7954	1.923	0	0	50	0	0	0	663.192	224.521	3.07378	1.5163
241	0.00472412	7.4	4.375	5.714	8.571	0	6.54206	16.6954	16.9344	0	0	0	0	0	0	0	604.541	370.629	3.09811	0
242	0.00648551	13.1	3.864	1.176	29.412	0	0	12.0046	33.9218	0	0	0	3.33	0	0	0	753.065	286.209	3.08837	0
243	0.00460881	6.7	2.818	3.226	9.677	0	0	17.2342	23.8673	0	0	0	4.76	0	0	0	746.342	356.769	3.13855	0.379075
244	0.0047255	0	0	0	0	0	5.88235	0	0	0	0	0	0	0	0	0	638.997	396.9	3.1282	0
245	0.00329167	5.8	3.167	0	10.526	0	8.77193	19.0814	18.2279	0	0	0	0	0	0	0	675.431	427.475	3.15648	0.379075
246	0.00134827	0	0	0	0	0	4.68966	0	0	1.064	0	0	0	0	0	0	713.538	461.498	3.18186	0
247	0.00195092	30.8	3.75	0	11.667	0	0	13.9667	82.0126	0	8.33	0	8.33	0	0	0	745.497	392.109	3.15018	1.13723
248	0.0283786	29.2	2.933	1.446	17.711	0	0	2.31465	99.3707	0	0	0	100	0	0	0	852.736	382.345	3.12825	1.5163
249	0.115982	0	0	0	0	0	0	0	0	0	0	0	0	0	0	0	699.266	678.224	3.15979	0
250	0.000368436	0	0	0	0	0	0	0	0	0	0	0	0	0	0	0	846.803	851.996	3.05464	0
251	0.0230292	0	0	0	0	0	5.88235	0	0	0	0	0	0	0	0	0	628.056	853.474	2.91502	0
252	0.000302393	0	0	0	0	0	4.65116	0	0	4.878	0	0	0	0	0	0	537.21	1209.08	2.52527	0
253	0.00272118	0	0	0	0	0	0	0	0	0	0	0	0	0	0	0	462.861	1086.67	2.62487	0
254	0.133397	0	0	0	0	0	1	0	0	3.125	0	0	0	0	0	0	158.76	831.788	3.86263	0
255	0.00537552	16.6	3.423	4.494	17.978	2.247	3.80952	11.7407	48.3674	11.765	4.76	0	0	0	0	0	224.521	590.835	2.97227	0.75815
256	0.00412829	35.1	3.718	2.069	24.138	0.69	0	8.97771	94.47	0	0	0	9.09	0	0	0	255.993	555.661	2.97292	1.5163
257	0.00417762	30.9	3.395	3.876	17.054	0	3.87097	9.62488	90.9609	0	0	0	4.55	0	0	0	251.022	573.518	2.93355	2.27445
258	0.0043958	33.7	3.61	1.351	14.189	0.676	2.38095	50.3668	93.2707	0	0	0	4.35	0	0	0	383.99	428.946	3.10621	2.27445
259	0.00437332	40.9	3.377	4.469	17.318	0	0.833333	7.85533	121.189	7.895	0	0	4.17	0	0	0	365.493	444.812	3.10048	5.68613
260	0.00873529	0	0	0	0	0	3.44828	0	0	6.667	0	0	0	0	0	0	428.946	383.99	3.10547	0
261	0.0033286	26.7	3.56	4.494	22.472	0	0	11.7407	75.1067	0	0	0	5.56	0	0	0	603.497	206.998	3.10109	1.5163
262	0.000297266	0	0	0	0	0	10.1266	0	0	0	0	0	0	0	0	0	573.518	251.022	3.12394	0
263	3.15551e-05	0	0	0	0	0	7.5	0	0	0	0	0	0	0	0	0	587.627	227.31	3.10646	0
264	0.00118624	0	0	0	0	0	0	0	0	0	0	0	0	0	0	0	619.978	200.817	3.10646	0
265	0.0784531	0	0	0	0	0	0	0	0	0	0	0	0	0	0	0	540.718	1349.46	2.60695	0
266	0.00931617	0	0	0	0	0	0	0	0	0	0	0	0	0	0	0	682.853	1431.04	2.49444	0
267	0.000917408	0	0	0	0	0	0	0	0	0	0	0	0	0	0	0	748.87	1668.87	2.63338	0
268	0.218199	2.1	65.714	0	0.217	0	0	3.86344	0.0916595	0	0	0	0	0	0	0	493.18	1995.9	2.54456	0
269	0.000189562	0	0	0	0	0	7.40741	0	0	12.5	0	0	0	0	0	0	112.26	2228.3	2.39463	0
270	0.000576888	0	0	0	0	0	0	0	0	0	0	0	0	0	0	0	811.076	1533.08	2.45195	0
271	0.00556267	23	3.368	0.781	14.844	0	3.33333	54.9258	68.3125	2.174	0	0	11.76	0	0	0	317.52	1541.28	2.19426	0.75815
272	0.00556491	31.4	3.302	1.143	23.429	0	2.68456	7.97259	95.2397	1.852	0	0	5.26	0	0	0	305.381	1572.05	2.21539	0.75815
273	0.00559846	30.7	3.127	2.907	13.372	0	9.30233	8.06286	98.2413	0	0	0	6.67	0	0	0	251.022	1565.62	2.26626	0
274	0.00575326	25.6	3.267	3.401	17.007	0	2.77778	8.90289	76.4784	8.696	0	0	8.33	0	0	0	255.993	1599.07	2.29522	0.379075
275	0.00519897	21	3.406	0.917	15.596	0.917	3.33333	10.578	61.5507	1.887	0	0	0	0	0	0	127.997	1455.93	2.42575	6.44428
276	0.00559628	32.5	2.935	3.297	15.385	0	3.10078	80.5078	110.788	2.273	0	0	0	0	0	0	146.37	1421.77	2.41743	0.379075
277	0.00558402	39.8	3.415	0.901	14.414	0	3.57143	6.78287	116.404	2.222	0	0	21.43	0	0	0	181.014	1423.98	2.3806	0
278	0.00618778	27	3.093	0	20.359	0	4.44444	8.21794	87.2688	0	0	0	10.34	0	0	0	248.499	1395.83	2.33943	1.13723
279	0.0055921	30.6	3.638	2.339	16.374	0	0	8.09341	82.2589	0	0	0	21.74	0	0	0	382.345	1552.69	2.13384	1.89538
280	0.00609205	7.7	3.357	4.255	6.383	0	6.81818	86.7136	22.9808	0	0	0	9.09	0	0	0	283.999	1400.78	2.28773	1.13723
281	5.48428e-05	0	0	0	0	0	0	0	0	0	0	0	0	0	0	0	238.14	1285.86	2.33943	0
282	6.04456e-05	0	0	0	0	0	0	0	0	0	0	0	0	0	0	0	224.521	1321.15	2.33943	0
283	9.14347e-05	0	0	0	0	0	0	0	0	0	0	0	0	0	0	0	317.52	1102.78	2.50069	0
284	0.000169967	0	0	0	0	0	0	0	0	0	0	0	0	0	0	0	270.359	1136.55	2.53369	0
285	0.000909453	0	0	0	0	0	8.33333	0	0	5.556	0	0	25	0	0	0	158.76	1315.41	2.47787	0
286	0.00753283	20.7	3.467	2.564	15.385	0	3.07692	8.58104	59.7385	0	0	0	3.57	0	0	0	79.3801	1459.38	2.54234	0.379075
287	8.01918e-06	0	0	0	0	0	3.65854	0	0	4	0	0	0	0	0	0	127.997	1490.99	2.54234	0
288	0.00592122	19.4	3.382	1.739	13.043	0	0	58.3593	57.4206	0	0	0	5.88	0	0	0.13	215.937	1597.89	2.37267	2.27445
289	0.00533768	30.4	3.447	0	19.753	0	1.98675	47.6011	88.0532	0	4.17	0	4.17	0	0	0	212.999	1599.07	2.39361	0.379075
290	0.00441704	26.7	3.189	1.695	17.797	0	1.96078	10.1267	83.7665	2.941	0	0	0	0	0	0	112.26	1494.79	2.50384	0.75815
291	0.00438733	25.8	2.974	5.31	11.504	0.885	12.6582	10.3726	84.3338	0	0	0	0	0	0	0	150.613	1501.52	2.53375	0.379075
292	0.00440438	36.6	3.354	2.484	10.559	0	0.0990099	8.4121	108.982	3.448	0	0	14.29	0	0	0	251.022	1636.46	2.4182	1.13723
293	0.00353096	24.9	3.259	7.955	13.636	0	1.45985	11.8056	76.4665	0	0	0	8.33	0	0	0	270.359	1642.61	2.43794	0
294	0.0043969	18.2	3.636	0	5	0	3.15789	70.1689	50.0353	0	0	0	4.55	0	0	0	200.817	1541.28	2.51448	0.379075
295	0.00439317	24.1	3.029	0	17.925	0	5.06329	10.7375	79.6692	0	0	0	0	0	0	0	227.31	1546.59	2.53112	1.5163
296	0.0028244	41.1	3.515	0	8.621	0	4.6729	10.2237	116.839	0	0	0	10	0	0	0	286.209	1646.83	2.44569	0
297	0.00343679	7.6	3.25	0	7.692	0	4.80769	17.9585	23.2775	2.703	0	0	40	0	0	0	327.292	1657.5	2.45199	0
298	0.00322352	10.2	3.3	0	18.182	0	9.15493	16.9605	31.022	0	0	0	20	0	0	0	305.381	1594.33	2.48574	1.13723
299	0.00220023	32.7	3.273	0	15.278	0	0	134.193	99.9896	0	0	0	0	0	0	0	349.633	1575.65	2.53911	0.379075
300	0.00249614	0	0	0	0	0	4.02299	0	0	1.449	0	0	0	0	0	0	362.029	1516.55	2.58685	0
301	0.00628435	30.7	2.757	4.145	13.99	1.036	0	42.4408	109.796	0	0	0	0	0	0	0	396.9	1619.04	2.54055	0.379075
302	0.113404	9	30.909	0	1.569	0.196	0	1.9195	2.55724	0	0	0	0	0	0	0	817.268	1968.88	2.50137	4.5489
303	0.000196846	0	0	0	0	0	0	0	0	0	0	0	0	0	0	0	537.21	2077.58	2.45368	0
304	7.965e-05	0	0	0	0	0	0	0	0	0	0	0	0	0	0	0	753.065	2127.62	2.50137	0
305	4.08196e-05	0	0	0	0	0	0	0	0	0	0	0	0	0	0	0	724.058	2175.07	2.50137	0
306	0.000159209	0	0	0	0	0	0	0	0	0	0	0	0	0	0	0	828.752	2130.29	2.51509	0
307	4.77282e-05	0	0	0	0	0	0	0	0	0	0	0	0	0	0	0	809.521	2209.56	2.50137	0
308	0.0136579	0	0	0	0	0	0	0	0	0	0	0	0	0	0	0	943.254	2268.66	2.35296	0
309	0.000313497	0	0	0	0	0	10.3448	0	0	0	0	0	0	0	0	0	955.203	2211.56	2.35707	0
310	0.0007864	0	0	0	0	0	0	0	0	0	0	0	0	0	0	0	974.792	2282.23	2.23033	0
311	0.000923947	0	0	0	0	0	0	0	0	0	0	0	0	0	0	0	986.998	2268.1	2.28218	0
312	0.00292763	0	0	0	0	0	0	0	0	0	0	0	0	0	0	0	1053.69	2360.14	2.1711	0
313	0.00352738	0	0	0	0	0	6.25	0	0	0	0	0	0	0	0	0	1114.15	2428.56	2.08738	0
314	0.0044871	0	0	0	0	0	0	0	0	0	0	0	0	0	0	0	1063.81	2380.34	2.18938	0
315	5.9336e-05	0	0	0	0	0	4.65116	0	0	0	0	0	0	0	0	0	984.441	2368.93	2.25205	0
316	0.000928037	37.7	2.917	0	8.571	0	0	16.6954	129.305	0	0	0	0	0	0	0	953.883	3017.49	1.84547	0
317	0.00181504	17.6	3.556	9.375	12.5	0	17.0213	17.0962	49.5858	5.882	0	0	10	0	0	0	903.679	2988.11	1.83184	0.379075
318	0.00192472	47.3	3.138	3.297	16.484	0	0	11.6131	140.28	0	0	0	0	0	81.82	0	878.935	2953.11	1.82799	0
319	0.00218496	23.3	3.643	1.961	7.843	1.961	6.12245	14.8398	64.0745	0	0	0	0	0	0	0	959.153	2937.06	1.84757	1.89538
320	0.00237676	14.7	3.182	5.714	11.429	0	0	16.6954	46.2815	0	0	0	0	0	0	0	955.203	2977.12	1.85179	1.5163
321	0.00227527	18.9	3.071	4.651	16.279	0	6.06061	15.713	61.5313	0	0	0	0	0	0	0	1036.81	2963.76	1.90684	2.65353
322	0.00210407	24.2	3.923	1.961	15.686	1.961	11.7647	14.8398	61.7851	0	0	0	0	0	0	0	1015.32	2928.47	1.88999	0
323	7.68468e-05	0	0	0	0	0	8.69565	0	0	0	0	0	0	0	0	0	1065.59	2847.96	2.02683	0
324	0.00111832	22.4	3.571	0	16	0	21.4286	18.1108	62.5937	0	0	0	0	0	0	0	1063.81	2808.08	2.02683	0
325	0.00217364	38.6	3.231	4.762	20.238	0	4.16667	12.0724	115.015	0	0	0	0	0	0	0	1048.9	2772.63	2.04782	0.75815
326	8.67328e-05	0	0	0	0	0	10.7143	0	0	0	0	0	0	0	0	0	1063.81	2774.67	2.03863	0
327	0.0048489	4.9	3.429	0	25	0	0	18.2656	14.4363	0	0	0	12.5	0	0	0	937.895	2787.36	1.89207	1.13723
328	0.000388428	51.5	3.333	0	30	0	0	18.9124	154.469	0	0	0	50	0	0	0	907.158	2791.65	1.89207	0
329	0.00024188	37.2	2.25	0	11.111	0	12.5	20.9528	165.371	0	0	0	100	0	0	0	876.782	2796.39	1.82645	0
330	0.00229405	25.3	3.867	0	22.414	0	14.1593	14.1517	65.3867	2.564	0	0	0	0	0	0	895.976	2831.54	1.82645	0
331	0.00552587	17.6	3.464	9.278	13.402	1.031	15.3846	11.2463	48.8611	0	0	0	0	0	0	0	945.256	2862.09	1.83736	2.65353
332	0.00215406	9.7	3	0	28.571	0	25	18.7465	32.4968	0	0	0	8.33	0	33.33	0	831.788	2883.15	1.81277	0
333	0.00038167	41.9	3.2	0	25	0	0	19.6067	131.003	0	0	0	0	0	0	0	797.76	2772.17	1.83939	0
334	0.000218809	0	0	0	0	0	0	0	0	0	0	0	0	0	0	0	793.801	2696.35	1.89098	0
335	5.0146e-06	0	0	0	0	0	0.628931	0	0	0	0	0	0	0	0	0	797.76	2772.17	1.83939	0
336	1.82856e-05	0	0	0	0	0	0	0	0	0	0	0	0	0	0	0	810.299	2731.41	1.89098	0
337	0.00143022	18.9	3	7.407	18.519	0	6	17.8088	62.9275	0	0	0	0	0	0	0	873.181	2721.24	1.91345	1.89538
338	0.0020966	21.9	3.286	0	13.043	0	27.2727	15.3738	66.7747	0	0	0	0	0	0	0	937.223	2712.89	1.95437	0
339	0.0022408	25	3.294	5.357	14.286	1.786	0	14.3417	75.8658	0	0	0	0	0	0	0	1023.97	2737.17	2.07824	0.75815
340	0.00215835	13.9	4.286	3.333	6.667	0	0	17.3743	32.4322	0	0	0	0	0	0	0	955.863	2698.92	2.15557	0
341	0.00177097	11.3	2.857	5	5	0	4.54545	107.44	39.5264	0	0	0	0	0	80	0	873.181	2733.72	2.1596	0
342	0.000111837	0	0	0	0	0	2.5974	0	0	0	0	0	0	0	0	0	843.822	2662.73	2.20744	0
343	0.000489272	0	0	0	0	0	11.1111	0	0	4.167	0	0	0	0	0	0	841.579	2734.41	2.17395	0
344	0.000877724	26.2	3.286	0	26.087	0	0	18.4232	79.7517	0	0	0	0	0	0	0	858.627	2769.9	2.15793	0
345	0.000795541	0	0	0	0	0	0	0	0	0	0	0	0	0	0	0	652.657	2572.7	2.3014	0
346	0.00395229	0	0	0	0	0	0	0	0	0	0	0	0	0	0	0	878.935	2670.99	2.06243	0
347	8.72743e-05	0	0	0	0	0	0	0	0	0	0	0	0	0	0	0	895.976	2485.24	2.18889	0
348	8.72743e-05	0	0	0	0	0	0	0	0	0	0	0	0	0	0	0	895.976	2485.24	2.18889	0
349	0.0101071	0	0	0	0	0	0	0	0	0	0	0	0	0	0	0	955.203	2630.34	2.09798	0
350	0.00263129	25.1	3.143	3.03	19.697	0	17.0213	13.4395	76.0083	0	0	0	0	0	75	0	1105.64	2694.25	2.09943	3.0326
351	0.000154056	0	0	0	0	0	0	0	0	0	100	0	0	0	0	0	1129.88	2727.95	2.08833	0
352	6.25e-06	0	0	0	0	0	0	0	0	0	0	0	0	0	0	0	1180.07	2750.95	2.08833	0
353	2.4e-05	0	0	0	0	0	0	0	0	0	0	0	0	0	0	0	1180.07	2750.95	2.08833	0
354	0.0022553	23.9	3.6	1.852	9.259	0	0	14.5369	66.5099	0	0	0	8.33	0	0	0	1205.95	2829.32	2.10008	1.89538
355	0.00228094	36.8	3	1.19	15.476	0	5.35714	12.0724	122.756	0	0	0	0	0	0	0	1055.49	2672.17	2.09885	0.379075
356	0.00157311	36.9	3.412	0	18.966	0	0	14.1517	108.066	0	0	0	0	0	50	0	1079.69	2750.95	2.09954	0
357	0.00161813	32.8	3.118	0	15.094	0	0	14.6365	105.06	0	0	0	0	0	100	0	1055.49	2763.07	2.08862	0
358	0.00192079	29.2	3.111	0	12.5	0	7.69231	14.3417	93.7114	0	0	0	0	0	0	0	1029.5	2684.17	2.09638	0
359	0.00215148	39	3.5	3.571	19.048	0	11.25	12.0724	111.551	0	8.33	0	0	0	0	0	979.307	2709.41	2.09072	0.75815
360	0.00161231	26.7	3.071	0	18.605	0	8.33333	15.713	86.8319	0	0	0	10	0	100	0	1031.94	2775.58	2.07945	0
361	0.00173035	26.6	3.286	2.174	15.217	0	0	15.3738	80.9086	0	0	0	0	0	0	0	955.203	2722.63	2.08189	0.75815
362	0.00140459	45.6	2.909	3.125	14.063	0	0	13.6107	149.51	0	0	0	0	0	40	0	1009.1	2788.49	2.06835	0.75815
363	0.00163295	24.5	3.333	0	7.5	0	6.75676	91.2789	73.4865	0	0	0	0	0	0	0	931.829	2736.25	2.07137	0
364	0.00131628	19	3.571	0	8	8	9.80392	102.886	53.1804	0	0	0	0	0	0	0	986.998	2801.79	2.05569	0
365	0.00140527	16.4	3.286	0	13.043	0	0	18.4232	49.8123	0	0	0	0	0	0	0	909.24	2750.26	2.08043	0
366	0.00103421	59	3.211	0	21.311	3.279	0	13.876	183.715	0	0	0	0	0	0	0	916.144	2797.06	2.08409	0.379075
367	0.00132484	21.1	3.111	7.143	28.571	0	0	17.6616	67.933	0	0	0	0	0	50	0	945.256	2829.54	2.08096	0
368	0.00107781	19.5	3.5	0	23.81	0	0	18.7465	55.6683	0	0	0	12.5	0	0	0	925.723	2840.21	2.10194	0
369	0.000614066	40.7	3.125	4	20	0	1.78571	102.886	130.279	0	0	0	0	0	0	0	876.782	2805.39	2.14035	0.75815
370	0.00159056	34.6	3.056	3.636	14.545	0	2.7027	14.4387	113.168	0	0	0	0	0	77.78	0	907.158	2804.71	2.12218	0
371	0.00153401	24.1	3.364	0	16.216	0	0	16.4385	71.7073	0	0	0	0	0	100	0	889.624	2769.22	2.14151	0
372	0.00212494	25.4	3	11.111	14.815	0	8.33333	14.5369	80.0021	0	0	0	0	0	0	0	984.441	2769.9	2.09443	1.5163
373	0.00155136	40	3.875	3.226	14.516	0	0	13.7864	103.136	9.091	0	0	12.5	0	0	0	1000.31	2805.39	2.07241	1.5163
374	0.000237906	0	0	0	0	0	0	0	0	0	0	0	0	0	0	0	1017.18	2840.88	2.07241	0
375	0.00179793	7.8	2.8	7.143	7.143	0	17.0732	113.467	27.8097	0	0	0	10	0	0	0	1093.6	2887.73	2.04685	0.379075
376	0.0017968	23.4	3.5	0	21.429	0	0	15.8295	66.7852	0	0	0	0	0	0	0	1114.72	2875.27	2.0614	0
377	0.00179886	14.5	3.25	0	15.385	0	10.9091	17.9585	44.4727	0	0	0	0	0	0	0	1136.55	2863.19	2.075	0
378	0.00215557	14.4	3.1	6.452	12.903	0	0	17.2342	46.3914	0	0	0	0	0	0	0	1182.2	2840.21	2.09559	0.75815
379	0.000259418	0	0	0	0	0	0	0	0	0	0	0	0	0	0	0	1236.39	2907.74	2.08309	0
380	0.00018	0	0	0	0	0	5.88235	0	0	0	0	0	0	0	0	0	1259.12	2941.56	2.08309	0
381	0.000264	0	0	0	0	0	0	0	0	0	0	0	100	0	0	0	1186.46	2997.37	2.02336	0
382	0.000178838	0	0	0	0	0	0	0	0	0	0	0	0	0	0	0	1192.82	2930.19	2.06428	0
383	0.00525544	0	0	0	0	0	4.34783	0	0	0	0	0	0	0	0	0	1136.55	3027.7	2.00356	0
384	0.00458948	32.2	3.442	0	22.973	0	2.77778	8.86594	91.5137	0	0	0	0	0	0	0	1055.49	3038.3	1.92369	0
385	0.00467314	38.9	3.193	0.549	17.582	0	0	44.1387	121.974	0	0	0	0	0	0	0	1031.94	3003.04	1.90718	0.75815
386	0.000925909	20.5	3.8	0	15.789	0	0	19.0814	54.001	0	0	0	0	0	0	0	979.307	3052.57	1.85381	0
387	0.00778861	19.5	3.455	3.289	14.474	0	4.8	8.72116	56.4927	2.5	7.69	0	0	0	0	0	632.057	2020.69	2.21651	2.27445
388	0.00665103	15	3.448	2	17	0	2.32558	11.0714	43.6023	0	11.11	0	0	0	0	0	709.997	1971.76	2.27878	0.379075
389	0.00466168	17.8	2.862	3.614	18.072	0	0	68.9726	62.2094	0	50	0	0	0	0	0	746.342	2040.86	2.23198	0
390	0.00654605	13	2.833	4.706	16.471	0	0	12.0046	45.8292	0	0	0	0	0	0	0	800.913	2159.37	2.10114	3.0326
391	0.00736606	8.8	3.421	1.538	13.846	0	0	13.5246	25.794	0	0	0	0	0	0	0	793.801	2194.4	2.07783	0
392	0.0174114	0	0	0	0	0	0	0	0	0	0	0	0	0	0	0	595.086	2204.42	2.08402	0
393	0.000942557	0	0	0	0	0	6.66667	0	0	0	0	0	0	0	0	0	620.994	2077.58	2.17552	0
394	0.000207179	48.3	2.5	0	30	0	0	20.7493	193.07	0	0	0	0	0	0	0	610.762	2054.4	2.18448	0
395	0.00398427	0	0	0	0	0	2.73973	0	0	0	0	0	0	0	0	0	477.602	2135.9	2.18762	0
396	0.00385485	12.2	3.615	4.255	12.766	0	0	15.264	33.7238	0	0	0	0	0	0	0	504.548	2083.63	2.24599	0
397	0.000167147	0	0	0	0	0	0	0	0	0	0	0	0	0	0	0	493.18	2080.3	2.27939	0
398	0.000548838	0	0	0	0	0	5.26316	0	0	25	0	0	0	0	100	0	508.28	2063.88	2.31128	0
399	0.000677725	35.4	3.429	8.333	12.5	0	0	18.2656	103.287	0	0	0	0	0	50	0	494.456	2080	2.33008	0
400	0.00118489	0	0	0	0	0	0	0	0	0	0	0	0	0	25	0	527.743	2048.56	2.36223	0
401	0.000453472	0	0	0	0	0	21.7391	0	0	28.571	0	0	0	0	100	0	482.85	2096.6	2.34276	0
402	0.000354906	0	0	0	0	0	0	0	0	0	0	0	0	0	0	0	439.109	2144.73	2.30834	0
403	0.00172179	0	0	0	0	0	0	0	0	0	0	0	0	0	0	0	428.946	2143.26	2.26434	0
404	0.00153159	32.6	3.333	0	22	0	0	14.9437	97.9373	0	0	0	0	0	0	0	255.993	2318.39	2.13748	0
405	0.000325742	0	0	0	0	0	0	0	0	0	0	0	0	0	0	0	404.761	2214.97	2.11581	0
406	0.000175938	0	0	0	0	0	0	0	0	0	0	0	0	0	0	0	317.52	2327.07	1.98741	0
407	0.000182119	0	0	0	0	0	0	0	0	0	0	0	0	0	0	0	327.292	2380.87	1.95259	0
408	0.000175937	0	0	0	0	0	0	0	0	0	0	0	0	0	0	0	362.029	2368.93	1.95598	0
409	0.000320714	0	0	0	0	0	0	0	0	0	0	0	0	0	0	0	336.781	2347.56	1.98741	0
410	0.000182119	0	0	0	0	0	6.57895	0	0	3.333	0	0	0	0	0	0	382.345	2302.02	2.01371	0
411	0.000132221	0	0	0	0	0	0	0	0	0	0	0	0	0	0	0	396.9	2268.66	2.04959	0
412	0.00848798	0	0	0	0	0	0	0	0	0	0	0	0	0	0	0	494.456	2234.24	2.05825	0
413	0.00408305	0	0	0	0	0	0	0	0	0	0	0	0	0	0	0	508.28	2291.87	2.0106	0
414	0.0178615	0	0	0	0	0	0	0	0	0	0	0	0	0	0	0	682.853	2248.85	2.04064	0
415	0.0104483	7.2	3	4	14.667	0	3.44828	72.2578	22.9703	0	0	0	0	0	0	0	746.342	2305.3	1.99799	0.75815
416	0.0037905	6.3	4	0	8.333	0	0	18.2656	15.8291	0	0	0	0	0	0	0	569.106	2341.91	1.97003	0
417	0.000742401	14.8	2.75	0	27.273	0	0	20.5497	40.4094	0	0	0	0	0	0	0	496.998	2394.33	1.92849	0
418	0.00030062	0	0	0	0	0	0	0	0	0	0	0	0	0	0	0	427.475	2380.34	1.93506	0
419	0.00137861	0	0	0	0	0	0	0	0	0	0	0	0	0	0	0	462.861	2438.14	1.87775	0
420	0.000795226	0	0	0	0	0	0	0	0	0	0	0	0	0	0	0	533.68	2419.47	1.89967	0
421	0.0127077	1.2	3.75	13.333	20	0	0	112.416	3.14769	0	0	0	0	0	0	0	678.224	2422.85	1.93431	0.379075
422	0.0119889	1.3	2	12.5	12.5	0	0	19.6067	6.67283	0	0	0	0	0	0	0	697.461	2527.48	1.91893	0.379075
423	0.000337451	0	0	0	0	0	0	0	0	0	0	0	100	0	0	0	785.823	2585.65	1.95172	0
424	0.000268612	0	0	0	0	0	0	0	0	0	0	0	0	0	0	0	831.03	2615.69	1.94713	0
425	0.000266384	0	0	0	0	0	0	0	0	0	0	0	0	0	0	0	819.578	2580.52	1.95828	0
426	0.000535207	0	0	0	0	0	0	0	0	0	0	0	0	0	0	0	853.474	2575.88	1.97665	0
427	0.00745293	0	0	0	0	0	4.6875	0	0	11.111	0	0	0	0	0	0	835.567	2505.44	1.98917	0
428	0.00611287	0	0	0	0	0	0	0	0	0	0	0	0	0	0	0	853.474	2491.32	2.08338	0
429	0.00846323	9.5	3.2	1.25	25	0	0	12.3516	28.358	0	0	0	15.38	0	0	0	759.73	2485.24	2.17936	0
430	0.00219282	7.3	2.667	0	18.75	0	2.22222	111.385	27.362	0	0	0	33.33	0	0	0	730.987	2521.49	2.19685	0
431	0.00552462	12.9	3.087	2.817	22.535	0	14.2857	13.0297	41.6318	0	100	0	0	0	0	0	689.282	2449.75	2.17608	0
432	0.0293884	0	0	0	0	0	0	0	0	0	16.67	0	8.33	0	0	0	678.224	2378.75	2.10833	0
433	0.00307943	4.9	3.75	6.667	20	0	0	19.7884	12.9894	0	0	0	0	0	0	0	817.268	2364.67	2.00744	0
434	0.00473061	3.8	3.6	0	33.333	0	0	19.2533	10.5695	0	0	0	0	0	0	0	710.884	2381.4	1.94662	0
435	0.00621493	4.5	3.111	3.571	17.857	0	4.16667	17.6616	14.4813	0	28.57	0	28.57	0	0	0	582.241	2236.77	2.19376	0
436	0.00194183	10.8	3.5	0	19.048	0	0	18.7465	30.8986	0	0	0	0	0	0	0	682.853	2208.14	2.13088	0
437	0.00370153	7.3	3.857	3.704	18.519	0	2.38095	17.8088	18.9111	7.692	0	0	5.56	0	0	0	666.982	2172.75	2.14224	1.89538
438	0.00322989	14.6	3.615	0	19.149	0	0	15.264	40.249	0	0	0	10.53	0	0	0	652.657	2137.37	2.14815	1.13723
439	8.6663e-05	0	0	0	0	0	0	0	0	0	100	0	0	0	0	0	587.627	2132.65	2.17801	0
440	0.000594211	0	0	0	0	0	0	0	0	6.667	0	0	0	0	0	0	603.497	2168.11	2.17801	0
441	0.00363002	52.9	3.254	5.729	16.146	0.521	0	7.49696	162.534	0	11.76	0	5.88	5.88	0	0.2	541.882	2033.12	2.30622	2.27445
442	0.000952298	24.2	2.556	0	17.391	13.043	8.18713	18.4232	94.5082	5.085	0	0	0	66.67	0	0	555.661	2016.32	2.32945	0.379075
443	0.00371277	35.8	3.595	2.256	16.541	1.504	6.55738	9.45449	99.656	0	0	0	5	0	0	0	619.978	1952.81	2.39298	3.41168
444	0.00468537	17.3	3.682	3.704	8.642	1.235	4.9505	12.2806	46.9547	0	0	0	0	0	0	0	652.657	1921.26	2.42301	0.75815
445	0.00376784	31.3	3.105	1.695	14.407	0	9.09091	10.1267	87.5833	5	0	0	0	0	0	0	714.421	1857.56	2.4138	1.89538
446	0.00266054	23.3	3.1	0	14.516	1.613	2.0202	13.7864	67.6555	0	0	0	0	7.14	0	0	669.81	1906.77	2.38556	0.75815
447	0.00261047	28.7	4.167	5.333	10.667	1.333	7.89474	12.7193	68.9532	0	0	0	0	0	28.57	0	590.835	1986.09	2.33226	1.13723
448	0.000567483	0	0	0	0	0	2.85714	0	0	0	0	0	0	0	100	0	604.541	1990.84	2.3107	0
449	0.00192981	22.8	3.143	6.818	4.545	2.273	2.85714	15.5983	72.5461	0	0	0	0	10	40	0	632.057	1957.97	2.32922	3.0326
450	0.00196274	32.6	3.556	1.563	10.938	4.688	12	13.6107	91.7086	12.5	0	0	11.11	0	0	0	681.93	1911.73	2.3527	1.5163
451	0.00213189	31.9	3.4	0	14.706	0	7.5	13.2725	89.1227	7.692	9.09	0	0	0	0	0.27	652.657	1965.36	2.276	4.16983
452	0.0037459	25.4	3.393	1.053	9.474	1.053	7.54717	11.3659	74.7484	0	0	0	0	0	20	0	702.861	1919.95	2.30939	1.89538
453	0.00301967	26.5	3.478	5	12.5	0	9.52381	12.3516	76.1673	0	0	0	0	0	40	0	728.396	1886.51	2.33901	0.379075
454	0.00046723	40.7	2.714	0	15.789	5.263	4.87805	19.0814	128.416	7.692	0	0	0	0	0	0	689.282	1841.21	2.34996	0
455	0.00110462	50.7	3.294	1.786	12.5	7.143	0	14.3417	153.899	0	0	0	0	0	0	0	730.987	1832.63	2.4044	0
456	0.00025084	0	0	0	0	0	0	0	0	0	0	0	0	0	0	0	714.421	1799.67	2.44799	0
457	0.00188399	0	0	0	0	0	8.33333	0	0	5.405	66.67	0	0	0	66.67	0.23	702.861	1921.26	2.26144	0
458	0.000633558	34.7	3.667	4.545	9.091	0	7.69231	18.5834	94.7033	0	0	0	0	0	0	0	704.652	1897.5	2.27997	0
459	0.000566266	38.9	3.143	4.545	18.182	0	5	18.5834	123.617	0	0	0	0	0	50	0	704.652	1897.5	2.27997	0
460	0.000734729	36.7	3.375	7.407	22.222	0	0	17.8088	108.884	0	0	0	0	0	0	0	678.224	1887.18	2.26807	3.0326
461	0.000341665	0	0	0	0	0	2.5	0	0	0	50	0	0	0	0	0	678.224	1911.73	2.26144	0
462	0.00162427	46.8	3.8	2.632	14.474	0	0	12.6441	123.132	4.762	0	0	0	0	11.11	0	502.044	1849.06	2.22586	0
463	0.00173717	35.7	3.263	6.452	11.29	1.613	7.5	13.7864	109.373	0	0	0	0	0	22.22	0	427.475	1774.99	2.22117	0.379075
464	0.00175653	33.6	3.278	6.78	11.864	0	0	14.0586	102.475	0	0	0	0	0	22.22	0	431.874	1810.49	2.19806	1.13723
465	0.00175857	24.5	3.583	2.326	16.279	0	7.69231	15.713	68.2374	0	0	0	0	0	22.22	0	427.475	1845.99	2.20935	0.75815
466	0.00281251	29.9	3	9.524	14.286	0	1.50502	12.0724	99.5551	2.899	0	0	0	0	15.38	0.29	462.861	1846.33	2.19761	1.5163
467	0.00599329	23.2	3.475	1.439	15.827	0	4.49438	95.4322	65.0727	3.448	0	0	0	0	0	0	427.475	1916.99	2.20067	0.75815
468	0.0196592	13.3	3.346	2.299	17.241	0	0	6.03552	39.6762	0	40	0	0	0	13.33	0.19	404.761	1988.31	2.211	1.13723
469	0.000715215	0	0	0	0	0	0	0	0	0	0	0	0	0	0	0	215.937	1928.79	2.21203	0
470	0.00023713	0	0	0	0	0	9.62963	0	0	2.273	0	0	0	0	0	0	224.521	1964.08	2.17553	0
471	0.000253468	51.3	3.25	15.385	15.385	0	3.22581	20.1619	157.811	0	100	0	0	0	0	0	238.14	1999.37	2.16833	0.75815
472	0.000326972	0	0	0	0	0	0	0	0	0	0	0	0	0	0	0	181.014	1933.03	2.17127	0
473	0.00197066	40.6	3.636	0	15	0	18.3099	12.3516	111.638	0	0	0	11.11	0	0	0	511.986	1803.52	2.34961	4.5489
474	0.00180764	44.8	4.05	6.173	6.173	4.938	3.64964	12.2806	110.641	0	0	0	0	0	0	0	541.882	1838.47	2.33664	1.5163
475	0.00192859	37.3	3.273	9.722	4.167	0	0	12.9507	114.073	0	0	0	0	0	0	0	572.418	1873.44	2.32785	2.65353
476	0.000833371	0	0	0	0	0	9.85915	0	0	4.545	0	0	0	0	100	0	577.896	1825.4	2.31762	0
477	0.00131617	12.2	4	6.25	12.5	0	9.09091	19.6067	30.3913	0	0	0	0	0	80	0	582.241	1852.13	2.31138	0
478	0.00259043	20.5	3.313	5.66	16.981	0	0	83.149	61.7659	0	0	0	0	0	14.29	0	555.661	1867.71	2.30362	0.379075
479	0.0001775	0	0	0	0	0	0	0	0	0	0	0	0	0	0	0	619.978	1937.91	2.20592	0
480	0.00545917	18.7	3.517	4.902	20.588	0	0	10.9578	53.1216	0	0	0	0	0	0	0	585.478	1925.19	2.20592	1.13723
481	0.00953682	0	0	0	0	0	4.05405	0	0	0	0	0	0	0	0	0	494.456	1822.98	2.30568	0
482	0.00168643	44.5	3.409	1.333	21.333	1.333	0	12.7193	130.453	0	0	0	0	0	22.22	0	431.874	1778.18	2.27378	0
483	0.00164091	62.8	3.552	1.942	11.65	0	7.35294	10.9019	176.731	4.545	0	0	0	0	22.22	0	466.928	1813.62	2.24769	0
484	0.00236644	15.6	3.364	13.514	21.622	0	7.29167	16.4385	46.4833	0	0	0	0	0	0	0	181.014	2044.25	2.46246	1.13723
485	0.0019005	20.5	3.545	5.128	15.385	0	0	91.9706	57.8794	0	0	0	0	0	0	0	191.173	2043.63	2.43848	0
486	0.0015914	14.5	3.833	4.348	8.696	0	11.7647	18.4232	37.7026	0	25	0	0	0	0	0	150.613	2058.07	2.36379	1.89538
487	0.00413035	23	3.276	2.105	10.526	0	0	11.3659	67.7908	3.571	0	0	0	0	0	0	227.31	2111.57	2.39205	0.379075
488	0.0011617	17.2	4	5	25	0	6.25	18.9124	43.0403	0	0	0	0	0	0	0	238.14	2088.16	2.42139	0.75815
489	0.00134452	26.8	3.6	2.778	2.778	0	1.63934	16.566	74.3762	0	12.5	0	0	0	75	0.17	141.999	2089.97	2.44483	0.75815
490	0.00400443	23.5	3.917	5.319	13.83	3.191	9.92908	11.4267	59.9337	6.818	0	0	0	0	63.64	0	181.014	2110.97	2.44032	1.89538
491	0.00407991	33.6	3.513	0.73	13.139	1.46	6.97674	9.29004	95.5904	8.333	4.55	0	0	0	0	0	191.173	2144.44	2.42662	0
492	0.00361923	28.2	3.4	0.98	8.824	0.98	0	10.9578	82.8906	0	0	0	0	0	0	0	227.31	2211.56	2.38416	3.41168
493	0.139523	0.7	3	6.061	6.061	0	0	63.2236	2.36519	0	0	0	7.14	0	0	0.29	181.014	2394.33	2.60995	0
494	5.3499e-05	0	0	0	0	0	0	0	0	0	0	0	0	0	0	0	396.9	2274.48	2.60995	0
495	0.00224139	16.1	3.6	0	16.667	0	0	16.566	44.6153	0	0	0	33.33	0	0	0	619.978	2455.91	2.2561	0.75815
496	0.000743701	80.7	3.75	3.333	15	0	1.85185	13.9667	215.14	0	0	0	0	0	0	0	573.518	2423.37	2.29545	0
497	0.0021249	26.8	3	7.018	12.281	0	0	14.2461	89.416	0	0	0	66.67	0	0	0	461.498	2369.73	2.34727	0
498	7.07144e-05	0	0	0	0	0	0	0	0	0	0	0	0	0	0	0	392.109	2346.48	2.35295	0
499	5.25324e-05	0	0	0	0	0	2.94118	0	0	10	0	0	0	0	0	0	392.109	2346.48	2.34727	0
500	0.000311946	0	0	0	0	0	5.45455	0	0	0	0	0	0	0	0	0	362.029	2318.39	2.32353	0
501	3.99992e-06	0	0	0	0	0	0	0	0	0	0	0	0	0	0	0	319.499	2241.84	2.29014	0
502	0.00173724	22.4	3.25	0	10.256	0	5.38462	16.1893	69.0751	0	0	0	50	0	0	0	321.465	2235.36	2.29014	0
503	0.00544374	27.4	2.811	6.711	18.792	0	0	8.8293	97.3595	0	0	0	20	0	0	0	396.9	2299.56	2.30068	1.13723
504	0.00298382	35.5	3.926	0	23.585	0	1.63934	10.7375	90.4881	0	33.33	0	0	0	0	0	449.042	2324.9	2.33332	0.379075
505	0.00507236	0	0	0	0	0	13.5135	0	0	0	0	0	0	0	0	0	444.812	2281.95	2.31587	0
506	0.00490008	8.8	3.071	0	13.953	0	9.30233	15.713	28.5709	0	0	0	0	0	0	0	451.839	2203.57	2.22543	3.0326
507	0.00144853	31.8	2.706	4.348	10.87	0	8.33333	15.3738	110.457	0	0	0	0	0	0	0	462.861	2130.29	2.2262	0.379075
508	0.0024107	5.8	2.8	0	14.286	0	0	19.9734	20.7409	0	66.67	0	33.33	0	0	0	396.9	2060.21	2.19561	0
509	0.003061	0	0	0	0	0	0	0	0	0	0	0	0	0	0	0	404.761	2132.65	2.20933	0
510	0.000183159	0	0	0	0	0	0	0	0	0	0	0	0	0	0	0	334.905	2063.88	2.19464	0
511	5.28885e-06	0	0	0	0	0	0	0	0	0	0	0	0	0	0	0	327.292	2102	2.19464	0
512	0.00630381	2.1	2.167	0	15.385	0	0	20.1619	6.34537	0	0	0	28.57	0	0	0	351.431	2137.37	2.23335	0
513	0.00466149	17.6	3.417	1.22	15.854	0	0	12.2105	51.4857	0	0	0	40	0	0	0	365.493	2214.97	2.28705	0
514	0.000502355	47.8	3	0	12.5	0	0	18.2656	159.25	0	0	0	100	0	0	0	382.345	2254.45	2.30446	0
515	0.00105041	12.4	3.25	0	0	0	0	20.1619	38.0802	0	0	0	0	0	0	0	303.311	2188.93	2.28152	0
516	0.00247289	24.3	2.727	5	16.667	0	0	13.9667	88.9646	0	0	0	0	0	0	0	286.209	2200.42	2.27107	0
517	0.00214708	28.4	3.389	1.639	19.672	0	0	13.876	83.8349	0	0	0	0	0	0	0	248.499	2172.17	2.24693	0
518	0.00223584	8.5	3.8	0	15.789	0	20	19.0814	22.3629	25	0	0	0	0	0	0	191.173	2089.37	2.22427	0
519	0.000188021	0	0	0	0	0	0	0	0	0	0	0	0	0	0	0	177.499	2048.56	2.20014	0
520	0.00021023	0	0	0	0	0	2.12766	0	0	0	0	0	0	0	0	0	251.022	2073.93	2.20984	0
521	0.00131039	9.2	3	0	16.667	0	0	20.354	30.5254	0	0	0	0	0	0	0	238.14	2118.72	2.24292	1.89538
522	0.005269	9.9	3.714	0	13.462	0	4.54545	14.7375	26.5705	0	0	0	14.29	0	0	0	286.209	2148.84	2.26067	0.75815
523	0.043319	16.1	2.852	2.874	18.966	1.437	1.88679	15.3827	56.3263	0	0	0	0	0	0	0	146.37	1931.4	2.40965	0.75815
524	0.00240403	41.6	3.333	4	16	0	5.82524	62.896	124.79	0	0	0	0	0	0	0	224.521	1705.84	2.32024	0.75815
525	0.00237823	42	3.571	3	18	0	5	11.0714	117.734	3.125	0	0	0	0	16.67	0	191.173	1740.58	2.31296	3.0326
526	0.00231834	48.7	3.531	2.655	18.584	0	1.62602	10.3726	138.03	0	0	0	0	0	16.67	0	158.76	1775.35	2.30472	0.75815
527	0.00232394	47.8	3.469	0.901	18.018	0	5.49451	10.4743	137.697	10	0	0	0	0	16.67	0	127.997	1810.14	2.28793	0.379075
528	0.00232867	48.5	3.424	5.31	11.504	0	8.73016	58.926	141.712	9.524	0	0	0	0	16.67	0	100.409	1844.97	2.2865	0.75815
529	0.00157893	40.5	3.2	1.563	14.063	0	2.5	13.6107	126.668	0	0	0	0	0	62.5	0	79.3801	1879.82	2.27601	0.379075
530	0.00144335	48.5	3.333	15.714	8.571	0	0	74.4748	138.566	11.111	12.5	0	0	0	75	0	112.26	1834.01	2.35755	1.5163
531	0.00208782	48.4	3.367	0.99	15.842	0	8.79121	11.0143	143.69	6.061	0	0	0	0	18.18	0	127.997	1843.26	2.38793	0
532	0.00216717	51.2	3.364	3.604	18.018	0	6.66667	10.4743	152.272	5.263	0	0	0	0	18.18	0	158.76	1809.1	2.38207	0.379075
533	0.00219827	56.9	3.571	2.4	20	0.8	9.09091	9.80151	159.216	0	0	0	0	0	18.18	0	191.173	1774.99	2.38548	0.379075
534	0.00217717	59.3	3.395	4.651	10.078	0	6.66667	54.6783	174.538	0	0	0	0	0	0	0	224.521	1740.94	2.38748	1.5163
535	0.00641266	43.2	3.298	3.61	16.245	0.361	20.6897	59.8346	129.432	57.143	27.27	6.06	15.15	0	21.21	0	270.359	1957.97	2.38542	1.13723
536	0.00207296	37.6	3.25	0	19.231	0	7.5	12.4961	115.777	18.519	22.22	0	33.33	0	0	0	303.311	1983.23	2.41086	0
537	0.00744518	5.8	3.071	6.977	18.605	0	0	15.713	16.1178	0	20	0	0	0	0	0	415.515	2084.84	2.37178	0.75815
538	0.00354845	26.2	3.321	2.151	23.656	0	2.41935	65.2635	76.0896	0	55	0	20	25	0	0.17	461.498	2140.91	2.41159	3.0326
539	0.00127147	29.1	3.364	0	21.622	2.703	6.66667	16.4385	86.5142	0	0	0	0	0	0	0	415.515	2084.84	2.3671	0
540	0.00118137	30.5	3	5.556	22.222	0	0	16.566	101.577	0	0	0	50	0	0	0	383.99	2083.63	2.27742	0
541	0.00292406	44.5	3.333	8.462	15.385	2.308	0	9.58171	133.376	0	52.63	0	0	0	0	0	349.633	2033.43	2.34144	1.13723
542	0.00163787	0	0	0	0	0	5.88235	0	0	0	0	0	0	0	0	0	327.292	2034.67	2.26874	0
543	0.00286839	22	3.316	0	14.286	0	0	13.698	66.2392	0	0	0	0	0	0	0	305.381	2013.81	2.26434	0
544	0.00373776	16.1	3.158	3.333	15	0	0	13.9667	50.8326	0	0	0	0	0	0	0	251.022	1960.54	2.32721	1.89538
545	0.00198691	15.1	3.75	3.333	16.667	0	8.33333	17.3743	40.2636	0	0	0	0	0	0	0	227.31	1934.33	2.35506	0
546	0.00164433	42.6	3.043	8.571	12.857	0	7.22892	13.1096	139.874	3.704	0	0	12.5	0	0	0	127.997	1834.01	2.43303	0
547	0.000640879	57.7	3.364	2.703	13.514	0	15.2	16.4385	171.639	15.789	25	0	0	0	0	0	177.499	1886.84	2.38362	0
548	0.000800539	25	3.333	0	30	0	10	18.9124	74.9495	0	0	0	0	0	0	0	206.998	1913.7	2.35227	0.75815
549	0.00040353	27.3	2.75	0	0	9.091	0	20.5497	99.1251	0	100	0	0	0	0	0	191.173	1890.85	2.3633	0.75815
550	0.00385719	39.7	3.326	5.229	18.301	0	0	8.68571	114.073	0	46.15	0	3.85	0	76.92	0	215.937	1896.17	2.3486	3.0326
551	0.00045184	31	2.8	0	7.143	0	6.34921	19.9734	66.3951	4.348	66.67	0	0	0	0	0	258.443	1946.03	2.29645	0.379075
552	0.000185154	0	0	0	0	0	0	0	0	0	0	0	0	0	0	0	317.52	2018.19	2.25305	0
553	0.000201551	0	0	0	0	0	0	0	0	0	0	0	0	0	0	0	303.311	1995.9	2.2654	0
554	0.000203158	0	0	0	0	0	10	0	0	28.571	0	0	0	0	0	0	286.209	2023.8	2.22829	0
555	0.000143209	0	0	0	0	0	1.08696	0	0	6.897	0	0	0	0	0	0	292.739	1974	2.26187	0
556	0.00147017	46.3	2.957	2.941	13.235	0	0	75.4002	156.444	0	76.92	0	0	0	46.15	0	251.022	1924.21	2.30181	1.5163
557	0.000191259	0	0	0	0	0	3.15789	0	0	0	0	0	0	0	0	0	283.999	1931.4	2.27615	0
558	0.000146915	0	0	0	0	0	0	0	0	0	0	0	0	0	0	0	283.999	1910.74	2.37196	0
559	0.00426126	36.6	3.059	5.769	12.821	0.641	15.1515	8.58104	119.683	72.727	45.16	0	6.45	0	25.81	0.13	224.521	1832.29	2.37196	0.379075
560	0.00118536	0	0	0	0	0	6.25	0	0	0	0	0	0	0	0	0	258.443	1861.29	2.32218	0
561	1.18834e-05	0	0	0	0	0	0	0	0	0	0	0	0	0	0	0	238.14	1811.88	2.37196	0
562	0.0338472	0	0	0	0	0	4	0	0	0	0	0	0	0	75	0	238.14	1911.73	2.4411	0
563	0.00259792	7.3	3.167	0	5.263	0	0	19.0814	23.0954	0	80	0	0	0	0	0.27	224.521	2009.74	2.22673	0
564	0.000191428	0	0	0	0	0	0	0	0	0	0	0	0	0	0	0	238.14	2030.64	2.21034	0
565	0.00752497	5.2	3.25	2.564	15.385	0	0	16.1893	15.9469	0	0	0	0	0	0	0	327.292	2068.15	2.21091	1.5163
566	2.40382e-05	0	0	0	0	0	0	0	0	0	0	0	0	0	0	0	401.635	2110.97	2.21091	0
567	0.00821858	0	0	0	0	0	0	0	0	0	0	0	0	0	0	0	433.331	2133.83	2.39596	0
568	0.00162093	0	0	0	0	0	0	0	0	0	0	0	0	0	0	0	508.28	2185.19	2.33991	0
569	0.00111477	0	0	0	0	0	0	0	0	0	33.33	0	0	66.67	0	0	543.043	2264.21	2.37932	0
570	0.000211423	0	0	0	0	0	0	0	0	0	0	0	0	0	0	0	697.461	2436.08	2.36026	0
571	8.28459e-05	0	0	0	0	0	0	0	0	0	0	0	0	0	0	0	629.059	2384.84	2.32214	0
572	0.000666315	0	0	0	0	0	3.47826	0	0	5	0	0	0	0	0	0	724.058	2447.69	2.38534	0
573	0.000942407	0	0	0	0	0	0	0	0	0	0	0	0	0	0	0	654.585	2435.04	2.33105	0
574	0.000151438	0	0	0	0	0	0	0	0	0	0	0	0	0	0	0	543.043	2385.9	2.29167	0
575	0.000308048	0	0	0	0	0	0	0	0	0	0	0	0	0	0	0	404.761	2291.05	2.21505	0
576	0.000207487	0	0	0	0	0	0	0	0	0	0	0	0	0	0	0	349.633	2218.1	2.17022	0
577	0.000643076	0	0	0	0	0	10.7692	0	0	0	0	0	0	0	0	0	35.4998	2179.7	2.30187	0
578	0.000169117	0	0	0	0	0	0	0	0	0	0	0	0	0	0	0	106.5	2190.95	2.35637	0
579	0.000103535	0	0	0	0	0	0	0	0	0	0	0	0	0	0	0	35.4998	2177.1	2.39676	0
580	0.00182702	0	0	0	0	0	0	0	0	0	0	0	0	0	0	0	35.4998	2159.66	2.81718	0
581	0.0836571	0	0	0	0	0	8.82353	0	0	50	0	0	0	0	0	0	527.743	1765.38	2.99007	0
582	2.79995e-05	0	0	0	0	0	6.25	0	0	27.143	0	0	0	0	0	0	537.21	1813.27	3.24652	0
583	0.0380611	2.4	3.172	2.174	7.609	0	0	119.683	7.61933	0	0	0	0	0	0	0.3	745.497	1589.58	3.24652	1.13723
584	0.0010056	21.9	3.667	4.545	13.636	0	0	18.5834	59.666	0	0	0	0	0	0	0	678.224	1683.53	2.85879	0
585	0.00125945	25.4	2.667	9.375	6.25	0	6.21118	17.0962	95.2798	0	0	0	0	0	0	0	710.884	1636.46	2.86164	0
586	0.00252017	11.5	3.625	10.345	3.448	3.448	0	17.5168	31.7439	0	0	0	0	0	0	0	748.87	1619.43	2.88956	0
587	0.00163437	18.4	3.75	3.333	0	0	5.61798	98.7024	48.9484	0	0	0	0	0	0	0	819.578	1555.93	2.93094	0
588	0.00142358	8.4	3	0	8.333	0	5.88235	20.354	28.0982	11.765	0	0	0	0	0	0	823.413	1572.45	2.94807	0
589	0.00386677	15	3.222	5.172	8.621	0	0	14.1517	46.5505	0	0	0	0	0	0	0	753.065	1635.31	2.88799	0
590	4.3761e-05	0	0	0	0	0	5.34759	0	0	5.512	100	0	0	0	0	0	788.225	1910.74	2.64738	0
591	0.0562434	0	0	0	0	0	2.18978	0	0	10.204	0	0	0	0	0	0.46	964.394	1467.57	3.07749	0
592	4.96604e-05	0	0	0	0	0	0	0	0	0	0	0	0	0	0	0	817.268	1436.32	3.10363	0
593	2.04033e-05	0	0	0	0	0	1.40845	0	0	0	0	0	0	0	0	0	781.803	1363.86	3.10363	0
594	0.00197556	0	0	0	0	0	0	0	0	0	0	0	0	0	0	0	746.342	1382.67	3.10363	0
595	4.6159e-05	0	0	0	0	0	6.75676	0	0	7.692	100	0	0	100	0	0	682.853	1380.85	3.10363	0
596	5.11705e-06	0	0	0	0	0	0	0	0	0	0	0	0	0	0	0	629.059	1386.31	3.03757	0
597	0.00941469	0	0	0	0	0	8.33333	0	0	20	0	0	0	0	0	0.38	603.497	1427.96	3.13804	0
598	7.3917e-06	0	0	0	0	0	0	0	0	0	0	0	0	0	0	0	541.882	1388.58	3.13804	0
599	0.0046644	0	0	0	0	0	0	0	0	0	0	0	0	0	0	0	666.982	1469.71	3.03757	0
600	0.00788828	2	4	0	25	0	0	19.6067	5.07082	0	0	0	0	0	0	0	718.817	1486.34	2.9895	0
601	0.00195526	0	0	0	0	0	3.0303	0	0	0	0	0	0	0	0	0	639.983	2009.74	2.67459	0
602	0.00190177	0	0	0	0	0	0	0	0	0	0	0	0	0	0	0	717.94	1955.39	2.65172	0
603	0.210764	0	0	0	0	0	0	0	0	0	0	0	0	0	0	0	965.7	2164.04	3.69535	0
604	0.000753809	0	0	0	0	0	0	0	0	0	0	0	0	0	0	0	1120.92	2078.49	2.63092	0
605	0.000420702	0	0	0	0	0	0	0	0	0	0	0	0	0	0	0	1048.3	2153.82	2.62684	0
606	0.000168896	0	0	0	0	0	0	0	0	0	0	0	0	0	0	0	1081.44	2095.69	2.58486	0
607	0.00416591	51.4	3.057	1.869	19.159	0.467	2.29885	104.693	165.63	17.857	0	0	43.75	0	0	0	177.499	2121.99	2.78676	1.89538
608	0.00509562	17.3	3.52	1.136	11.364	0	0	67.0668	49.0617	0	0	0	54.55	0	0	0.14	181.014	2132.95	2.76841	0
609	0.00250904	24.7	2.818	0	12.903	0	2.12766	13.7864	87.6831	2.899	0	0	0	0	0	0	258.443	2077.58	2.77827	0
610	0.002521	36.5	3.172	5.435	6.522	1.087	1.88679	11.5503	115.034	0	0	0	50	0	0	0	206.998	2156.45	2.70818	0
611	0.00353966	26	3.172	4.348	10.87	0	4.65116	11.5503	79.1036	11.765	0	0	35.71	0	0	0	100.409	2144.73	2.70401	1.13723
612	0.003519	35	3.154	1.626	10.569	0	0	56.1974	110.827	14.286	0	0	50	0	0	0	177.499	2210.42	2.66119	0
613	0.00360484	35	3.316	1.587	11.111	0	0.869565	9.75675	105.414	5.128	0	0	35.71	0	0	0	206.998	2228.3	2.64419	1.13723
614	0.0025757	14	3	0	13.889	0	8.57143	94.1102	42.7069	4.167	0	10	10	10	0	0	255.993	2228.3	2.66059	0
615	0.00200534	0	0	0	0	0	0	0	0	63.636	0	0	0	0	0	0.23	305.381	2116.34	2.75173	0
616	0.00251402	30.2	3.619	2.632	17.105	2.632	0	12.6441	83.5314	0	0	0	20	0	0	0	227.31	2168.98	2.69906	0
617	0.00257103	24.5	3.15	9.524	23.81	0	5	13.698	77.7897	0	0	0	30	0	0	0	286.209	2102.9	2.75985	0.379075
618	0.000150755	0	0	0	0	0	2.35294	0	0	0	0	0	0	0	0	0	404.761	1957.97	2.83132	0
619	8.95152e-05	0	0	0	0	0	0	0	0	0	0	0	0	0	0	0	392.109	1932.05	2.82791	0
620	0.0004	0	0	0	0	0	0	0	0	0	0	0	0	0	0	0	319.499	1987.04	2.83132	0
621	0.000192742	0	0	0	0	0	0	0	0	0	0	0	0	0	0	0	365.493	1937.26	2.99007	0
622	0.00880334	24.5	3.429	5.556	14.815	0	9.67742	6.9146	71.5638	0	13.95	4.65	6.98	30.23	11.63	0	286.209	1783.85	2.87294	0.379075
623	0.00780651	27.9	3.114	7.798	11.468	0.459	3.65449	6.87012	88.3878	2.83	3.23	0	19.35	6.45	0	0.07	286.209	1821.6	2.81719	1.5163
624	0.00406451	39.1	3.18	6.289	13.208	0.629	6.37755	48.1679	123.016	10.606	18.18	0	31.82	9.09	0	0	292.739	1841.21	2.77015	1.5163
625	0.00270111	27.4	3.217	16.216	12.162	0	7.14286	12.7955	77.7458	8.333	13.33	0	0	13.33	0	0	303.311	1861.29	2.73436	2.27445
626	0.000548923	51	4	0	21.429	3.571	0	17.6616	127.522	0	33.33	0	0	0	0	0	227.31	2018.5	2.66459	0
627	0.00224447	24.5	3.438	5.455	7.273	0	5.7971	14.4387	71.2863	38.095	0	0	0	0	0	0	150.613	2009.43	2.71957	0
628	0.00338427	45.2	3.06	1.961	15.686	1.307	14.2857	8.68571	147.742	0	0	0	6.67	0	0	0	158.76	1960.54	2.76369	2.27445
629	0.00178516	32.5	2.9	5.172	18.966	8.621	6.53409	14.1517	112.035	7.273	0	0	0	0	0	0	146.37	1942.14	2.80823	0.379075
630	0.000351567	59.7	3.5	0	4.762	0	6.32911	18.7465	170.664	28.571	0	0	0	0	0	0	177.499	1893.51	2.84334	0
631	0.00407277	36.6	2.98	2.013	12.752	1.342	5.66038	91.488	120.311	17.647	0	0	50	0	0	0	112.26	2069.98	2.70621	0.75815
632	0.0035594	30.9	3.143	4.545	10.909	3.636	0	10.5259	98.3312	25	0	0	35.71	0	0	0	141.999	2118.72	2.64421	0.75815
633	9.21472e-05	0	0	0	0	0	5.88235	0	0	0	100	0	0	0	0	0	158.76	2058.38	2.67285	0
634	0.00251161	23.9	3.333	6.667	16.667	0	2.91262	13.9667	67.6857	17.143	0	0	20	0	0	0	238.14	2067.85	2.6219	0.75815
635	0.0025414	32.3	3.037	0	14.634	3.659	0	12.2105	106.241	0	0	0	30	0	0	0	258.443	2117.23	2.57672	0
636	0.00239092	33	3.038	7.595	11.392	0	0	12.4235	108.745	0	0	0	33.33	0	0	0	215.937	2126.73	2.58979	0.379075
637	0.000541775	0	0	0	0	0	4.08163	0	0	13.333	0	0	0	0	0	0	181.014	2107.39	2.62509	0
638	0.00123722	14.5	3	5.556	5.556	0	0	19.2533	48.4958	11.111	0	0	40	0	0	0	181.014	2167.53	2.61396	0.75815
639	0.000386766	56.9	2.75	0	13.636	4.545	0	18.5834	206.844	0	0	0	0	0	0	0	224.521	2216.4	2.61203	0
640	0.00328013	15.2	3.333	6	6	0	2.7027	154.844	45.7299	7.407	0	0	15.38	0	0	0.21	286.209	2166.65	2.53394	1.5163
641	0.00014802	0	0	0	0	0	0	0	0	0	0	0	0	0	0	0	356.769	2265.6	2.53394	0
642	0.00018	0	0	0	0	0	4.54545	0	0	0	0	0	0	0	0	0	392.109	2286.37	2.41969	0
643	0.000113371	0	0	0	0	0	0	0	0	0	0	0	0	0	0	0	461.498	2300.93	2.41969	0
644	0.00010525	104.5	1.833	9.091	0	0	0	20.5497	380.047	0	100	0	0	0	0	0	498.264	2295.44	2.38589	0.75815
645	0.000164341	0	0	0	0	0	9.09091	0	0	25	0	0	0	100	0	0	498.264	2295.44	2.38589	0
646	0.00112329	56.1	3.938	0	17.46	0	7.27273	13.698	142.439	0	0	0	33.33	0	0	0	508.28	2240.99	2.38589	0
647	7.66259e-05	0	0	0	0	0	4.7619	0	0	42.857	100	0	0	0	0	0	466.928	2245.49	2.37546	0
648	0.00187422	12.8	3.429	0	20.833	0	0	18.2656	37.349	0	40	0	0	20	0	0	473.627	2218.1	2.37546	0
649	0.00138309	23.9	4.714	0	27.273	0	0	16.9605	50.6113	0	33.33	0	0	55.56	0	0	449.042	2168.11	2.39807	1.5163
650	0.00624157	0	0	0	0	0	1.75439	0	0	0	20	0	0	20	0	0	404.761	2173.33	2.42912	0
651	0.0141593	28.5	3.148	5.955	14.144	0	0	24.4704	89.6937	62.5	6.78	47.46	20.34	1.69	5.08	0.1	305.381	1931.4	2.6666	1.5163
652	0.0114942	31.9	2.984	4.087	14.714	0.817	14.5455	26.3857	101.791	25	6.12	38.78	14.29	0	51.02	0.08	370.629	1896.17	2.61655	1.89538
653	0.00440043	23.4	3.219	3.883	11.65	0	9.30233	10.9019	72.7202	0	16.67	29.17	4.17	0	41.67	0.08	354.998	2023.8	2.55479	0.75815
654	0.00197514	39	3.208	6.494	15.584	0	6.56716	12.5697	121.51	7.692	33.33	16.67	0	0	41.67	0	404.761	2018.19	2.51363	0.75815
655	0.00179034	7.3	2.6	23.077	7.692	0	0	20.1619	27.9276	0	11.11	55.56	0	22.22	0	0.27	392.109	2013.81	2.48766	0
656	0.000121166	0	0	0	0	0	2.52101	0	0	10.526	0	0	0	0	0	0	356.769	1987.04	2.46455	0
657	0.00187402	30.4	3.167	8.772	3.509	1.754	4.5977	14.2461	85.3779	10.345	18.18	72.73	18.18	0	72.73	0	354.998	1963.75	2.50271	1.13723
658	0.00206666	40.2	3.458	3.614	19.277	0	12.3711	12.1411	116.129	9.375	33.33	33.33	0	0	100	0	319.499	1936.94	2.50685	1.13723
659	0.0024148	19.9	3.2	4.167	10.417	0	0	86.0984	53.8347	0	0	45.45	0	36.36	100	0.13	286.209	1886.84	2.55694	3.0326
660	0.0176503	21.6	3.131	4.974	13.874	2.618	6.12245	46.6068	62.322	5.882	22.83	44.57	4.35	7.61	35.87	0.12	224.521	1810.14	2.6419	7.20243
661	0.00106324	31	2.75	9.091	21.212	0	0	16.9605	112.862	0	57.14	28.57	14.29	0	100	0	292.739	1863.66	2.56852	3.0326
662	0.0156161	27.7	3.115	4.619	14.781	0.924	7.42574	4.06177	84.5283	18.841	21.18	58.82	4.71	15.29	82.35	0.19	286.209	1641.08	2.79673	4.16983
663	0.0020364	32.9	3.19	5.97	14.925	2.985	17.8571	13.3555	88.3913	66.667	46.15	69.23	0	23.08	23.08	0.17	327.292	1696.95	2.73863	0
664	0.00197739	18.7	3.083	13.514	5.405	0	3.47222	93.386	55.6288	8	36.36	63.64	0	27.27	27.27	0.23	354.998	1675.65	2.77573	0.75815
665	0.00250305	42.7	3.963	0.935	20.561	0	0	10.6838	103.873	0	43.75	62.5	6.25	6.25	75	0.11	321.465	1513.64	2.70193	1.5163
666	0.00369711	37.1	3.425	7.299	11.679	0	10.7914	9.29004	102.783	15.556	39.13	65.22	8.7	26.09	95.65	0	286.209	1536.37	2.67279	0.379075
667	0.00527424	28.3	3.17	1.342	12.752	0.671	7.14286	8.8293	85.3204	0	37.84	81.08	0	2.7	78.38	0	215.937	1583.23	2.65383	1.13723
668	0.00216794	28.1	3.211	3.279	18.033	3.279	13.9535	13.876	83.0281	0	30.77	53.85	0	0	76.92	0	212.999	1557.14	2.656	1.5163
669	0.00617686	24.4	3.146	7.947	12.583	2.649	0	49.7475	76.0904	12.5	27.03	64.86	0	18.92	70.27	0.29	146.37	1631.83	2.63704	2.27445
670	0.0039652	19.2	3.04	3.947	14.474	0	12.2449	12.6441	60.5266	0	0	77.78	5.56	11.11	100	0.43	112.26	1656.74	2.64595	3.41168
671	0.00332094	17.8	3.471	1.695	13.559	0	14.7059	145.673	51.1903	4.167	0	68.75	12.5	0	0	0.23	112.26	1607.32	2.64845	1.89538
672	0.00736961	12.3	3.033	8.791	14.286	1.099	3.33333	120.333	39.3508	5.263	0	0	17.86	0	0	0.36	177.499	1536.37	2.67921	0.75815
673	8.41026e-06	0	0	0	0	0	7.07071	0	0	0	0	0	0	0	0	0	35.4998	1683.53	2.67921	0
674	0.0119012	24	3.075	2.448	16.084	0.699	7.69231	84.8017	75.6227	0	33.33	8.77	1.75	1.75	43.86	0.22	112.26	1813.62	2.46062	0
675	0.00235175	23	3	7.407	11.111	0	14.4578	82.5832	76.5388	13.793	25	0	0	0	83.33	0.15	158.76	1774.99	2.43423	0.75815
676	0.0035848	26.2	2.686	9.574	14.894	3.191	0	11.4267	94.8449	0	5.56	0	5.56	0	0	0.52	150.613	1725.31	2.48661	0.75815
677	0.00457284	22.3	3.517	6.863	5.882	0	5.26316	62.2507	56.8574	0	0	0	11.76	0	0	0.11	70.9997	1663.58	2.56454	0.379075
678	0.00419931	19.3	3.375	2.469	14.815	0	0	12.2806	54.7709	0	0	0	6.25	0	25	0	181.014	1569.24	2.63321	0
679	0.00325708	33.8	3.143	6.364	13.636	4.545	2.66667	10.5259	101.318	13.043	0	0	33.33	0	0	0	258.443	1498.16	2.67647	1.5163
680	0.00271673	37.5	3.643	2.941	7.843	1.961	0	10.9578	103.065	0	0	0	36.36	0	27.27	0	251.022	1526.91	2.64263	0
681	0.00426086	30	3.282	3.906	14.844	0	2.9703	9.66844	89.1839	14.286	0	0	12.5	0	0	0	177.499	1597.49	2.58399	0.379075
682	0.00335645	8.3	2.545	7.143	10.714	0	8.08081	17.6616	32.7727	7.692	0	0	7.69	0	23.08	0	112.26	1668.87	2.54275	0.379075
683	0.00450949	38.6	3.48	4.598	26.437	0	5.6213	8.00246	108.66	4.425	0	0	29.41	0	0	0	191.173	1654.84	2.51867	1.5163
684	0.00369516	36.3	3.116	4.478	11.194	0	8.69565	9.41284	116.368	7.143	0	0	40	0	0	0	251.022	1585.22	2.56453	0
685	0.00251717	13.9	2.917	5.714	5.714	0	12	16.6954	47.6725	25	0	18.18	0	0	0	0	303.311	1625.65	2.51087	0.75815
686	0.0029992	39	3.343	2.564	21.368	0.855	3.47222	10.175	116.698	12.245	0	0	25	0	0	0	255.993	1693.61	2.45557	0
687	0.00202599	39	3.435	1.266	11.392	0	1.6	12.4235	113.525	13.953	0	0	28.57	0	42.86	0	286.209	1704.73	2.4294	2.27445
688	0.00171542	33.2	3.8	8.772	15.789	0	2.73973	14.2461	87.442	8.696	12.5	25	12.5	25	0	0	270.359	1686.52	2.43639	0
689	0.00730196	0	0	0	0	0	0	0	0	0	16.67	0	0	0	83.33	0.52	206.998	1748.16	2.69463	0
690	0.00129479	50.2	3.25	3.077	20	0	0	13.5246	146.742	11.111	0	0	0	0	0	0	305.381	1562.4	2.53099	0.75815
691	0.0012962	20.8	3.857	0	7.407	0	0	17.8088	54.0038	0	0	0	0	0	0	0	277.263	1595.52	2.50337	0
692	0.00125877	56.4	3.55	1.408	12.676	0	5.17241	13.0297	158.886	0	0	0	0	0	28.57	0	277.263	1595.52	2.49297	3.0326
693	0.00138607	16.6	3.286	8.696	4.348	4.348	4	18.4232	50.5023	33.333	0	0	0	0	28.57	0	251.022	1628.74	2.45468	0.379075
694	0.00122731	21.2	3.25	0	15.385	0	3.0303	17.9585	65.183	0	0	0	16.67	16.67	66.67	0	200.817	1674.52	2.41266	0.379075
695	0.00112659	26.6	3.75	0	10	0	6.15385	17.3743	71.011	0	0	0	0	0	50	0	206.998	1695.47	2.40489	1.13723
696	0.0011231	26.7	3.333	0	6.667	0	0	17.3743	80.1355	0	0	0	0	0	66.67	0	191.173	1728.96	2.40661	0
697	0.00125098	18.4	3.286	8.696	8.696	0	0	18.4232	55.9561	0	0	0	0	0	66.67	0	158.76	1740.94	2.41126	0.75815
698	0.00290691	24.8	3	2.778	8.333	0	5.40541	12.9507	82.5619	0	0	0	0	0	57.14	0	146.37	1774.28	2.41339	0.379075
699	0.00148676	26.2	3.545	2.564	12.821	0	9.09091	91.9706	73.9862	0	0	0	0	0	28.57	0	141.999	1807.71	2.40447	0
700	0.000391297	35.8	3.5	0	7.143	0	0	19.9734	102.224	0	0	0	0	50	0	0	106.5	1819.86	2.41744	0
701	0.00379429	25.6	3.031	5.155	7.216	0	10.3448	11.2463	84.3374	5.263	0	0	0	0	64.71	0	79.3801	1799.67	2.41298	1.13723
702	0.00206712	13.1	3.857	3.704	3.704	0	14.2857	17.8088	33.8635	0	0	0	0	0	50	0	106.5	1762.88	2.38558	0
703	0.00110789	21.7	3.429	0	4.167	4.167	0	18.2656	63.1832	9.091	0	0	0	0	50	0	100.409	1766.81	2.41064	0
704	0.00124737	27.3	3.778	5.882	11.765	0	3.33333	16.8269	72.1521	12.5	0	0	0	0	66.67	0	127.997	1753.56	2.41263	0
705	0.00120506	31.5	3.455	5.263	7.895	2.632	4	16.313	91.2816	0	0	0	0	0	66.67	0	177.499	1687.64	2.40634	0.379075
706	0.00121653	28.8	2.917	2.857	5.714	0	13.0435	16.6954	98.6416	0	0	0	0	0	0	0	158.76	1701.4	2.39747	0
707	0.00296752	19.2	3.8	3.509	14.035	0	1.5873	14.2461	47.1774	0	0	0	0	0	0	0.11	141.999	1730.78	2.38374	0.379075
708	0.00163047	14.7	3	0	12.5	0	2.32558	18.2656	49.0655	18.182	0	0	0	0	37.5	0	215.937	1683.16	2.42189	0.75815
709	0.00150264	28.6	3.909	0	9.302	4.651	13.2075	15.713	73.2044	0	0	0	0	0	50	0	215.937	1651.41	2.45488	4.92798
710	0.00138275	20.2	2.8	3.571	10.714	3.571	4.34783	17.6616	65.0875	4.167	0	0	0	0	57.14	0	206.998	1654.84	2.44334	0
711	0.0020115	31.3	3.316	4.762	14.286	6.349	0	13.698	94.4568	28.571	0	0	0	0	0	0	238.14	1622.15	2.47975	0
712	0.00113736	50.1	3.8	5.263	12.281	0	12.3077	14.2461	131.884	0	0	0	0	0	33.33	0	336.781	1524.84	2.58263	1.89538
713	0.00131875	48.5	3.556	1.563	9.375	0	7.69231	13.6107	136.493	0	0	0	0	0	0	0	334.905	1529.38	2.57886	1.5163
714	0.00270303	30.3	3.154	3.659	12.195	2.439	0	12.2105	96.1884	0	0	0	0	0	0	0	317.52	1542.92	2.56135	0.75815
715	0.0020392	35.8	3.318	1.37	20.548	0	1.92308	12.8726	107.885	0	42.86	0	0	0	28.57	0	270.359	1589.58	2.51536	0.75815
716	0.00356535	27.5	2.8	8.163	12.245	3.061	5.55556	11.1874	95.3622	3.125	0	0	5.26	0	36.84	0	248.499	1635.31	2.47029	1.5163
717	0.0019785	30.3	3.529	5	8.333	0	5.83333	13.9667	85.9238	39.474	0	0	0	0	0	0	286.209	1587.6	2.51829	0.75815
718	0.00156445	26.2	3.417	4.878	9.756	2.439	6.45161	15.9476	76.7044	0	0	0	0	0	0	0	286.209	1620.6	2.47963	0
719	0.00185023	20.5	2.923	0	18.421	0	1.69492	16.313	70.2616	0	0	0	0	0	0	0	354.998	1541.28	2.54206	1.89538
720	0.0050702	24.7	3.289	4	11.2	0.8	0	9.80151	74.9478	7.692	0	0	0	0	0	0.08	390.498	1510.31	2.58708	4.16983
721	0.00274126	36.5	3.333	3	11	2	6.89655	11.0714	105.791	0	0	0	7.14	0	0	0	425.998	1461.97	2.61369	0
722	0.0024248	33.8	3.417	7.317	10.976	0	5.71429	69.3668	98.9772	10	0	0	16.67	0	0	0	354.998	1497.74	2.62855	0.379075
723	0.00239755	36.7	3.667	6.818	11.364	0	6.12245	11.8056	100.102	0	0	0	0	0	30.77	0	476.28	1384.49	2.73238	1.89538
724	0.00303716	30.9	3.481	1.064	14.894	0	23.0769	11.4267	85.6063	100	0	0	0	0	0	0	449.042	1413.32	2.66808	0
725	0.00314089	31.5	3.094	4.04	11.111	2.02	2.66667	63.2236	101.882	4.167	0	0	0	0	10.53	0.14	428.946	1431.04	2.67267	0
726	5.21812e-05	0	0	0	0	0	0	0	0	0	100	0	0	0	0	0	413.996	1450.29	2.60588	0
727	0.00152053	38.8	2.95	3.39	16.949	0	20.8178	14.0586	131.533	12.121	0	0	0	0	0	0	365.493	1496.48	2.60588	3.0326
728	0.00108134	38.8	3.5	0	11.905	0	0	15.8295	101.726	0	0	0	0	0	0	0	370.629	1492.68	2.60516	0
729	0.00279872	51.5	3.064	5.556	13.889	0.694	7.24638	51.217	164.361	5.556	0	0	0	0	0	0	248.499	1687.64	2.36079	0.75815
730	0.000192507	0	0	0	0	0	26.4706	0	0	15.385	0	0	0	0	20	0	238.14	1683.91	2.39806	0
731	0.00213655	51	3.406	5.505	15.596	0	0	10.578	149.774	0	0	0	0	0	18.18	0	286.209	1662.82	2.37497	2.65353
732	0.000773405	45.3	3.5	2.857	14.286	0	2.78481	16.6954	129.298	2.308	0	0	0	0	0	0	286.209	1644.53	2.36388	1.13723
733	0.00196759	50.3	3.094	2.02	16.162	6.061	0	11.1291	162.635	0	0	0	0	0	20	0	317.52	1628.74	2.41384	4.5489
734	0.0017661	45.3	3.2	2.5	17.5	1.25	0	12.3516	141.555	0	0	0	0	0	0	0	356.769	1575.65	2.43766	0.379075
735	0.00126422	43.5	3.056	14.545	9.091	1.818	17.5439	14.4387	142.38	15.789	0	0	0	0	0	0.19	305.381	1605.36	2.46596	0.75815
736	0.00136816	48.2	3.474	0	24.242	3.03	0	13.4395	138.873	0	14.29	0	0	0	0	0	327.292	1571.65	2.50213	0
737	0.00181307	49.6	3.462	4.444	12.222	0	5	11.6765	143.403	7.143	0	0	0	0	0	0	392.109	1541.28	2.46231	0.379075
738	0.000180891	0	0	0	0	0	6.25	0	0	0	0	0	0	0	0	0	396.9	1532.67	2.55403	0
739	0.00114698	41.8	3.2	0	10.417	12.5	4.78469	15.1557	130.778	2.174	0	0	0	0	0	0	427.475	1506.97	2.49736	0.379075
740	0.000696134	48.8	3.4	5.882	14.706	0	0	16.8269	143.65	0	0	0	0	0	0	0	377.369	1526.91	2.51548	0.379075
741	0.000204262	0	0	0	0	0	1.53846	0	0	9.091	0	0	0	0	0	0	351.431	1538.01	2.52254	0
742	0.00214659	42.9	3.067	2.174	15.217	0	7.84314	11.5503	139.756	5.263	0	0	0	0	18.18	0	251.022	1696.95	2.36935	1.13723
743	0.00241467	57.2	3.286	3.623	15.217	0	5.17241	9.24981	173.937	10	0	0	0	0	25	0	224.521	1705.84	2.33179	0
744	0.00789397	42.2	3.398	2.703	13.514	1.502	6.32911	5.01533	122.879	0	3.45	0	0	0	0	0.18	238.14	1466.28	2.45994	1.13723
745	0.00149148	44.3	3.667	0	13.636	3.03	0	13.4395	120.685	0	0	0	0	0	25	0	200.817	1494.79	2.35265	0
746	0.00147409	35.3	3.467	5.769	11.538	1.923	7.59494	14.7375	101.758	0	0	0	0	0	0	0	227.31	1530.2	2.31725	0
747	0.00143218	57.3	3.037	7.317	19.512	1.22	0	12.2105	181.541	0	0	0	0	0	87.5	0	255.993	1565.62	2.29352	0.379075
748	0.00155182	50.9	3.762	0	21.519	0	0	12.4235	135.325	0	0	0	0	0	0	0	286.209	1601.04	2.27323	0
749	0.00153376	43	3.474	3.03	21.212	0	1.5625	13.4395	123.879	10	0	0	0	0	0	0	334.905	1639.16	2.24704	0.379075
750	0.00170407	42.3	3.6	1.389	18.056	0	4.3956	12.9507	117.366	3.571	0	0	0	0	0	0	351.431	1611.63	2.28872	1.5163
751	0.00175457	42.7	3.571	5.333	5.333	0	10.9756	12.7193	119.687	0	0	0	0	0	22.22	0	351.431	1611.63	2.30053	0.75815
752	0.00171503	36.2	3.875	1.613	16.129	0	0	13.7864	87.4621	0	0	0	0	0	0	0	327.292	1576.45	2.32858	0
753	0.000372653	0	0	0	0	0	5.47945	0	0	0	0	0	0	0	0	0	336.781	1594.33	2.37643	0
754	0.00175057	43.4	3.8	3.947	14.474	0	5.06329	12.6441	114.249	1.942	0	0	0	0	0	0	305.381	1541.28	2.36738	0.379075
755	0.00169916	39.4	3.722	2.985	10.448	0	4	13.3555	105.935	0	0	0	0	0	22.22	0	286.209	1506.13	2.40495	0.75815
756	0.00151784	40.8	3.263	3.226	1.613	0	0	13.7864	125.178	0	11.11	0	0	0	0	0	354.998	1674.52	2.22336	4.5489
757	0.00144007	50.7	3.476	2.74	8.219	2.74	3.9604	12.8726	145.826	0	0	0	0	0	0	0	327.292	1646.83	2.24795	1.13723
758	0.00266088	37.2	3.536	5.051	19.192	0	8.33333	11.1291	105.228	0	0	0	0	0	66.67	0	354.998	1674.52	2.21192	1.13723
759	4.8049e-05	0	0	0	0	0	2.1978	0	0	0	0	0	0	0	0	0	255.993	1692.49	2.24613	0
760	0.00210746	34.6	3.318	1.37	10.959	0	5.14706	12.8726	104.391	1.053	0	0	0	0	0	0	251.022	1722.02	2.24613	3.79075
761	0.00152171	52.6	3.636	5	6.25	0	6.31579	12.3516	144.574	0	0	0	0	0	0	0	334.905	1709.9	2.1918	0
762	0.000188774	0	0	0	0	0	3.57143	0	0	0	0	0	0	0	0	0	382.345	1740.94	2.21922	0
763	0.00212372	35.8	3.04	13.158	9.211	0	9.83607	12.6441	117.718	0	0	0	0	0	16.67	0	349.633	1742.75	2.18927	5.68613
764	0.00188602	43.5	3.154	2.439	17.073	0	8.77193	12.2105	132.554	0	0	0	0	0	20	0	227.31	1757.15	2.24668	1.13723
765	0.00122942	37.4	3.286	2.174	13.043	2.174	7.0922	15.3738	113.875	4.762	0	0	0	0	0	0	238.14	1787.73	2.20456	2.65353
766	0.00149793	42.1	3.15	3.175	15.873	0	9.78261	13.698	133.518	3.571	0	0	0	0	22.22	0	303.311	1780.66	2.20347	2.65353
767	0.00445642	50.7	3.424	4.867	14.159	0	3.73134	6.69781	143.613	0	8.7	0	0	0	13.04	0.08	258.443	1819.17	2.20154	4.5489
768	0.00225935	55.3	3.571	4.8	11.2	2.4	11.1111	9.80151	146.06	8.333	7.69	0	0	0	23.08	0.12	321.465	1849.06	2.20201	1.13723
769	0.00156858	37	3.412	10.345	15.517	3.448	5.11182	14.1517	102.003	0	0	0	0	0	0	0	191.173	1827.47	2.20674	0
770	0.00311035	44.4	3.366	5.072	13.768	0.725	7.72947	9.24981	128.603	1.563	0	0	0	0	0	0	181.014	1862.64	2.18998	0.75815
771	0.00170788	47.4	3.115	1.235	13.58	1.235	0	69.7655	152.235	0	0	0	11.11	0	22.22	0	319.499	1884.5	2.20084	0
772	0.00889454	33.6	3.322	3.679	15.05	2.341	3.40909	30.9633	98.9371	3.571	10	0	6.67	0	0	0.15	292.739	1636.46	2.37821	1.5163
773	0.00178981	29.6	3.118	16.981	22.642	1.887	4.51128	14.6365	94.982	2.174	0	0	0	0	0	0	370.629	1709.9	2.34859	0
774	0.00158784	30.9	3.5	0	30.612	0	7.89474	15.0489	88.1701	1.316	0	0	0	0	0	0	370.629	1709.9	2.34859	1.89538
775	0.0017949	40.1	3.789	0	15.278	2.778	0	12.9507	105.855	0	0	0	0	0	0	0	396.9	1742.75	2.30902	0.379075
776	0.0018001	43.9	3.762	2.532	20.253	0	8.77193	12.4235	116.66	0	0	0	0	0	22.22	0	392.109	1739.49	2.25034	0
777	0.0014433	29.1	3.5	2.381	19.048	0	3.125	15.8295	83.1429	0	0	0	0	0	0	0	356.769	1705.47	2.31182	0.75815
778	0.00161668	32.8	3.533	5.66	11.321	0	5.49451	83.149	92.7829	3.571	0	0	0	0	0	0	321.465	1670	2.3239	0
779	0.00349614	43.8	3.122	3.268	15.686	1.961	1.96721	8.68571	137.294	2.049	0	0	16.67	0	0	0	321.465	1668.49	2.30237	0.75815
780	0.00817822	76.1	8.761	0.965	5.466	0.804	3.1746	16.9749	84.3705	0	0	0	21.43	0	0	0.22	270.359	1599.07	2.35168	0
781	0.00266809	3.4	2.25	0	11.111	33.333	9.80392	20.9528	14.992	0	0	0	0	0	0	0	351.431	1622.54	2.45483	0
782	0.00428507	58.1	3.276	6.024	13.253	0.803	5.9322	6.24732	177.36	3.03	0	0	0	0	0	0	404.761	1692.49	2.43219	0
783	0.000819368	50	3.154	2.439	7.317	0	0	15.9476	158.659	0	0	0	0	0	0	0	413.996	1722.02	2.39613	1.89538
784	0.000788494	52	3.727	4.878	14.634	2.439	3.22581	15.9476	139.506	0	0	0	0	0	0	0	433.331	1727.5	2.41149	1.13723
785	0.000757478	50.2	3.455	7.895	15.789	0	0	16.313	145.219	0	0	0	0	0	0	0	444.812	1757.15	2.37978	0.379075
786	0.000791933	66.9	3.533	0	16.981	1.887	5.26316	14.6365	189.41	0	0	0	0	0	0	0	462.861	1762.52	2.38096	0
787	0.00728842	0	0	0	0	0	8.77193	0	0	0	0	0	0	0	0	0	477.602	1740.58	2.44071	0
788	0.00727902	0	0	0	0	0	4	0	0	6.667	83.33	0	0	0	0	0	383.99	1601.83	2.51035	0
789	0.00174398	41.9	3.842	0	12.329	0	2.5	12.8726	108.946	0	0	0	0	0	0	0	461.498	1594.73	2.42298	0.379075
790	0.00192104	27.1	3.714	3.846	7.692	0	0	14.7375	72.8771	0	0	0	0	0	0	0	524.149	1673.02	2.39461	0
791	0.00203412	20.2	2.929	0	7.317	0	13.6364	15.9476	68.8259	0	0	0	0	0	0	0	444.812	1619.04	2.43457	0
792	0.0018372	37	3.091	4.412	2.941	0	2.17391	75.4002	119.747	7.692	0	0	0	0	0	0	482.85	1687.64	2.43125	0.379075
793	0.00238066	20.6	3.769	4.082	10.204	0	0	15.0489	54.6068	0	0	0	0	0	0	0	541.882	1706.95	2.38075	0.379075
794	0.00302056	14.2	3.308	2.326	16.279	0	2.5	15.713	43.0384	4.545	5.88	0	0	0	0	0	561.302	1740.94	2.35049	0.379075
795	0.00291743	27.8	3.682	2.469	8.642	0	0	12.2806	75.4089	0	0	0	0	0	0	0	604.541	1809.1	2.31313	0.75815
796	0.000820199	20.7	3.4	0	11.765	0	2.15054	110.372	60.9608	0	0	0	0	0	0	0	602.452	1834.01	2.30672	0
797	0.00100565	24.9	3.125	4	12	0	2.08333	18.1108	79.5505	0	0	0	0	0	0	0	552.248	1790.9	2.35521	0
798	0.00183945	59.3	3.406	4.587	14.679	0.917	4.65116	10.578	173.965	0	0	0	0	0	0	0	527.743	1756.44	2.38536	0.379075
799	0.00180535	55.4	3.571	2	17	2	6.48148	11.0714	155.094	0	0	0	10	0	0	0	504.548	1722.02	2.40594	0.75815
800	0.00328325	51.5	3.449	1.183	18.343	1.775	2.08333	8.1552	149.242	0	0	0	0	0	13.33	0	286.209	1420.88	2.54782	0
801	0.00150294	35.3	3.313	1.887	9.434	0	0	14.6365	106.458	0	0	0	0	0	16.67	0	258.443	1448.12	2.51057	0
802	0.00141586	31.8	3.214	4.444	17.778	0	7.14286	15.4853	98.88	0	0	0	0	0	33.33	0	362.029	1472.71	2.51777	1.5163
803	0.000663662	0	0	0	0	0	3.07692	0	0	5.263	0	0	0	0	0	0	427.475	1459.38	2.56833	0
804	0.0017963	25.1	3.75	6.667	11.111	0	1.16732	15.4853	66.8039	0	0	0	0	0	40	0	431.874	1493.11	2.5261	1.89538
805	0.00243852	35.7	3.107	1.149	16.092	0	4.7619	11.8712	114.824	36.364	0	0	9.09	0	27.27	0	439.109	1526.91	2.48279	2.65353
806	0.00160471	26.2	3.5	0	11.905	0	3.125	15.8295	74.7797	0	0	0	0	0	0	0	449.042	1560.78	2.43883	0.379075
807	0.00131324	40.4	3.533	1.887	15.094	0	4.34783	14.6365	114.221	0	0	0	0	0	28.57	0	349.633	1532.67	2.46799	2.27445
808	0.00127082	31.5	3.333	0	12.5	0	0	16.0676	94.427	0	0	0	0	0	20	0	336.781	1498.16	2.47222	0
809	0.00137713	47.9	3.474	4.545	13.636	1.515	4.69799	13.4395	137.968	0	0	0	0	0	28.57	0	370.629	1506.97	2.47766	0.75815
810	0.00152715	30.1	3.067	2.174	10.87	2.174	5.55556	15.3738	98.2221	0	0	0	0	0	25	0	258.443	1448.12	2.50679	1.13723
811	0.00146732	34.1	3.125	8	22	4	3.38983	14.9437	109.042	6.061	0	0	0	0	16.67	0	270.359	1482.94	2.47916	1.13723
812	0.00146575	40.9	3.158	6.667	11.667	3.333	1.94175	13.9667	129.626	0	0	0	0	0	25	0	286.209	1517.8	2.47384	0.75815
813	0.000635055	34.6	3.667	0	18.182	0	5.81395	18.5834	94.4801	3.226	0	0	0	0	0	0	277.263	1546.59	2.46515	0.379075
814	0.000617498	71.3	4.4	0	11.364	0	8.69565	15.5983	161.944	0	0	0	0	0	0	0	277.263	1546.59	2.45243	0
815	0.000620602	50	3.1	6.452	12.903	0	1.92308	17.2342	161.134	0	0	0	0	0	0	0	301.226	1581.64	2.45697	1.13723
816	0.000616946	63.2	3.545	2.564	12.821	0	0	16.1893	178.298	0	0	0	0	0	0	0	354.998	1594.33	2.46336	3.0326
817	0.000596234	73.8	3.385	4.545	20.455	0	8	15.5983	218.035	0	0	0	0	0	0	0	354.998	1594.33	2.46336	1.89538
818	0.000656341	53.3	3.182	2.857	5.714	0	3.4188	16.6954	167.596	5.714	0	0	0	0	0	0	334.905	1559.57	2.46838	0.379075
819	0.00412354	29.6	2.652	0.82	20.492	0.82	5.66038	9.9383	106.704	5.556	0	0	0	0	0	0	714.421	1857.56	2.41415	0
820	0.00168914	33.2	3.111	3.571	10.714	1.786	2.63158	14.3417	106.563	0	0	0	0	0	0	0	764.69	1795.11	2.43067	0.75815
821	0.00320259	34.7	3.265	2.703	17.117	0	1.81818	10.4743	106.164	0	0	0	0	0	0	0	764.69	1810.49	2.45364	1.13723
822	0.000672194	50.6	3.778	5.882	11.765	0	0	16.8269	133.89	0	0	0	0	0	100	0	718.817	1748.16	2.42545	0
823	0.00632583	24.3	3.581	0.649	10.39	3.896	0	8.65054	66.3945	0	0	0	0	0	23.53	0	731.848	1698.81	2.41863	5.30705
824	0.00297225	27.9	3.074	10.843	18.072	1.205	9.67742	12.1411	90.8404	0	0	0	0	0	28.57	0	753.065	1651.79	2.50202	0
825	0.00301659	25.2	3.455	3.947	14.474	0	3.84615	12.6441	72.93	0	0	0	0	0	25	0	654.585	1636.46	2.43164	0.379075
826	0.00292489	25.6	3.75	1.333	16	2.667	6.66667	12.7193	68.3786	6.061	0	0	0	0	37.5	0	682.853	1619.43	2.45781	0.75815
827	0.000974349	54.4	4.077	1.887	13.208	5.66	0	14.6365	133.422	0	0	0	0	0	0	0	585.478	1608.5	2.42227	0.379075
828	0.000467372	85.6	2.667	2.5	15	0	4.25532	16.0676	320.944	0	0	0	0	0	0	0	527.743	1616.71	2.41044	1.5163
829	0.000517211	58	3.75	0	20	6.667	0	17.3743	154.676	0	0	0	0	0	0	0	540.718	1650.27	2.40996	0
830	0.000990011	55.6	3.667	1.818	21.818	0	7.89474	14.4387	151.513	4.545	0	0	0	0	0	0	595.086	1641.46	2.41535	1.13723
831	0.00187164	51.8	3.731	3.093	10.309	0	1.96078	11.2463	138.915	7.143	0	0	0	0	100	0	573.518	1662.06	2.41578	2.65353
832	0.00454803	25.7	3.079	5.983	12.821	1.709	4.41176	10.175	83.5527	0	0	0	0	0	0	0	619.978	1707.69	2.41331	1.89538
833	0.0049578	26.6	3.771	1.515	15.152	0.758	7.6087	9.49652	66.5618	7.143	0	0	0	0	0	0	635.041	1740.94	2.39191	0.75815
834	0.00190254	35.2	3.526	1.493	11.94	0	20	13.3555	99.8666	7.143	9.09	0	18.18	0	0	0	567.998	1477.83	2.58035	0.75815
835	0.00265721	24.5	3.25	1.538	12.308	0	6.47059	76.8323	71.5035	0	0	0	0	0	0	0.11	639.983	1476.55	2.58273	0
836	0.00326632	59.1	3.328	2.591	18.653	2.591	5.45455	42.4408	174.508	0	0	0	40	0	0	0	604.541	1460.68	2.62437	3.0326
837	0.00375678	33	3.543	1.613	18.548	0.806	4.31034	55.9384	93.1648	22.857	0	0	16.67	0	50	0	577.896	1381.3	2.67413	0.75815
838	0.00436254	28.4	3.543	2.419	13.71	2.419	1.33333	9.84669	80.2285	4.167	0	0	0	0	11.54	0	551.106	1333.96	2.69539	1.89538
839	0.0020293	24.6	3.333	4	4	0	1.42857	14.9437	73.917	5	0	0	0	0	25	0	473.627	1338.21	2.70189	0.379075
840	0.00267953	29.1	3.12	2.564	8.974	0	4.54545	129.483	93.3	0	0	0	16.67	0	0	0.23	466.928	1371.23	2.67431	0
841	0.00219678	118.8	20.077	1.149	2.299	0.766	4.16667	6.03552	50.0732	13.333	0	0	40	0	0	0	461.498	1437.63	2.61026	1.89538
842	0.00146105	31.5	3.538	4.348	15.217	0	5.66038	15.3738	88.9769	0	0	0	12.5	12.5	0	0	533.68	1496.48	2.54887	0.379075
843	0.00144487	20.8	3	3.333	10	0	7.31707	17.3743	69.2102	7.692	0	0	0	0	50	0	466.928	1504.46	2.52439	0
844	0.00172418	24.9	3.583	4.651	4.651	0	0	15.713	63.7984	40	10	0	0	0	40	0	508.28	1549.84	2.47265	0.379075
845	0.00141202	39.7	4	8.929	16.071	0	11.2676	14.3417	99.1488	3.704	0	0	0	0	42.86	0	537.21	1529.38	2.50491	0.75815
846	0.00190411	35.2	3.722	1.493	19.403	0	9.09091	13.3555	94.5326	0	0	0	0	0	40	0	551.106	1595.52	2.43404	0.379075
847	0.00289438	29	3.231	0	17.857	4.762	3.27869	12.0724	86.3743	5.263	0	0	0	0	12.5	0	642.93	1572.05	2.47631	0
848	0.0031568	23.1	3.318	4.11	12.329	1.37	8.33333	73.1286	63.3554	15.789	0	0	0	0	0	0	675.431	1555.93	2.54026	0.75815
849	0.00218521	25.2	3.667	0	7.273	0	3.48837	14.4387	68.6434	0	0	0	0	0	0	0	607.659	1557.14	2.49618	0.379075
850	0.00352723	27.2	3	9.375	14.583	2.083	4.21687	11.3058	87.8876	21.569	0	0	0	0	0	0	527.743	1286.84	2.69108	0.75815
851	0.00335405	24.7	3.458	1.205	10.843	1.205	7.40741	12.1411	71.5554	26.667	0	0	0	0	22.22	0	508.28	1239.96	2.70174	1.13723
852	0.00365972	22.4	3.417	2.439	15.854	0	2.63158	12.2105	65.5789	0	11.11	0	0	0	27.78	0.1	555.661	1222.56	2.7091	0
853	0.00247847	22.2	3.667	1.818	1.818	3.636	0	14.4387	60.5211	4	6.67	0	0	0	0	0.11	476.28	1226.16	2.71135	3.0326
854	0.00621778	28.5	3.471	3.39	11.864	0.565	1.36986	44.9562	82.0229	0	0	0	3.03	0	9.09	0	511.986	1160.69	2.74059	0.379075
855	0.00337737	21.6	3.174	5.479	6.849	0	0	12.8726	68.1003	0	0	0	0	0	25	0.11	582.241	1111.32	2.78389	3.0326
856	0.00246674	24.7	3.211	1.639	9.836	0	1.66667	13.876	72.9709	0	0	0	0	0	0	0	477.602	1101.07	2.82716	2.65353
857	0.00295268	16.3	3.2	0	18.75	0	12.1212	15.1557	44.0278	18.182	0	0	0	0	16.67	0	527.743	1081.44	2.83402	0
858	0.00755606	24.6	3.382	1.613	22.043	0	4.08163	43.5058	72.7893	2.857	0	0	0	0	0	0	404.761	1067.95	2.84937	1.5163
859	0.000362517	0	0	0	0	0	2.38095	0	0	6.667	0	0	0	0	0	0	427.475	1077.93	2.86032	0
860	0.000561971	33.8	3.167	0	21.053	0	0	19.0814	106.767	0	0	0	0	0	0	0	401.635	1111.89	2.81618	0
861	0.000554876	30.6	2.833	11.765	11.765	0	7.27273	19.4284	108.132	0	0	0	0	0	0	0	401.635	1111.89	2.80346	0
862	0.000414997	36.1	3	0	13.333	0	0	19.7884	120.483	0	0	0	0	0	0	0	427.475	1122.6	2.80529	0
863	0.000365986	0	0	0	0	0	3.0303	0	0	0	0	0	0	0	0	0	404.761	1156.34	2.78863	0
864	0.000526957	47.4	2.778	0	4	0	8.88889	18.1108	170.792	0	0	0	0	0	0	0	377.369	1145.94	2.80833	0
865	0.000478158	37.6	3.6	0	27.778	0	5.97015	19.2533	104.568	0	0	0	0	0	0	0	383.99	1190.17	2.77717	0.75815
866	0.000317763	53.5	3.4	0	17.647	0	10.5263	19.4284	157.35	0	0	0	0	0	0	0	383.99	1190.17	2.77717	0
867	0.000316139	44.3	2.333	0	14.286	0	15.3846	19.9734	189.79	0	0	0	0	0	0	0	413.996	1201.24	2.74997	0
868	0.000476005	42	2.857	5	15	0	0	18.9124	147.057	0	0	0	0	0	0	0	365.493	1224.1	2.75821	0.379075
869	0.00253001	48.2	3.389	3.279	14.754	0.82	4.3771	9.9383	142.292	2.151	0	0	0	0	30.77	0.17	181.014	1330.65	2.64099	4.16983
870	0.00126774	45.8	3.625	5.172	12.069	0	6.25	80.395	126.209	0	0	0	14.29	0	71.43	0	286.209	1351.79	2.62482	0
871	0.00102288	24.4	3.125	0	12	0	2.67857	18.1108	78.2103	0	0	0	0	0	40	0	356.769	1370.31	2.62215	0.379075
872	0.000974603	42.1	3.154	2.439	12.195	0	0	15.9476	123.127	0	0	0	0	0	40	0	362.029	1336.32	2.64891	0.75815
873	0.000731991	64.2	3.357	4.255	17.021	0	7.14286	15.264	191.259	0	0	0	0	0	0	0	370.629	1302.41	2.68115	1.5163
874	0.00036777	54.4	3.333	5	15	0	2.04082	18.9124	163.145	0	0	0	0	0	0	0	382.345	1268.59	2.7151	0.379075
875	0.00031829	0	0	0	0	0	10.5263	0	0	0	0	0	0	0	0	0	396.9	1234.86	2.72959	0
876	0.00049315	52.7	3.714	7.692	11.538	0	5.88235	17.9585	141.945	0	0	0	0	0	0	0	365.493	1224.1	2.75821	0
877	0.00122884	48	3.105	6.78	16.949	5.085	12.5	14.0586	113.928	0	0	0	0	0	33.33	0	336.781	1292.21	2.70575	0
878	0.00109429	58.5	3.368	1.563	15.625	0	4.91803	77.3218	173.629	0	0	0	0	0	40	0	336.781	1292.21	2.69301	2.27445
879	0.00116554	49.8	3.625	0	17.241	0	2.38095	14.1517	137.275	0	0	0	0	0	33.33	0	292.739	1317.33	2.66912	0
880	0.000814868	61.4	3.333	2	12	0	5.88235	84.8939	184.079	7.143	0	0	0	0	40	0.21	258.443	1309.17	2.6786	0.379075
881	0.00095604	64.9	3.875	4.839	19.355	0	2.77778	13.7864	167.357	13.333	0	0	0	0	80	0	270.359	1274.54	2.72366	0.75815
882	0.00104479	39.2	3.417	2.439	12.195	0	4.16667	15.9476	114.855	0	0	0	0	0	40	0	286.209	1239.96	2.76859	2.27445
883	0.00138455	48.4	3.35	1.493	17.91	0	7.89474	13.3555	144.451	0	0	0	0	0	28.57	0	191.173	1295.62	2.67695	0
884	0.00132455	58.1	3.667	2.597	19.481	0	3.22581	12.5697	150.995	0	0	0	0	0	28.57	0	206.998	1260.62	2.7175	2.65353
885	0.00145594	33	3.429	4.167	10.417	0	7.69231	15.1557	96.1581	0	0	0	0	0	28.57	0	227.31	1225.64	2.7541	2.65353
886	0.00161857	48.8	3.435	2.532	12.658	2.532	5.26316	12.4235	142.101	0	0	0	0	0	0	0	251.022	1190.7	2.7832	1.13723
887	0.000893446	31.3	3.111	0	17.857	3.571	7.69231	17.6616	100.734	0	0	0	0	0	0	0	277.263	1155.79	2.8044	1.5163
888	0.00191738	28.7	3.056	3.636	20	0	0	14.4387	83.4471	0	0	0	0	0	0	0	255.993	1149.78	2.79037	1.5163
889	0.000863961	40.5	3.5	8.571	17.143	0	0	16.6954	115.746	0	0	0	0	0	0	0	224.521	1140.98	2.75847	0
890	0.00185063	29.2	3.6	1.852	9.259	0	0	14.5369	81.0534	0	0	0	0	0	0	0	286.209	1114.72	2.80524	0.379075
891	0.00173677	81.8	3.156	2.817	16.901	0	0	51.653	259.102	0	0	0	0	0	0	0	70.9997	1353.19	2.57038	0.379075
892	0.00123051	0	0	0	0	0	5.55556	0	0	0	0	0	0	0	33.33	0	146.37	1395.83	2.54497	0
893	0.000719885	150	3.724	3.704	22.222	0.926	4.16667	10.6307	402.842	0	0	0	0	0	0	0	79.3801	1388.58	2.53008	1.13723
894	0.00127611	101.9	3.714	1.538	11.538	0	0	9.58171	274.27	0	0	0	0	0	0	0	100.409	1423.98	2.50106	0
895	0.00128462	0	0	0	0	0	10.8696	0	0	0	0	0	0	0	28.57	0	158.76	1431.04	2.50115	0
896	0.0012817	0	0	0	0	0	3.7037	0	0	3.125	0	0	0	0	50	0	177.499	1466.28	2.46943	0
897	0.000710535	108.4	3.208	3.896	11.688	3.896	3.33333	12.5697	337.774	0	0	0	0	0	0	0	100.409	1423.98	2.48858	1.13723
898	0.000200536	0	0	0	0	0	5.61798	0	0	0	0	0	0	0	0	0	79.3801	1421.77	2.47887	0
899	0.00126958	100	3.342	3.15	18.11	0	1.85185	9.71239	291.435	0	0	0	0	0	0	0	112.26	1457.22	2.44009	1.13723
900	0.00125272	19.2	4	0	20.833	0	4	18.2656	47.896	0	0	0	0	0	28.57	0	177.499	1466.28	2.45679	0
901	0.00133287	23.3	3.875	0	9.677	3.226	0	17.2342	60.0209	0	0	0	0	0	0	0	200.817	1501.52	2.44667	0.75815
902	0.00133572	86.8	3.625	2.586	17.241	0	0.892857	10.2237	239.57	0	0	0	0	0	0	0	146.37	1492.68	2.41464	1.13723
903	0.00133255	85.6	3.353	1.754	12.281	0	9.09091	10.3225	255.15	0	0	0	0	0	0	0	181.014	1528.14	2.41331	0
904	0.00133542	0	0	0	0	0	0	0	0	10	0	0	0	0	0	0	227.31	1536.78	2.44921	0
905	0.00132955	12	2.667	25	0	0	0	19.6067	45.128	0	0	0	0	0	0	0	255.993	1572.05	2.43756	0
906	0.00132699	76.1	3.607	3.96	16.832	0.99	7.5	62.5717	211.004	0	0	0	0	0	0	0	181.014	1528.14	2.40079	0
907	0.00490541	62.2	3.211	3.279	19.672	0.984	6.81818	5.36821	193.664	0	23.08	0	0	0	23.08	0	270.359	1603.79	2.41192	0.379075
908	0.0013224	0	0	0	0	0	0	0	0	2.222	0	0	0	0	28.57	0	146.37	1395.83	2.55759	0
909	0.00834195	42.1	3.375	4.274	15.67	0.57	6.66667	4.81199	123.472	0	0	0	17.86	0	0	0.15	70.9997	1420.44	2.48421	3.79075
910	0.00313119	30	3.133	4.255	17.021	0	0	11.4267	95.8101	0	11.11	0	0	0	0	0	79.3801	1384.95	2.49083	0
911	0.000484847	111.4	3.857	1.852	20.37	0	6.25	14.5369	288.751	0	0	0	50	0	0	0	79.3801	1313.97	2.53873	1.13723
912	0.000550908	0	0	0	0	0	0	0	0	0	0	0	0	0	0	0	79.3801	1313.97	2.55084	0
913	0.00155736	53.9	3.5	2.381	17.857	0	5.37634	12.0724	154.107	0	0	0	0	0	28.57	0	158.76	1282.42	2.53338	3.41168
914	0.00154681	52.4	3.375	6.173	8.642	0	1.63934	12.2806	155.158	0	0	0	0	0	25	0	146.37	1317.8	2.50226	0
915	0.00148315	37.8	4	1.786	14.286	0	8.33333	14.3417	94.3935	0	0	0	0	0	28.57	0	141.999	1353.19	2.48132	0
916	0.00720629	61.6	3.364	1.802	18.694	0.901	4.16667	22.602	180.398	0	3.57	0	3.57	0	0	0	181.014	1391.76	2.47028	0.379075
917	0.000213911	0	0	0	0	0	0	0	0	0	0	0	0	0	0	0	283.999	1371.69	2.55697	0
918	0.000947521	58	3.667	0	10.909	0	0	14.4387	137.2	0	0	0	0	0	0	0	212.999	1360.62	2.51958	0.75815
919	0.00152761	63.5	3.593	6.186	14.433	3.093	2.85714	11.2463	176.747	5	0	0	0	0	25	0	215.937	1325.43	2.54181	0.75815
920	0.00153911	42.2	3.095	1.538	18.462	1.538	5.7971	13.5246	136.443	0	0	0	0	0	0	0	224.521	1290.26	2.5561	0.379075
921	0.00169239	39	3.474	0	9.091	1.515	3.44828	13.4395	112.267	0	0	0	0	0	0	0	238.14	1255.11	2.57951	0
922	0.00165692	39.8	3.474	3.03	12.121	0	3.84615	13.4395	114.67	0	0	0	0	0	37.5	0	255.993	1219.98	2.6007	0
923	0.000798644	40.1	2.909	6.25	3.125	0	3.38983	17.0962	137.733	0	0	0	0	0	0	0	227.31	1215.32	2.59268	0
924	0.00124027	33.9	4.2	0	11.905	0	6.45161	15.8295	80.6279	0	14.29	0	0	0	0	0	206.998	1173.64	2.63033	0.379075
925	0.00164649	31	3	5.882	3.922	0	6.06061	14.8398	103.25	0	0	0	0	0	0	0	177.499	1209.08	2.6167	0
926	0.00172276	48.2	3.609	2.41	10.843	1.205	6.0241	12.1411	127.702	0	0	0	0	0	37.5	0	150.613	1244.52	2.5893	0
927	0.00169552	40.7	3.45	4.348	8.696	0	4.16667	13.1906	117.958	0	0	0	0	0	0	0	127.997	1279.97	2.55978	2.27445
928	0.00625175	34.7	4.617	3.687	5.991	1.382	8.92857	39.1547	73.5794	3.03	0	0	0	0	22.22	0	146.37	1206.99	2.66924	1.13723
929	0.0073006	26	3.065	3.684	15.263	1.053	2.77778	7.54995	84.9245	0	0	0	0	4.76	0	0.32	141.999	1207.52	2.76628	2.65353
930	0.00157436	20.3	3.556	3.125	18.75	0	3.27869	17.0962	57.166	0	0	0	0	0	0	0	100.409	1282.42	2.64568	0
931	0.00315168	37.4	3.576	4.237	10.169	0	10.8108	10.1267	104.706	0	0	0	0	0	20	0	127.997	1247.05	2.67954	3.0326
932	0.00329134	33.7	3.7	1.802	10.811	0.901	0	10.4743	91.1484	0	0	0	0	0	0	0	158.76	1211.68	2.70995	0.379075
933	0.00125979	47.6	4	1.667	16.667	0	0	13.9667	119.067	0	0	0	0	0	42.86	0	191.173	1176.33	2.73634	0
934	0.0175402	23.4	2.908	3.415	17.317	2.439	0	44.0122	78.1064	0	0	0	0	7.14	100	0.15	427.475	1370.31	2.64434	4.16983
935	0.00902787	39.7	3.476	2.793	19.274	0.838	17.3333	4.7373	114.091	0	0	0	3.33	0	0	0	427.475	1482.52	2.55403	1.13723
936	0.00967962	0	0	0	0	0	1.89274	0	0	0.971	0	0	0	0	100	0	321.465	1343.85	2.77962	0
937	0.00190654	27.8	3.533	9.434	9.434	0	0	83.149	78.6767	0	0	0	0	0	0	0	305.381	1055.49	2.76938	0.379075
938	0.000872535	16	3.5	0	7.143	0	0	19.9734	45.8435	0	0	0	0	0	25	0	286.209	1022.12	2.87172	0
939	0.000772871	23.3	2.571	5.556	16.667	16.667	7.69231	19.2533	90.5714	12.5	0	0	0	0	0	0	365.493	1081.44	2.78999	0
940	0.00219075	52	3.257	4.386	13.158	1.754	0	10.3225	159.763	10.526	0	0	0	0	30.77	0	473.627	1313.49	2.70764	2.27445
941	0.00198629	14.6	3.625	3.448	20.69	3.448	0	17.5168	40.2762	0	0	0	0	0	20	0	508.28	1325.43	2.72174	1.13723
942	0.00202951	21.2	3.583	0	18.605	0	5.60748	15.713	59.1276	2.857	0	0	0	0	33.33	0	449.042	1268.59	2.7091	0
943	0.00212173	28.3	3.75	1.667	6.667	0	10.5263	13.9667	70.6971	0	0	0	0	0	33.33	0	477.602	1246.55	2.73297	0
944	0.00210256	22.4	3.615	0	8.511	0	3.125	15.264	61.8294	0	0	0	0	0	33.33	0	551.106	1305.31	2.73993	0
945	0.000972058	19.5	4.75	10.526	15.789	10.526	6.25	19.0814	41.1498	50	0	0	0	0	33.33	0	527.743	1272.56	2.74434	0
946	0.000958723	29.2	3.111	7.143	3.571	7.143	3.0303	17.6616	93.8749	0	0	0	0	0	33.33	0	451.839	1213.24	2.7408	3.79075
947	0.00245564	23.2	3	1.754	17.544	1.754	6.30631	14.2461	77.3728	0	14.29	0	0	0	14.29	0.16	504.548	1239.96	2.74781	0
948	0.000691542	36.2	3.571	0	16	0	5.12821	18.1108	101.223	8.333	0	0	0	0	0	0	377.369	1134.33	2.73665	0
949	0.000714162	21	3	20	0	0	13.3333	19.7884	70.0121	25	0	0	0	0	0	0	377.369	1156.34	2.71242	0
950	0.00132726	23.4	3.1	0	22.581	0	0	17.2342	75.343	0	0	0	0	0	0	0	404.761	1190.17	2.72076	0
951	0.00135865	30.2	3.727	0	17.073	0	4.65116	15.9476	80.9626	0	0	0	0	0	37.5	0	428.946	1224.1	2.70895	0.379075
952	0.000663787	27.1	4.5	0	16.667	5.556	0	109.377	60.2603	10	0	0	0	0	0	0	382.345	1248.57	2.67837	0.379075
953	0.00100267	25.9	3.25	0	7.692	7.692	3.40909	102.021	79.7867	0	0	0	0	0	66.67	0	349.633	1239.96	2.66465	0
954	0.00181749	26.4	3.2	2.083	12.5	2.083	5.55556	86.0984	82.5313	0	0	0	10	0	80	0	365.493	1205.43	2.67867	0
955	0.00181395	22.1	2.857	7.5	7.5	0	8	16.0676	77.1797	0	0	0	0	0	40	0	365.493	1170.96	2.68582	0
956	0.000810153	25.9	3	4.762	14.286	0	0	18.7465	86.4035	0	0	0	0	0	40	0	354.998	1145.94	2.71881	0.75815
957	0.00119567	19.2	3.833	0	21.739	0	5	18.4232	50.1809	7.143	0	0	0	0	75	0	327.292	1111.89	2.71991	0
958	0.00185474	14.6	3.857	0	3.704	0	0	17.8088	37.7412	0	0	0	0	0	40	0	327.292	1088.98	2.74463	0
959	0.00135624	20.6	4	7.143	3.571	0	3.7037	17.6616	51.6131	12.5	0	0	0	0	0	0.16	377.369	1134.33	2.75924	3.41168
960	0.00133127	30	3.333	12.5	10	0	11.7647	91.2789	90.1395	27.907	0	0	0	0	0	0	365.493	1081.44	2.77593	0.75815
961	0.00715827	25.1	3	2.778	18.333	0	9.21053	81.0977	81.0252	8.333	2.86	0	0	0	8.57	0	555.661	1211.68	2.75569	0.379075
962	0.00191319	34	3.421	7.692	15.385	0	9.67742	13.5246	99.3108	10	0	0	11.11	0	0	0	449.042	1339.62	2.72487	1.13723
963	0.00199592	23.5	3.133	8.511	4.255	0	5	15.264	70.1433	0	0	0	0	0	0	0	494.456	1290.75	2.72515	1.5163
964	0.00237186	37.1	3.034	1.136	10.227	0	1.44928	11.8056	122.267	5.263	0	0	8.33	0	0	0	555.661	1224.1	2.71869	0
965	0.00237533	35.4	3.5	3.571	11.905	1.19	0	12.0724	101.039	8.333	0	0	0	0	0	0	493.18	1190.7	2.74835	0.75815
966	0.0023335	26.6	3.1	3.226	4.839	9.677	20.3704	13.7864	85.708	0	0	0	8.33	0	33.33	0	444.812	1143.18	2.75524	1.5163
967	0.00235302	23.8	2.8	10.714	7.143	0	8.69565	14.3417	84.9973	6.25	0	0	8.33	0	33.33	0	433.331	1160.69	2.74504	0.75815
968	0.00235977	32.2	3.167	2.632	15.789	2.632	20.8333	12.6441	101.705	0	0	0	0	0	0	0	511.986	1222.56	2.74631	0
969	0.00236398	30.9	3.65	4.11	10.959	0	3.38983	12.8726	80.3729	0	0	0	0	0	0	0	551.106	1286.35	2.71993	0.75815
970	0.00201763	34.2	3.45	7.246	15.942	2.899	5.88235	13.1906	99.1263	10	0	0	0	0	0	0	516.886	1303.38	2.69253	0.75815
971	0.00200894	20.4	3.417	12.195	7.317	0	0	15.9476	59.7331	0	0	0	0	0	0	0	439.109	1369.85	2.70838	0
972	0.000853653	35.1	3.75	0	10	0	0	17.3743	93.7149	0	0	0	0	0	0	0	396.9	1418.66	2.67915	0
973	0.00120582	0	0	0	0	0	5.12821	0	0	0	0	0	0	0	0	0	362.029	1437.63	2.68832	0
974	0.0010087	41.6	3.5	11.905	4.762	0	9.78261	15.8295	118.965	2.941	0	0	0	0	0	0	431.874	1400.33	2.67609	1.5163
975	0.00235277	37.8	3.069	7.865	14.607	0	10	11.7407	123.259	0	0	0	33.33	0	0	0	543.043	1317.8	2.71479	0.379075
976	0.000667206	48	3.556	0	37.5	0	15.3846	17.0962	134.891	0	0	0	0	0	50	0	554.525	1286.84	2.73214	0
977	0.000311466	44.9	2.8	0	21.429	0	4.7619	19.9734	160.531	0	0	0	0	0	0	0	516.886	1349.46	2.71648	0
978	0.000319526	0	0	0	0	0	5.45455	0	0	7.692	0	0	0	0	0	0	516.886	1349.46	2.69847	0
979	0.00215214	29.3	3.316	1.587	15.873	0	0	13.698	83.6378	0	15.38	0	0	0	0	0	473.627	1397.18	2.66918	0.379075
980	0.00244479	17.6	3.583	2.326	6.977	0	9.52381	15.713	49.0839	0	13.33	0	0	0	26.67	0	508.28	1351.79	2.73561	0
981	0.0259107	5.3	3.067	1.449	18.116	0	1.26582	139.143	17.3674	4.545	0	0	0	0	0	0.29	286.209	1109.62	3.06523	0
982	0.011079	23.9	2.819	3.396	16.226	0	4.08163	5.96808	83.0399	0	0	0	0	0	0	0.43	200.817	990.185	2.9875	0.379075
983	0.0104993	0	0	0	0	0	0	0	0	0	0	0	0	0	0	0	112.26	933.855	2.89464	0
984	0.0030069	47.6	3.326	1.399	19.58	0	7.27273	51.4341	139.679	0	0	0	0	0	31.25	0.12	79.3801	852.736	2.94931	1.13723
985	0.00121333	26.4	2.909	6.25	9.375	0	6	17.0962	90.6596	11.111	0	0	0	0	14.29	0.19	127.997	923.678	2.93097	0
986	0.00134145	49.2	3.474	1.515	22.727	4.545	0	13.4395	141.638	0	0	0	0	0	25	0	127.997	923.678	2.87922	1.13723
987	0.0014101	46.8	3.474	6.061	13.636	4.545	0	13.4395	134.742	0	0	0	0	0	25	0	158.76	959.153	2.83859	0.379075
988	0.00122404	42.5	3.059	5.769	19.231	5.769	3.2	14.7375	130.714	0	0	0	0	0	28.57	0	206.998	925.723	2.84433	4.5489
989	0.00115864	40.6	3.133	4.255	2.128	2.128	6.89655	15.264	129.462	16	0	0	0	0	28.57	0	158.76	888.206	2.8878	0.379075
990	0.00119977	28.3	3.091	0	11.765	0	5.66038	16.8269	91.6845	2.941	0	0	0	0	20	0	158.76	888.206	2.88183	0
991	0.00810336	39.7	3.354	1.553	13.043	1.242	7.69231	5.14828	114.767	0	6.25	0	0	0	0	0.17	303.311	1074.42	2.79163	4.92798
992	0.00482319	42.9	3.185	2.415	16.908	0	5	73.7979	134.766	0	16.67	0	0	0	11.11	0.22	301.226	1034.99	2.81824	1.89538
993	0.00133605	44.2	3.278	6.78	6.78	0	11.3636	14.0586	134.725	0	0	0	0	0	0	0	305.381	1004.09	2.84602	3.79075
994	0.00113451	42.3	3.2	2.083	16.667	0	3.0303	15.1557	132.216	0	0	0	0	0	0	0	255.993	1030.11	2.77373	1.5163
995	0.00112033	42	2.938	6.383	17.021	0	6.06061	15.264	133.889	0	0	0	0	0	0	0	227.31	994.629	2.78526	0.75815
996	0.00130182	37.6	3.5	6.122	20.408	0	13.2075	15.0489	107.542	5	0	0	0	0	0	0	286.209	968.957	2.85905	2.27445
997	0.00140481	39.2	3.929	5.455	7.273	3.636	3.50877	14.4387	99.6579	0	0	0	0	0	0	0	238.14	929.12	2.86706	0
998	0.00120429	39	3.357	4.255	19.149	2.128	4.65116	15.264	107.947	0	0	0	0	0	0	0	200.817	959.153	2.80807	1.89538
999	0.00371459	13.5	3.333	6	14	2	0	154.844	40.3813	0	10	0	0	0	0	0.42	238.14	1029.5	2.79393	0.379075
1000	0.001405	44.8	3.5	6.349	9.524	0	0	13.698	128.114	0	0	0	0	0	25	0	258.443	898.784	2.89654	0.379075
1001	0.00131398	46.4	3.211	0	11.475	0	0	13.876	144.599	0	30	0	0	0	30	0	215.937	858.627	2.89421	0
1002	0.0103913	20.6	3.014	2.804	14.486	0	1.96078	6.95965	67.3642	7.692	0	0	4.35	0	34.78	0.1	370.629	955.863	3.2107	1.13723
1003	0.00258638	25.9	3.722	2.985	7.463	0	6.89655	75.8716	69.5954	0	6.25	0	0	0	12.5	0	502.044	969.607	2.91924	0
1004	0.00208163	29.8	3.263	3.226	9.677	0	3.52941	13.7864	91.2747	0	7.69	0	0	0	0	0	427.475	909.932	2.94178	0
1005	0.00225332	20.4	3.286	4.348	8.696	0	1.78571	15.3738	62.1306	0	7.69	0	0	0	38.46	0.13	498.264	937.223	2.92615	1.5163
1006	0.00393855	30	3.471	5.932	14.407	1.695	0	10.1267	86.3261	0	7.69	0	0	0	38.46	0	425.998	876.782	2.95659	8.71873
1007	0.000980706	31.6	3.1	6.452	22.581	0	5.26316	17.2342	101.967	0	0	0	0	0	0	0	431.874	811.076	2.9464	0
1008	0.00134654	29.7	3.333	2.5	10	2.5	6.81818	16.0676	81.6911	0	0	0	0	0	50	0	392.109	831.03	2.95372	2.65353
1009	0.00146411	32.1	3.133	0	21.277	0	8.33333	15.264	102.451	0	0	0	0	0	25	0	321.465	878.218	2.93459	0
1010	0.0014049	45.6	3.765	1.563	15.625	4.688	0	13.6107	121.005	0	0	0	0	0	25	0	319.499	843.822	2.94123	0.75815
1011	0.00134377	40.2	3.6	1.852	24.074	0	14	14.5369	104.184	6.25	0	0	0	0	28.57	0	319.499	843.822	2.94928	0
1012	0.000924717	34.6	3.556	3.125	12.5	3.125	0	17.0962	97.3271	0	0	0	0	0	0	0	215.937	858.627	2.89421	0
1013	0.000190083	78.9	3.75	0	0	0	0	19.7884	210.435	0	0	0	0	0	20	0	181.014	854.95	2.89614	0
1014	0.00321171	43	3.136	2.899	18.116	2.174	5.7377	52.5476	136.999	2.19	0	0	0	0	23.53	0	251.022	793.801	2.94809	0.379075
1015	0.00102656	26.3	3.375	7.407	7.407	7.407	3.33333	17.8088	77.9305	0	0	0	0	0	66.67	0	396.9	797.76	2.94916	3.41168
1016	0.00287545	32	3.538	2.174	18.478	1.087	6.81818	11.5503	83.4651	0	5	0	0	0	45	0.27	336.781	741.259	3.0065	1.89538
1017	0.00327161	9.2	3.75	0	10	0	7.57576	98.7024	24.4528	0	0	27.27	0	27.27	45.45	0.35	317.52	697.461	3.06035	0
1018	0.0013299	62.4	3.458	1.205	19.277	0	5.17241	12.1411	180.465	44.444	0	0	0	0	100	0	292.739	766.336	2.98085	0
1019	0.0149234	0	0	0	0	0	0	0	0	0	0	0	100	0	100	0	191.173	748.87	3.46092	0
1020	0.000946019	23.3	3.143	4.545	9.091	0	6	18.5834	73.9943	0	0	0	0	0	66.67	0	106.5	816.496	2.96526	0
1021	0.0026493	13.2	3.889	0	5.714	0	2.38095	94.8456	33.9712	0	0	0	0	0	0	0	79.3801	781.803	3.02505	0
1022	0.000470617	0	0	0	0	0	0	0	0	0	0	0	0	0	0	0	35.4998	858.627	3.13845	0
1023	0.03195	0	0	0	0	0	3.57143	0	0	24.138	8.33	12.5	0	8.33	0	0.54	404.761	79.3801	4.2936	0
1024	0.00109533	23.7	2.889	3.846	11.538	15.385	11.4286	17.9585	82.1667	0	0	0	0	0	0	0	413.996	227.31	3.20876	0
1025	0.00165236	28.4	3.133	4.255	8.511	0	5.45455	15.264	90.7794	5	0	0	0	0	0	0	349.633	255.993	3.24149	0.379075
1026	0.00128117	32.8	3	7.143	14.286	4.762	10.8108	15.8295	101.469	0	0	0	0	0	0	0	396.9	251.022	3.21656	1.5163
1027	0.00135153	25.2	3.778	2.941	14.706	5.882	5.26316	16.8269	66.5913	0	0	0	0	0	0	0	382.345	277.263	3.2254	0
1028	0.00165598	23.6	3	7.692	7.692	0	5.60748	16.1893	72.4648	3.03	0	0	0	0	0	0	336.781	286.209	3.24351	1.5163
1029	0.00402115	28.8	3.515	3.448	11.207	0	7.27273	58.08	82.066	0	0	0	0	0	30.43	0	362.029	334.905	3.2182	1.13723
1030	0.00175501	21.7	3.167	2.632	5.263	0	4	92.6729	68.3758	0	0	0	0	0	70	0.15	356.769	365.493	3.20817	0
1031	0.00181056	21.5	3.25	2.564	7.692	0	3.93701	16.1893	66.278	0	0	0	0	0	0	0	392.109	444.812	3.1517	2.27445
1032	0.0015375	37.7	3.222	5.172	10.345	0	8.06452	80.395	117.073	12.5	0	0	0	0	100	0	427.475	404.761	3.20027	0.379075
1033	0.00138299	21	2.636	3.448	10.345	0	0	17.5168	79.5379	18.182	0	0	0	0	50	0	425.998	433.331	3.18689	1.13723
1034	0.00188817	85.8	3.447	4.321	9.877	0	8.92857	8.3791	238.326	0	27.27	45.45	0	36.36	100	0	496.998	477.602	3.22817	3.79075
1035	0.00177131	38.4	2.833	5.882	13.235	2.941	10.5263	13.2725	135.493	4.167	8.33	33.33	0	33.33	75	0	498.264	451.839	3.25094	1.13723
1036	0.00194201	42.2	3.417	1.22	19.512	0	16.6667	12.2105	123.583	7.143	0	18.18	9.09	27.27	100	0	466.928	401.635	3.22965	0
1037	0.00133733	32.9	3.143	6.818	11.364	0	3.9604	15.5983	104.686	0	73.33	6.67	13.33	26.67	0	0.11	466.928	401.635	3.22965	0
1038	9.79201e-05	0	0	0	0	0	7.04225	0	0	17.391	100	100	0	100	0	0	508.28	404.761	3.25167	0
1039	0.00190629	47.2	3.333	2.222	23.333	0	8.88889	11.6765	125.899	0	40	6.67	0	13.33	50	0	449.042	327.292	3.20398	0
1040	0.000802764	54.8	2.933	0	13.636	2.273	4.12371	15.5983	186.855	6.25	66.67	0	0	0	50	0	449.042	327.292	3.19954	2.65353
1041	0.00168552	37.4	2.864	9.524	15.873	0	3.7037	13.698	118.658	0	38.46	15.38	7.69	15.38	69.23	0	428.946	277.263	3.20445	1.13723
1042	0.00574564	9.2	3.313	1.887	13.208	0	12.3457	151.662	27.8472	10.714	43.75	43.75	3.13	34.38	0	0.46	508.28	317.52	3.23855	0.75815
1043	0.00649366	16.9	27.5	0	0.909	0	0	109.068	4.61989	0	30.77	30.77	0	30.77	0	0.7	537.21	454.62	3.31785	0
1044	0.000140043	0	0	0	0	0	2.32558	0	0	0	0	0	0	0	0	0	603.497	554.525	3.27108	0
1045	0.00696474	32.7	2.961	6.579	17.105	0	7.69231	6.65607	103.378	0	20	40	2.86	40	17.14	0.25	283.999	191.173	3.29771	0
1046	0.00171201	34.5	2.81	1.695	6.78	0	7.04225	79.8659	116.822	9.091	20	10	0	10	40	0.19	327.292	112.26	3.24345	1.5163
1047	0.0173638	6.5	2.974	3.54	19.469	0	8.43373	58.926	20.7327	0	21.05	0	10.53	0	0	0.25	270.359	127.997	3.35321	0.75815
1048	0.00429678	23.5	2.971	10.891	14.851	0	0	11.0143	76.8017	0	25	54.17	0	50	70.83	0	215.937	255.993	3.27822	2.27445
1049	0.00200458	30.4	3.389	4.918	11.475	0	3.44828	13.876	89.7943	9.091	0	0	0	0	18.18	0	127.997	351.431	3.20228	0.379075
1050	0.00178358	29.7	3.313	7.547	11.321	1.887	19.4444	14.6365	84.1007	0	0	0	0	0	40	0.14	79.3801	354.998	3.18691	0
1051	0.00166303	17.4	3.625	0	0	0	5.88235	17.5168	48.1049	8.333	0	0	0	0	50	0	79.3801	404.761	3.1479	0
1052	0.00220727	25.4	3.733	0	12.5	0	0	14.3417	58.8962	0	0	0	16.67	0	100	0	50.2044	383.99	3.15944	0
1053	0.00986055	15.6	3.348	3.896	10.39	0	5.26316	8.65054	44.6223	0	3.85	0	0	0	7.69	0.12	127.997	270.359	3.33066	1.13723
1054	0.0012973	37.8	3.063	12.245	8.163	0	11.1111	15.0489	123.333	0	0	0	0	0	0	0	112.26	327.292	3.17026	1.5163
1055	0.000960786	51	3.267	2.041	12.245	2.041	12.5	15.0489	156.122	6.667	0	0	0	0	0	0	146.37	321.465	3.1779	0
1056	0.00233202	26.6	2.952	3.226	17.742	6.452	3.94737	13.7864	85.7626	3.448	0	0	0	0	16.67	0	248.499	362.029	3.19496	0.75815
1057	0.00227313	37	2.897	5.952	16.667	0	13.1579	12.0724	127.577	0	0	0	0	0	100	0	251.022	327.292	3.22424	0.379075
1058	0.0139236	0	0	0	0	0	4.82759	0	0	4.545	0	0	0	0	100	0	238.14	251.022	3.25319	0
1059	0.00227748	32.1	3.476	4.11	13.699	0	3.68421	12.8726	83.4255	1.538	0	0	0	0	50	0.14	251.022	177.499	3.23	1.5163
1060	0.00231324	31.6	3.318	2.74	12.329	0	4	73.1286	90.7818	0	0	0	0	0	16.67	0.15	277.263	141.999	3.22521	0.75815
1061	0.000158861	0	0	0	0	0	0	0	0	6.667	0	0	0	0	0	0	79.3801	336.781	3.16471	0
1062	0.00137979	36.2	3.333	2	10	0	4.54545	14.9437	108.712	7.143	25	0	0	0	0	0	303.311	473.627	3.16187	2.27445
1063	0.0088822	31.9	3.11	6.714	13.781	2.473	15	58.8797	99.0746	0	7.69	28.21	12.82	33.33	64.1	0.19	404.761	508.28	3.14638	7.20243
1064	0.00327162	13.8	3.214	4.444	6.667	6.667	11.7647	160.456	39.7356	0	0	23.08	7.69	23.08	30.77	0.27	466.928	511.986	3.16225	0.379075
1065	0.00715565	0	0	0	0	0	0	0	0	0	0	0	0	0	100	0	305.381	537.21	3.4691	0
1066	0.00333844	0	0	0	0	0	3.0303	0	0	5.263	0	0	0	0	0	0	270.359	567.998	3.1337	0
1067	0.00148865	14.8	2.75	9.091	13.636	0	3.92157	18.5834	53.74	0	0	0	33.33	0	100	0	35.4998	413.996	3.13041	0.379075
1068	0.00116143	16.4	3.167	0	0	0	13.6986	19.0814	51.6604	0	0	0	0	0	100	0	50.2044	415.515	3.15415	1.89538
1069	0.00153724	22.8	3.182	8.571	8.571	0	17.0732	16.6954	71.5568	0	0	0	0	0	50	0	70.9997	461.498	3.1567	0.379075
1070	0.00145264	39.2	3.167	0	12.281	0	10.3448	14.2461	123.912	0	0	0	12.5	0	25	0	70.9997	461.498	3.16509	0
1071	0.00145218	33.1	3.2	2.083	8.333	0	6.52174	15.1557	103.293	0	0	0	0	0	25	0	112.26	482.85	3.17284	0
1072	0.000928797	23.7	3.667	0	13.636	0	6.97674	18.5834	64.5997	0	0	0	0	0	40	0	146.37	540.718	3.14717	0.379075
1073	0.00186699	33.2	3.875	6.452	3.226	3.226	11.9048	13.7864	74.987	0	0	0	10	0	40	0	177.499	561.302	3.16272	0.379075
1074	0.00265562	29.7	3.591	5.063	20.253	0	15.7303	12.4235	79.0777	37.5	0	0	0	0	50	0.2	215.937	585.478	3.16316	0.75815
1075	0.00303731	26	3.591	0	15.19	0	7.40741	12.4235	72.4325	5.263	0	0	0	0	100	0	158.76	508.28	3.17541	0
1076	0.00229253	28.8	3.882	10.606	12.121	0	2.40964	13.4395	74.1539	0	0	0	0	0	18.18	0	227.31	496.998	3.13902	0.75815
1077	0.00189539	16.9	2.667	6.25	12.5	0	3.22581	17.0962	63.3116	15.385	0	0	0	0	40	0	150.613	466.928	3.16295	0.75815
1078	0.00211322	16.6	2.917	5.714	8.571	0	7.93651	16.6954	56.7853	0	0	0	0	0	0	0	206.998	461.498	3.13999	2.65353
1079	0.0021465	23.8	3	5.882	17.647	0	9.52381	14.8398	74.5398	5.882	0	0	0	0	0	0	158.76	427.475	3.14956	3.0326
1080	0.00457851	24	3.235	2.727	15.455	1.818	10.5263	10.5259	74.26	10	0	0	0	0	23.08	0.12	112.26	396.9	3.16451	1.13723
1081	0.00230309	34.3	3.16	7.595	13.924	0	5.12821	12.4235	104.208	0	0	0	0	0	66.67	0	248.499	362.029	3.20356	9.47688
1082	0.00173614	27.6	3	4.167	14.583	0	4.7619	15.1557	92.1587	7.692	0	0	0	0	0	0	258.443	431.874	3.14967	0.75815
1083	0.00193567	17.6	2.615	0	17.647	0	8.59375	16.8269	67.1602	6.818	11.11	0	0	0	0	0	321.465	415.515	3.16027	2.27445
1084	0.00786849	36.5	3.417	2.439	18.118	0	2.29885	5.62252	106.755	0	0	0	0	0	0	0	255.993	632.057	3.04166	2.27445
1085	0.0017432	31	4.154	1.852	12.963	0	4.70588	14.5369	74.5754	2.381	0	0	33.33	0	0	0	112.26	482.85	3.11263	1.5163
1086	0.00149491	23.4	3.5	5.714	14.286	2.857	5.88235	16.6954	66.8935	9.524	0	0	0	0	50	0	100.409	493.18	3.13479	0.75815
1087	0.00119336	41.1	4.455	4.082	14.286	0	4.54545	15.0489	92.1769	0	0	0	0	0	0	0	150.613	541.882	3.11729	1.13723
1088	0.00145483	21.3	3.1	3.226	12.903	0	9.52381	17.2342	68.7365	0	0	0	0	0	0	0	127.997	524.149	3.13544	0
1089	0.000666747	60	3.333	0	10	0	0	16.0676	179.978	0	0	0	0	0	0	0	200.817	590.835	3.08693	0
1090	0.00173787	28.8	3.333	4	18	2	8.16327	14.9437	86.3124	0	0	0	0	11.11	22.22	0	255.993	632.057	3.0339	1.5163
1091	0.00219892	40.5	3.423	8.989	13.483	1.124	16	11.7407	118.24	8.333	0	0	8.33	0	0	0	277.263	660.335	3.02039	1.13723
1092	0.00151532	21.8	3	0	21.212	6.061	4.54545	16.9605	72.5919	6.667	0	0	0	0	0	0	238.14	635.041	3.08285	0.379075
1093	4.483e-05	0	0	0	0	0	4.54545	0	0	0	100	0	0	0	0	0	255.993	651.691	3.08285	0
1094	0.00141051	47.5	3.35	4.478	11.94	0	2.73973	13.3555	141.793	0	0	0	0	0	0	0	206.998	603.497	3.10028	2.65353
1095	0.00161541	26.6	3.308	9.302	11.628	0	5.71429	15.713	80.4747	13.636	11.11	0	0	0	33.33	0	224.521	619.978	3.11211	2.65353
1096	0.00669433	13.7	3.172	1.087	9.783	0	3.8961	11.5503	43.3202	0	0	0	50	0	0	0.29	305.381	700.166	3.02627	0
1097	0.00169984	39.4	2.68	4.478	16.418	4.478	0	13.3555	147.073	4.545	68.42	10.53	0	15.79	57.89	0.21	277.263	714.421	3.03309	1.89538
1098	0.00200059	31	3.263	1.613	25.806	0	5	13.7864	94.9718	0	86.96	30.43	0	26.09	26.09	0.09	286.209	762.214	3.02588	0.75815
1099	0.00118703	37.1	2.75	4.545	11.364	2.273	4.0404	15.5983	134.79	2.778	100	23.53	0	29.41	0	0	317.52	779.381	3.02975	2.27445
1100	0.00202804	36	3.476	6.849	15.068	4.11	14.5695	12.8726	103.549	15.556	88	48	0	64	96	0	349.633	797.76	3.03581	0.75815
1101	0.00417078	37.9	3.362	5.696	8.861	1.266	3.92157	8.51266	107.894	6.667	79.55	2.27	2.27	13.64	43.18	0	227.31	731.848	3.01496	4.5489
1102	0.000300984	0	0	0	0	0	0	0	0	0	0	0	0	0	100	0	200.817	718.817	3.05258	0
1103	0.0199829	11.5	2.974	6.987	12.227	3.057	2.1978	37.6953	38.5329	3.333	0	0	0	0	44.44	0.29	146.37	689.282	3.29164	1.89538
1104	0.00238809	36.4	3.48	3.448	16.092	0	5.88235	67.4395	104.686	0	18.75	0	6.25	0	25	0.11	177.499	752.228	3.07878	0.379075
1105	0.00232962	27	3.316	3.175	6.349	4.762	2.63158	13.698	81.5582	0	86.36	0	0	4.55	22.73	0.1	112.26	809.521	3.03166	0.75815
1106	0.00203276	22.1	2.813	2.222	13.333	2.222	0	87.9707	78.7108	12.5	94.44	0	0	0	66.67	0.28	141.999	853.474	2.97777	3.0326
1107	0.00207195	32.8	3.091	2.941	17.647	1.471	19.403	13.2725	106.18	57.143	95	0	0	5	0	0	181.014	831.03	2.97645	0.75815
1108	0.00150386	31.3	3.357	2.128	14.894	0	5.85774	15.264	93.094	2.174	66.67	0	0	0	33.33	0	191.173	797.76	2.99846	0.379075
1109	0.00178518	44.3	3.292	6.329	12.658	0	3.57143	12.4235	134.44	0	72.22	22.22	5.56	27.78	100	0	258.443	825.705	2.98987	0.379075
1110	0.00236947	40.5	3	9.375	14.583	1.042	5.6338	11.3058	135.051	5	80.77	38.46	0	23.08	30.77	0	251.022	857.893	2.968	2.27445
1111	0.00286193	25.2	3.6	1.389	8.333	0	15.2174	12.9507	69.883	50	54.55	13.64	9.09	27.27	63.64	0.22	248.499	890.332	2.94568	0.75815
1112	0.00182962	26.2	3	6.25	18.75	0	16.129	15.1557	87.4498	4.545	82.35	23.53	0	29.41	23.53	0	321.465	952.561	2.93834	0.75815
1113	0.0031914	45.1	3.349	4.167	12.5	1.389	17.6471	9.0156	134.737	46.154	91.43	25.71	0	31.43	54.29	0.07	354.998	937.895	2.98586	0.379075
1114	0.00143988	23.6	2.615	5.882	2.941	2.941	21	16.8269	90.2854	12.121	87.5	62.5	0	50	93.75	0	286.209	873.181	2.98294	0
1115	0.00203628	53	3.273	3.704	12.963	0.926	6.45161	10.6307	162.06	0	84	60	0	52	40	0	292.739	841.579	3.00557	1.5163
1116	0.000763772	49.8	3.455	0	23.684	0	16.2791	16.313	144.022	12.5	72.73	45.45	0	45.45	0	0	327.292	858.627	3.02083	0
1117	0.000749812	44	3	3.03	12.121	0	9.7561	16.9605	146.703	10.256	100	92.31	0	30.77	92.31	0	362.029	876.782	3.02908	0.75815
1118	0.0208283	10	3.2	3.365	15.385	0	0	40.3255	31.2075	0	6.25	0	12.5	0	75	0	181.014	881.798	2.99123	0.75815
1119	0.00379224	17.1	3.421	3.077	10.769	0	0	13.5246	50.1023	0	6.25	0	0	0	12.5	0	177.499	804.837	3.01779	0
1120	0.00486457	34.7	3.38	2.367	12.426	1.183	0	8.1552	100.728	0	0	0	0	7.69	15.38	0	270.359	678.224	3.02578	0.379075
1121	0.00107666	25.1	3.375	7.407	14.815	0	0	17.8088	74.3036	0	0	0	0	0	0	0	206.998	728.396	3.03985	1.89538
1122	0.00176728	37.3	3.3	4.545	6.061	0	15.8333	13.4395	113.168	7.317	0	0	0	0	30	0	191.173	704.652	3.0691	0.379075
1123	0.00198662	29.7	3.278	3.39	13.559	0	25.2427	14.0586	90.6061	2.941	0	0	0	0	0	0	158.76	731.848	3.09058	0
1124	0.00178464	31.4	3.733	5.357	12.5	0	0	14.3417	84.0504	0	0	0	0	0	0	0	146.37	709.997	3.11982	0.75815
1125	0.00156984	30.6	3.429	4.167	6.25	2.083	0	15.1557	89.1812	0	0	0	0	0	0	0	141.999	689.282	3.14971	0.75815
1126	0.00156393	32.6	3.643	0	9.804	0	7.14286	14.8398	89.5181	0	0	0	0	0	0	0	251.022	582.241	3.10148	1.13723
1127	0.00178732	34.1	3.211	8.197	13.115	0	0	13.876	106.305	0	0	0	0	0	30	0	248.499	604.541	3.08561	0.75815
1128	0.00199522	35.6	2.958	5.634	11.268	1.408	0	13.0297	120.288	0	0	0	0	0	50	0	248.499	604.541	3.08561	0.379075
1129	0.00244747	38.4	3.241	2.128	18.085	0	6.38298	11.4267	114.404	6.25	0	0	50	0	66.67	0	146.37	504.548	3.08261	0
1130	0.00172552	23.2	3.636	7.5	7.5	5	11.1111	16.0676	63.7489	0	0	0	0	0	0	0	177.499	502.044	3.07188	0.379075
1131	0.0017867	12.3	3.667	0	4.545	0	8.49057	18.5834	33.5815	1.299	0	0	0	0	50	0	146.37	451.839	3.11618	0
1132	0.00201292	18.4	3.7	5.405	16.216	2.703	9.52381	16.4385	49.6791	0	0	0	0	0	18.18	0	181.014	477.602	3.10453	0.75815
1133	0.0003076	61.8	3.167	15.789	5.263	0	0	19.0814	195.059	1.538	0	0	0	0	100	0	301.226	781.803	3.03426	1.89538
1134	0.000310756	86.9	3.375	14.815	22.222	0	0	17.8088	257.436	0	0	0	0	0	0	0	251.022	778.572	3.02086	0.379075
1135	0.00390105	32	3.205	1.6	18.4	0	3.84615	55.6818	99.9731	0	70.73	17.07	0	14.63	24.39	0	354.998	837.826	3.04545	2.27445
1136	0.00582602	22.7	3.22	9.091	14.394	3.788	6.25	9.49652	70.3739	6.897	71.19	64.41	0	25.42	69.49	0	365.493	887.496	3.03284	1.89538
1137	0.00352403	28.1	3.094	5.051	12.121	2.02	22.1239	11.1291	90.8052	19.512	82.05	69.23	0	30.77	56.41	0	427.475	945.256	3.00567	1.89538
1138	0.000682207	35.2	2.4	4.167	8.333	0	5.88235	18.2656	146.583	5.714	85.71	42.86	0	0	100	0	425.998	974.792	2.95813	0.379075
1139	0.00159982	28.8	2.421	4.348	10.87	0	35.5556	15.3738	118.763	6.25	68.75	12.5	0	0	43.75	0	427.475	1004.71	2.92942	0.75815
1140	0.00257401	23.3	3	3.333	13.333	3.333	34.0909	79.3438	77.6997	5.263	52.38	4.76	0	0	33.33	0	439.109	1065.59	2.84966	1.5163
1141	0.0027048	34.8	2.938	5.319	10.638	3.191	0	11.4267	118.308	0	68	64	4	0	92	0.12	502.044	1073.25	2.85574	0.75815
1142	0.00376245	29	3.114	1.835	11.927	0	13.9535	10.578	90.3668	13.333	71.05	60.53	0	13.16	73.68	0	439.109	1015.32	2.92387	0.379075
1143	0.00280655	34.2	3.2	4.167	21.875	0	18.1818	11.3058	106.893	10	86.21	75.86	3.45	24.14	37.93	0	404.761	986.998	2.94348	4.5489
1144	0.00455086	25.9	2.81	11.864	15.254	2.542	21.6418	10.1267	92.2903	6.383	74.29	71.43	0	11.43	100	0.06	327.292	955.203	2.96361	1.13723
1145	0.00476283	31.1	3.149	4.73	13.514	0.676	25.5319	8.86594	98.6808	9.615	68.42	76.32	0	21.05	92.11	0	292.739	929.12	2.96474	4.16983
1146	0.00536231	29.5	3.362	3.165	12.658	1.899	4.93827	8.51266	87.6488	7.692	64.1	17.95	2.56	28.21	92.31	0.13	370.629	1105.64	2.83019	3.0326
1147	0.00234465	24.7	3.053	6.897	8.621	1.724	25.2747	14.1517	81.0354	12.5	52.63	78.95	0	10.53	78.95	0	251.022	981.877	2.90528	3.41168
1148	0.0058662	26.4	2.981	9.032	16.129	5.161	33.8843	8.61565	88.6434	11.111	82.76	60.34	0	8.62	84.48	0.04	321.465	1029.5	2.87102	10.6141
1149	0.00622654	19.8	3	7.317	13.008	0	26.7857	9.89229	65.8472	13.043	56.82	47.73	0	43.18	95.45	0	392.109	1079.69	2.833	1.5163
1150	0.00138333	27.5	2.533	2.632	10.526	0	29.9065	16.313	108.434	4.762	64.29	21.43	0	35.71	100	0	425.998	1082.02	2.84271	2.27445
1151	0.00267877	23.1	2.696	9.677	12.903	1.613	34.2857	13.7864	85.8604	13.333	68.18	59.09	0	50	100	0	392.109	1031.94	2.8975	10.9932
1152	0.00611225	20.8	2.761	7.874	11.811	2.362	15.625	9.71239	73.6226	0	55.1	26.53	0	26.53	85.71	0.08	462.861	1086.67	2.83021	6.0652
1153	0.00177475	22	2.786	10.256	23.077	2.564	30.8642	16.1893	78.8843	16.667	41.67	58.33	0	50	58.33	0.15	537.21	1122.6	2.79701	0.379075
1154	0.00265938	19.9	2.944	1.887	9.434	0	2.38095	83.149	67.685	0	21.43	0	0	0	85.71	0.22	551.106	1151.97	2.76715	0.379075
1155	0.0024078	15.8	2.923	5.263	13.158	5.263	6.17284	16.313	53.9912	16.667	44.44	27.78	0	27.78	83.33	0.2	541.882	1201.24	2.76067	0.379075
1156	0.00138044	33.3	3.067	2.174	13.043	0	5.03145	15.3738	108.661	1.724	63.64	27.27	0	27.27	100	0	532.498	1192.82	2.7693	0.75815
1157	0.00158351	15.2	3	4.167	4.167	0	6.0241	18.2656	50.5207	3.448	66.67	6.67	0	6.67	86.67	0.25	462.861	1271.07	2.76192	0.379075
1158	0.0169298	17.6	2.95	7.718	15.772	4.362	9.25926	5.46432	58.4768	6.667	54.4	49.6	0.8	60.8	71.2	0.09	502.044	1209.08	2.80876	8.33965
1159	0.0074069	19.6	2.843	4.138	13.793	0.69	0	8.97771	68.8547	0	18.92	10.81	2.7	13.51	8.11	0.14	377.369	1332.55	2.76028	4.16983
1160	0.00367816	28.3	3.467	6.731	11.538	0	0	10.8466	78.8437	0	0	0	5.56	0	16.67	0	351.431	1359.23	2.73702	1.13723
1161	0.00305664	24.2	3.083	2.703	18.919	0	17.6471	72.6906	78.5175	16.667	6.67	13.33	6.67	13.33	0	0.44	277.263	1436.32	2.72491	1.13723
1162	0.00281544	26.3	3.083	13.514	4.054	0	3.125	12.7955	85.2442	4.167	0	0	7.14	0	0	0	255.993	1456.79	2.70483	0
1163	0.00199325	15.1	3	6.667	13.333	0	6.55738	17.3743	50.1694	30	0	70	20	0	30	0	191.173	1531.44	2.67509	0.379075
1164	0.00191208	23	3.143	11.364	6.818	0	15.7895	15.5983	73.2185	33.333	0	60	0	0	40	0	224.521	1506.13	2.69416	2.27445
1165	0.00279835	16.4	3.067	10.87	10.87	2.174	0	15.3738	50.0294	0	0	0	7.14	0	0	0	286.209	1431.04	2.72572	1.5163
1166	0.00281012	31.7	3.87	10.112	12.36	2.247	4.16667	11.7407	81.8469	8.333	0	14.29	14.29	7.14	0	0	303.311	1431.04	2.7245	2.65353
1167	0.00163986	12.8	3.5	14.286	9.524	0	9.78261	18.7465	36.5884	2.941	0	62.5	0	0	100	0	286.209	1482.94	2.68773	0.75815
1168	0.00143649	22.3	2.667	6.25	12.5	0	9.55882	17.0962	83.5367	10.638	0	83.33	0	0	100	0	321.465	1459.38	2.7007	0.379075
1169	0.00311134	23.5	3.042	6.849	9.589	0	26.6667	73.1286	77.1373	0	0	38.46	7.69	15.38	0	0	382.345	1356.45	2.74455	7.20243
1170	0.00361947	27.9	2.971	9.901	16.832	1.98	18.6916	62.5717	93.9365	50	0	11.76	5.88	11.76	0	0	383.99	1330.65	2.7644	1.13723
1171	0.00390156	14.4	3.111	10.714	21.429	0	10.6061	14.3417	46.1354	11.765	36.36	54.55	0	54.55	72.73	0.25	454.62	1256.11	2.78041	0
1172	0.00193119	0	0	0	0	0	0	0	0	0	50	0	0	0	0	0	461.498	1205.95	2.78153	0
1173	0.0339547	10.8	3.137	6.267	13.351	0.817	1.72414	48.1268	33.2796	0	6.67	13.33	1.67	11.67	28.33	0.15	461.498	1565.62	2.96255	1.89538
1174	0.00631792	15	2.969	3.158	12.632	0	3.64372	11.3659	50.6496	10.989	0	39.29	0	28.57	46.43	0.12	444.812	1603.79	2.96963	4.92798
1175	0.00978452	27.7	2.978	7.38	14.76	1.107	3.44828	5.86969	93.004	14.286	0	4.35	17.39	4.35	91.3	0.05	541.882	1508.22	2.9337	4.5489
1176	0.00119906	35	3	0	21.429	0	11.8421	15.8295	116.759	28.169	16.67	16.67	0	33.33	66.67	0	577.896	1431.04	2.89382	0
1177	0.00407462	33.1	3	3.704	21.481	0.741	0	9.37154	103.077	21.429	0	0	22.22	0	22.22	0.09	573.518	1381.3	3.05121	3.41168
1178	0.000834028	18	3.75	0	0	0	3.40909	19.7884	47.96	15.094	83.33	0	0	0	83.33	0.27	543.043	1338.21	3.15551	0
1179	0.0123924	25.4	3.462	6.984	13.016	0.635	7.40741	5.23662	73.4319	13.333	0	0	24.39	4.88	43.9	0	628.056	1450.29	3.05083	6.82335
1180	0.00250284	32	3.2	8.75	5	0	4.83871	12.3516	95.8909	18.182	0	0	62.5	0	62.5	0	604.541	1504.46	3.02333	1.89538
1181	0.00123691	24.3	3.333	13.333	16.667	0	0	17.3743	40.4234	41.667	0	40	0	40	80	0.29	582.241	1538.01	2.99888	2.27445
1182	0.0033688	20.8	2.692	11.429	8.571	0	3.84615	13.1096	65.3052	8.333	7.69	38.46	15.38	7.69	61.54	0.14	527.743	1562.4	2.94737	1.13723
1183	0.00233103	26.6	2.952	4.839	11.29	3.226	11.9403	13.7864	90.0888	36.364	0	9.09	0	9.09	0	0	527.743	1542.92	2.94451	2.27445
1184	0.00088302	28.3	2.778	4	0	4	11.1111	18.1108	90.5982	100	0	0	25	25	25	0	582.241	1477.83	2.97993	0.379075
1185	0.000547076	0	0	0	0	0	0	0	0	0	0	0	0	0	0	0	454.62	1604.18	2.96102	0
1186	0.014429	15.5	3.097	8.072	10.314	0.448	0	6.76141	48.5133	0	4.65	16.28	13.95	13.95	0	0.14	356.769	1147.04	3.1654	4.92798
1187	0.0103829	23.9	3.179	7.661	14.516	1.613	3.65854	35.5947	68.3819	21.429	27.08	18.75	10.42	20.83	37.5	0.1	461.498	1270.08	3.09917	2.65353
1188	0.00746063	36.7	3.383	6.569	15.693	1.095	2.04082	5.8217	103.208	29.412	48.98	28.57	8.16	34.69	75.51	0	555.661	1365.71	2.99229	6.82335
1189	0.0129234	27.4	3.133	4.237	17.232	1.412	0	71.9	85.891	0	39.71	29.41	4.41	39.71	60.29	0.14	498.264	1407.96	2.85715	0.379075
1190	0.0299457	2.1	3.444	9.677	14.516	0	0	142.853	5.34301	0	45.45	31.82	0	40.91	81.82	0.28	477.602	1271.07	2.84999	4.92798
1191	0.00352098	29	3.188	4.902	10.784	0.98	6.09756	10.9578	82.3635	4.348	57.69	30.77	0	34.62	100	0.15	377.369	1181.67	2.95016	1.89538
1192	0.00159624	14.4	2.875	8.696	4.348	0	9	18.4232	37.5884	6.897	71.43	14.29	0	14.29	85.71	0	413.996	1224.1	3.02206	0
1193	0.00397808	11.3	2.647	22.222	13.333	0	11.3402	15.4853	37.7067	37.931	25	31.25	0	37.5	81.25	0	334.905	1144.84	3.02338	0.379075
1194	0.000337537	0	0	0	0	0	5.12821	0	0	9.091	0	0	0	0	0	0	303.311	1111.32	3.07516	0
1195	0.00306074	18	3.056	9.091	12.727	1.818	9.09091	14.4387	42.4733	0	45	35	0	40	85	0.33	349.633	1109.05	2.83881	4.16983
1196	0.00656125	25.5	3.093	7.784	11.976	1.198	25.3012	46.6856	74.6809	72	56.1	36.59	2.44	41.46	78.05	0.05	301.226	1102.78	2.94808	3.0326
1197	0.000428998	0	0	0	0	0	8.69565	0	0	16.667	100	0	0	0	50	0	255.993	1044.08	2.93666	0
1198	0.000589932	42.4	3.571	16	20	4	0	18.1108	101.707	0	83.33	0	0	0	100	0	286.209	1065	2.89523	0
1199	0.00061727	32.4	3.333	5	20	0	21.5278	18.9124	97.2022	8.511	87.5	0	0	25	62.5	0.42	317.52	1086.67	2.85635	0.379075
1200	0.00213044	31	3.143	3.03	10.606	0	0	13.4395	93.8773	0	0	0	0	7.69	100	0	238.14	1015.32	2.93929	0.75815
1201	0.00493828	21.5	2.944	5.66	11.321	4.717	6.25	111.261	70.8749	90.909	3.13	0	0	0	100	0	206.998	994.629	2.98048	3.0326
1202	0.0029254	25	3.174	8.219	6.849	1.37	6.0241	12.8726	75.2035	4.819	0	0	0	0	88.89	0	177.499	974.792	3.02047	0.379075
1203	0.0015208	17.1	3.25	3.846	7.692	0	10.6061	17.9585	52.604	0	0	0	0	0	100	0	150.613	955.863	3.05885	0
1204	0.00157231	26.7	3.818	4.762	19.048	0	4.54545	15.8295	69.9606	0	18.18	9.09	0	0	0	0	191.173	1000.31	3.07918	0.75815
1205	0.00083853	27.4	3.286	4.348	4.348	4.348	5	18.4232	83.4794	57.143	16.67	33.33	0	0	0	0	238.14	1048.3	3.0346	0.379075
1206	0.00255958	26.2	2.792	8.955	13.433	0	3.26087	13.3555	89.8585	11.538	7.14	42.86	14.29	14.29	0	0	258.443	1063.81	3.07646	0.75815
1207	0.00511746	21.3	3.114	9.174	11.927	0	12.6984	10.578	66.4392	17.391	14.81	59.26	3.7	25.93	0	0.09	215.937	1016.56	3.10103	2.65353
1208	0.00411079	12.6	3.059	7.692	9.615	0	2.50696	152.708	41.3546	18.487	4.35	52.17	8.7	0	0	0.25	215.937	988.911	3.19664	0.75815
1209	0.00455751	18.9	3.185	4.651	9.302	1.163	4	11.9375	54.8545	22.222	63.89	38.89	0	33.33	86.11	0.2	351.431	1151.97	2.93115	1.89538
1210	0.00479081	23.8	3.081	7.018	11.404	0	18.1818	10.3225	62.6199	16.667	38.46	23.08	0	26.92	80.77	0	383.99	1164.48	2.83644	2.27445
1211	0.00446269	49.1	3.129	3.196	12.329	0	0	6.8481	156.856	0	5.56	16.67	0	16.67	83.33	0	797.76	595.086	3.25783	0
1212	0.014177	30.3	3.201	7.925	15.618	1.166	2.22222	4.0929	91.6978	5.556	18.87	24.53	11.32	20.75	62.26	0	754.737	527.743	3.23063	3.79075
1213	0.000179593	0	0	0	0	0	6.58915	0	0	3.333	0	0	0	0	100	0	731.848	572.418	3.21787	0
1214	0.00215391	25.5	3.056	7.273	21.818	0	11.5646	14.4387	83.5688	24	0	37.5	0	37.5	100	0	704.652	537.21	3.18674	1.13723
1215	0.00219175	42.4	3.1	5.376	18.28	1.075	0	11.4882	132.314	0	0	0	44.44	0	33.33	0	718.817	603.497	3.19515	0
1216	0.000909798	0	0	0	0	0	5.88235	0	0	0	0	33.33	0	33.33	0	0	669.81	569.106	3.23406	0
1217	0.00771514	6.5	2.778	8	12	0	0	84.8939	19.4423	25	0	18.18	9.09	36.36	27.27	0.43	652.657	466.928	3.2474	0.379075
1218	0.0113071	1.6	3.6	0	11.111	0	8	109.377	3.53761	5.714	0	50	0	0	0	0.43	660.335	415.515	3.31596	0
1219	0.00276122	0	0	0	0	0	2.63158	0	0	20	0	0	0	0	100	0	700.166	413.996	3.32145	0
1220	0.00515271	7.4	2.923	10.526	13.158	10.526	0	16.313	25.2294	0	0	0	50	0	0	0	635.041	334.905	3.3639	0.75815
1221	0.00967843	22	3.132	8.92	15.023	4.225	16.1765	6.9824	69.2261	24	9.52	26.19	4.76	26.19	78.57	0.19	762.214	454.62	3.28892	0
1222	0.00823886	21.6	3.236	11.798	13.483	0.562	12.6984	81.6963	66.7568	13.699	10.34	44.83	3.45	34.48	86.21	0.2	825.705	502.044	3.2762	2.27445
1223	0.00121069	18.2	4.4	4.545	18.182	0	6.15385	18.5834	33.039	14.925	0	16.67	0	33.33	100	0.38	873.181	552.248	3.26918	0.379075
1224	0.000827051	0	0	0	0	0	8.16327	0	0	11.111	50	50	0	50	100	0	827.992	532.498	3.26541	0
1225	0.00704295	30	2.89	8.057	18.009	0.474	6.45161	7.02834	103.65	4.545	9.68	41.94	12.9	41.94	96.77	0	800.913	554.525	3.23107	3.41168
1226	0.00934308	31	3.295	7.931	14.483	2.069	0	57.8034	93.117	27.027	17.02	36.17	6.38	38.3	100	0.1	854.95	555.661	3.25237	12.1304
1227	0.00229307	22.7	2.889	9.615	7.692	0	0	14.7375	65.4144	0	50	44.44	0	50	88.89	0.23	816.496	494.456	3.23756	1.5163
1228	0.00430675	16.3	2.8	8.571	8.571	4.286	14.4231	13.1096	58.0484	6.25	5.56	33.33	0	38.89	94.44	0	780.997	461.498	3.25523	2.27445
1229	0.00987824	16.3	3.157	6.832	16.149	3.106	2.04082	8.4121	50.6163	60	24.53	22.64	7.55	20.75	79.25	0	713.538	433.331	3.25732	1.13723
1230	0.00361128	34.6	2.976	10.4	15.2	2.4	12.6506	55.6818	113.533	25.455	22.73	45.45	13.64	45.45	86.36	0	642.93	377.369	3.28844	3.41168
1231	0.00226742	38.4	3.346	3.448	17.241	0	0	11.8712	114.668	0	20	60	20	50	100	0	543.043	334.905	3.30682	5.68613
1232	0.00193044	35.2	3.091	4.412	10.294	1.471	3.37838	13.2725	113.964	2.174	50	35.71	21.43	42.86	100	0	585.478	383.99	3.33366	0.75815
1233	0.00346223	32.3	3.2	11.607	12.5	0.893	7.59494	10.4232	101.091	23.077	5.56	38.89	11.11	38.89	33.33	0	595.086	413.996	3.34681	0
1234	0.00341859	0	0	0	0	0	0.862069	0	0	7.692	0	100	0	100	66.67	0	639.983	462.861	3.41219	0
1235	0.000561202	19.6	2.75	18.182	18.182	0	15.9292	20.5497	71.2756	7.317	0	0	0	0	0	0	699.266	541.882	3.32453	0
1236	0.00416339	23.3	3.129	8.247	14.433	2.062	0	11.2463	69.6548	50	0	23.53	0	23.53	76.47	0	718.817	532.498	3.30973	1.89538
1237	0.000955834	15.7	2.5	46.667	13.333	0	10.2151	19.7884	62.7724	27.473	0	80	0	80	100	0	673.562	482.85	3.32988	1.89538
1238	0.00314474	25.4	3.077	5	20	2.5	10.4651	70.1689	82.6778	10.345	35	50	0	55	90	0	724.058	477.602	3.27476	1.5163
1239	0.0219519	27.6	3.151	6.942	13.058	0.661	9.92908	3.06082	82.9085	23.256	23.16	53.68	11.58	44.21	64.21	0.03	603.497	305.381	3.35588	5.30705
1240	0.00457629	32.8	3.261	9.333	12.667	8	12.037	8.79296	93.9627	12.821	16	28	16	40	32	0	473.627	303.311	3.28793	6.0652
1241	0.00174533	30.4	3.786	1.887	7.547	0	10	14.6365	80.214	0	10	0	0	0	60	0	362.029	248.499	3.24884	1.89538
1242	0.00277656	39.6	2.973	10	15.455	3.636	2.32558	10.5259	122.454	7.692	38.1	47.62	0	28.57	52.38	0	427.475	224.521	3.23987	2.65353
1243	0.00279708	42.2	2.878	5.932	13.559	0.847	3.07692	10.1267	139.431	4.348	36.36	54.55	0	31.82	100	0	425.998	191.173	3.23369	1.13723
1244	0.00467057	20.6	3.31	1.042	21.875	0	14.5455	11.3058	62.091	30.769	20.83	66.67	0	45.83	45.83	0	427.475	158.76	3.24321	1.13723
1245	0.0143595	11.5	3.173	3.03	15.758	0	0	47.0475	35.5165	0	13.64	45.45	18.18	40.91	18.18	0.1	569.106	255.993	3.24393	0.75815
1246	0.0107441	14.3	3.143	9.74	14.935	0	0	8.65054	45.6065	21.839	22.5	67.5	7.5	27.5	35	0.37	508.28	158.76	3.2253	1.13723
1247	0.000550781	0	0	0	0	0	4.7619	0	0	0	0	100	0	50	100	0	561.302	177.499	3.19484	0
1248	0.00385953	24.4	3.357	6.383	20.213	1.064	9.52381	64.9145	72.5477	0	12.5	31.25	12.5	31.25	18.75	0.13	382.345	319.499	3.24897	2.27445
1249	0.00362412	25.1	3.5	2.198	14.286	0	9.375	11.6131	71.7416	0	0	0	0	0	0	0	112.26	920.946	3.11958	2.27445
1250	0.0031155	28.2	3.034	2.273	11.364	1.136	0	11.8056	93.0828	25	10.53	5.26	0	0	0	0	106.5	905.072	3.15066	0.379075
1251	0.00108106	28.7	3.1	0	6.452	0	4.54545	17.2342	92.5022	0	0	0	0	0	0	0	112.26	890.332	3.182	0
1252	0.00251957	0	0	0	0	0	8.53659	0	0	0	0	0	0	0	0	0	79.3801	811.076	3.24767	0
1253	0.00533706	0	0	0	0	0	0	0	0	0	0	0	0	0	0	0	35.4998	827.992	3.22629	0
1254	0.00112846	37.2	3.231	0	19.048	7.143	5.49451	15.8295	115.201	6.25	0	0	25	0	0	0	79.3801	876.782	3.10872	0
1255	0.0093063	0	0	0	0	0	2.12766	0	0	0	0	0	0	0	0	0.21	79.3801	746.342	3.38462	0
1256	0.0036035	23.6	3.542	9.412	5.882	3.529	1.88679	124.39	61.0518	0	0	0	0	0	22.22	0	177.499	652.657	3.20397	1.5163
1257	0.00305444	19.3	3.278	10.169	13.559	3.39	3.125	79.8659	55.6567	25.926	0	0	0	0	25	0	158.76	651.691	3.18854	0.75815
1258	0.00308274	19.5	3.529	5	3.333	0	4.6875	13.9667	55.1458	0	0	0	0	0	23.53	0	191.173	620.994	3.15709	0
1259	0.00283237	23.3	3.667	4.545	6.061	4.545	9.83607	13.4395	60.0203	0	0	0	0	0	18.75	0	238.14	572.418	3.15889	0.75815
1260	0.00372911	20.4	3.304	2.632	9.211	0	3.44828	12.6441	61.6769	0	0	0	0	0	0	0.1	255.993	555.661	3.15989	0.379075
1261	0.00175867	20.5	2.769	5.556	13.889	0	8.57143	16.566	73.9197	0	0	0	0	0	0	0	286.209	476.28	3.14863	0
1262	0.00137932	31.9	3.143	4.545	9.091	2.273	5.45455	15.5983	101.499	5.263	0	0	0	0	0	0	270.359	493.18	3.12752	1.13723
1263	0.00187592	28.8	3.857	5.556	7.407	3.704	4.08163	14.5369	74.6301	0	0	0	0	0	20	0	224.521	482.85	3.12481	0.75815
1264	0.00183601	23.4	3.909	0	9.302	0	5.76923	15.713	59.9126	0	0	0	0	0	0	0	227.31	413.996	3.17323	1.89538
1265	0.00188687	15.9	3.333	13.333	3.333	3.333	14.4928	17.3743	47.6981	14.286	0	0	0	0	40	0	277.263	428.946	3.1899	0
1266	0.00161562	46.4	3.409	4	12	0	11.7647	12.7193	129.981	0	33.33	33.33	0	50	33.33	0.29	277.263	382.345	3.21675	0.75815
1267	0.00143846	27.1	3.545	0	15.385	0	0	16.1893	76.4704	0	12.5	0	0	0	50	0	251.022	396.9	3.20322	0
1268	0.00155523	23.8	3.083	10.811	5.405	0	2.5	16.4385	77.1592	0	0	0	0	0	50	0	200.817	383.99	3.20188	0.75815
1269	0.000739405	20.3	3.75	0	13.333	0	5.88235	19.7884	54.0975	7.692	0	0	0	0	50	0	177.499	404.761	3.17732	0
1270	0.000523483	26.7	3.5	14.286	0	0	0	19.9734	76.4113	0	0	0	0	0	0	0	158.76	327.292	3.23233	1.5163
1271	0.00123059	21.1	3.714	0	7.692	0	0	17.9585	56.8833	0	0	0	0	0	0	0	206.998	334.905	3.23818	0.75815
1272	0.00310897	19.3	3.158	10	10	0	9.61538	13.9667	61.1135	6.944	0	0	0	0	0	0	238.14	317.52	3.25117	1.13723
1273	0.00428407	28.5	3.128	9.836	13.934	2.459	12.6214	9.9383	91.0349	29.412	20	56	0	36	8	0	482.85	336.781	3.30644	0.379075
1274	0.00535506	29.7	3.457	6.918	16.352	6.289	4	8.47887	82.1652	28.571	20	36.67	13.33	36.67	10	0.12	413.996	390.498	3.27417	1.5163
1275	0.00640823	42.6	3.289	4.762	13.919	1.832	0	5.83761	127.96	0	39.47	28.95	15.79	26.32	0	0.06	433.331	425.998	3.28609	3.41168
1276	0.00291152	25.4	3.217	5.405	18.919	0	0	12.7955	78.9966	0	35.29	47.06	17.65	0	82.35	0	540.718	415.515	3.3624	2.65353
1277	0.00253297	24.1	2.773	18.033	11.475	1.639	0	13.876	86.8546	0	8.33	50	0	25	91.67	0	555.661	449.042	3.37879	1.13723
1278	0.00350423	31.4	2.973	4.545	10.909	0.909	17.1429	10.5259	99.8793	31.429	20	50	15	30	35	0	573.518	516.886	3.36936	2.65353
1279	0.000260051	53.8	3.5	7.143	14.286	0	7.58929	113.467	153.816	6.667	50	0	0	0	100	0	511.986	466.928	3.33939	0
1280	0.00478287	25.5	2.837	10.656	16.393	0.82	7.53968	9.9383	89.9043	2.439	16.67	25	4.17	12.5	41.67	0	454.62	461.498	3.28026	3.41168
1281	0.00370981	32.3	3.158	3.333	20.833	1.667	3.75	56.9891	102.431	0	47.83	43.48	30.43	21.74	0	0	494.456	537.21	3.31408	1.13723
1282	0.00461092	28.2	3.333	5.385	9.231	1.538	9.7561	9.58171	84.5818	7.692	33.33	51.85	11.11	25.93	25.93	0	449.042	569.106	3.27364	5.30705
1283	0.00251242	16.7	3.231	9.524	11.905	2.381	20	15.8295	51.7429	0	68.42	52.63	0	21.05	94.74	0	396.9	533.68	3.24868	1.13723
1284	0.00232846	22.8	2.944	3.774	13.208	0	2.63158	14.6365	77.3043	0	40	33.33	6.67	13.33	66.67	0	404.761	603.497	3.23339	0.75815
1285	0.00217535	32.2	3.182	4.286	14.286	1.429	7.93651	13.1096	96.5362	15.556	56.25	43.75	0	18.75	100	0	349.633	572.418	3.19763	0.75815
1286	0.000516155	36.8	3.167	0	26.316	0	2.77778	19.0814	116.244	0	0	0	0	0	100	0	365.493	537.21	3.22566	2.27445
1287	0.000186553	0	0	0	0	0	12.844	0	0	2.326	0	0	0	0	100	0	383.99	502.044	3.21419	0
1288	0.00140087	0	0	0	0	0	5.47945	0	0	0	0	0	0	0	100	0	317.52	577.896	3.19297	0
1289	0.000180867	0	0	0	0	0	0	0	0	26.531	0	0	0	0	0	0	354.998	508.28	3.18185	0
1290	0.00795185	30.3	3.171	9.129	12.863	0.83	5	36.3408	94.3177	0	38.3	42.55	12.77	29.79	40.43	0	502.044	647.811	3.25154	1.13723
1291	0.00241367	22.8	3.056	10.909	14.545	1.818	5.17241	14.4387	74.5752	5.882	9.09	9.09	9.09	27.27	100	0	572.418	663.192	3.25357	1.13723
1292	0.00365661	13.1	3	8.333	16.667	0	7.92079	15.1557	41.0216	24.299	23.53	76.47	5.88	70.59	17.65	0	561.302	551.106	3.33783	1.13723
1293	0.00270463	29.2	3.038	10.127	15.19	0	8.10811	12.4235	96.1316	7.843	44.44	66.67	11.11	50	77.78	0	635.041	508.28	3.35029	0.379075
1294	0.00125755	89.1	3.5	10.714	15.179	2.679	0	10.4232	254.464	0	28.57	42.86	14.29	28.57	100	0	673.562	555.661	3.33313	0.75815
1295	0.00141854	42.3	3.529	5	16.667	3.333	46.1538	13.9667	119.841	50	33.33	44.44	22.22	22.22	66.67	0	654.585	619.978	3.29101	0.75815
1296	0.00326747	39.5	3.308	6.202	17.054	0	8.10811	9.62488	119.358	0	17.65	41.18	29.41	17.65	47.06	0	619.978	606.622	3.30262	1.5163
1297	0.00171045	24.6	3	14.286	16.667	0	11.3636	15.8295	81.8498	6.667	0	0	16.67	33.33	33.33	0	607.659	673.562	3.249	0
1298	0.00184142	0	0	0	0	0	2.8169	0	0	53.846	25	0	0	0	0	0	642.93	685.616	3.24018	0
1299	0.00306964	26.7	3.037	2.439	18.293	0	2.63158	69.3668	87.9581	7.692	0	18.18	18.18	18.18	0	0	717.94	639.983	3.23876	0
1300	0.00191686	20.3	3	10.256	2.564	0	0	16.1893	67.8193	0	0	12.5	12.5	12.5	50	0	713.538	638.997	3.19985	0
1301	0.00207406	16.4	2.833	11.765	2.941	5.882	0	16.8269	57.8574	0	0	0	0	0	30	0	675.431	675.431	3.20309	1.13723
1302	0.000569763	0	0	0	0	0	1.25	0	0	6.897	0	0	0	0	0	0.29	700.166	604.541	3.17511	0
1303	0.000628173	0	0	0	0	0	3.57143	0	0	0	33.33	0	0	0	66.67	0	709.997	642.93	3.15885	0
1304	0.0011615	0	0	0	0	0	6.66667	0	0	13.333	0	0	20	0	0	0.43	675.431	682.853	3.21106	0
1305	0.000996859	32.1	2.909	6.25	21.875	0	1.40845	17.0962	110.347	3.704	0	0	50	0	75	0	638.997	713.538	3.18299	0
1306	0.00309239	27.5	3.269	7.059	14.118	3.529	0	12.0046	84.0774	0	0	0	46.15	0	15.38	0	603.497	741.259	3.19056	1.13723
1307	0.00153627	0	0	0	0	0	0	0	0	0	0	0	20	0	100	0	642.93	724.058	3.13923	0
1308	0.000234994	0	0	0	0	0	8.10811	0	0	14.286	0	0	100	0	100	0	612.822	766.336	3.24646	0
1309	0.00532005	27.4	3.318	4.11	10.959	0	0.990099	8.94014	82.7059	1.429	0	0	12.5	4.17	66.67	0	569.106	766.336	3.16409	1.13723
1310	0.0056564	20.3	3.108	9.565	16.522	1.739	8.72483	10.2728	65.4126	41.667	4	0	8	4	12	0	502.044	788.225	3.15144	1.5163
1311	0.00550545	28.7	3.435	5.063	12.025	0	0	48.3598	83.5535	0	0	0	25	0	0	0.08	466.928	784.217	3.20607	0.75815
1312	0.00567466	18.9	3.242	11.215	4.673	0	3.99002	10.6838	56.391	18.248	0	68	0	0	40	0.08	494.456	639.983	3.22653	0.75815
1313	0.00460432	11.7	2.842	25.926	12.963	0	4.21348	82.5832	41.2656	13.71	0	90	5	5	80	0.27	551.106	635.041	3.17221	0.379075
1314	0.00449888	4.9	2.444	18.182	0	0	13.7931	18.5834	20.005	0	0	46.67	13.33	6.67	0	0.11	396.9	767.979	3.2878	0
1315	0.00212387	17.9	3.8	10.526	2.632	0	0	16.313	47.0839	0	0	50	0	10	100	0	415.515	709.997	3.28041	0.75815
1316	0.0032054	11.2	2.4	19.444	13.889	0	3.19149	16.566	46.7961	25.806	0	83.33	0	25	0	0	321.465	837.826	3.33318	0
1317	0.00517555	15.5	2.963	10	7.5	0	0	70.1689	52.1684	0	0	43.48	4.35	0	69.57	0.13	212.999	931.829	3.44959	0
1318	0.00235822	18.2	2.688	16.279	6.977	0	3.76569	89.2648	67.8477	31.25	0	50	0	0	0	0	212.999	931.829	3.36621	0.75815
1319	0.00997562	15.4	3.208	16.234	9.091	0.649	4.78723	49.1431	48.1173	1.408	20.93	44.19	2.33	6.98	100	0.26	277.263	809.521	3.55811	1.5163
1320	0.00562234	0	0	0	0	0	21.875	0	0	46.667	5.88	64.71	0	11.76	82.35	0.41	404.761	689.282	3.33316	0
1321	0.00936829	12.2	2.85	17.544	4.386	0.877	10.2439	10.3225	41.6298	42.857	11.43	65.71	2.86	5.71	68.57	0.07	427.475	654.585	3.23999	1.5163
1322	0.00602694	30.2	3.193	9.341	11.538	0.549	10.8108	7.76962	92.9161	35.897	21.21	45.45	3.03	6.06	100	0	286.209	803.27	3.36205	0.75815
1323	0.00778524	27.7	3	12.037	10.185	1.852	0	39.2814	89.9138	66.667	12.5	60	5	2.5	90	0	349.633	754.737	3.32969	0.75815
1324	0.00627873	21	3.143	1.515	15.152	0	6.86275	9.49652	66.8926	10.811	12.5	45.83	8.33	12.5	95.83	0.1	462.861	628.056	3.2911	1.5163
1325	0.0229083	19	3.152	6.667	13.563	2.069	7.21649	41.9281	59.8036	7.692	2.67	42.67	17.33	5.33	0	0.19	439.109	905.072	3.32401	0.75815
1326	5.1382e-05	0	0	0	0	0	0	0	0	0	0	0	0	0	0	0	569.106	718.817	3.32401	0
1327	1.87685e-05	0	0	0	0	0	8.16327	0	0	63.158	0	0	0	0	0	0	533.68	731.848	3.32401	0
1328	0.0102928	37.2	3.064	8.094	11.749	1.305	2.52101	25.4987	120.473	31.111	2.27	47.73	6.82	6.82	9.09	0	444.812	1016.56	3.19478	1.89538
1329	0.00583281	0	0	0	0	0	7.69231	0	0	40.625	0	0	0	0	0	0	508.28	988.911	3.29744	0
1330	0.00678494	24.6	2.93	5.988	9.581	1.796	4.44444	8.21794	82.5358	31.034	0	46.15	26.92	11.54	19.23	0.07	482.85	1065.59	3.17087	1.5163
1331	0.0043786	26.9	3.371	11.017	12.712	0.847	0.581395	10.1267	79.9342	16.129	0	43.75	6.25	12.5	0	0	404.761	1175.79	3.20848	2.27445
1332	0.00413445	23	3.276	12.632	9.474	6.316	4.46429	11.3659	70.1423	11.429	0	70.59	17.65	5.88	23.53	0.09	454.62	1176.33	3.17657	0.75815
1333	0.00990126	35.8	3.052	8.192	12.429	0.847	5.19481	4.77969	117.157	14.286	0	36.59	26.83	2.44	19.51	0	454.62	1070.31	3.17628	0.379075
1334	0.00440714	39	3.245	7.558	16.86	0	0	8.06286	117.99	0	14.29	42.86	9.52	0	0	0	413.996	1079.69	3.19517	4.16983
1335	0.00138376	23.1	2.667	12.5	6.25	3.125	2.5	17.0962	86.7201	0	0	0	0	0	0	0	428.946	1120.92	3.19843	0
1336	0.000288058	55.5	4	12.5	6.25	0	4.41176	19.6067	138.861	33.333	0	0	0	0	0	0	365.493	1051.3	3.20257	0
1337	0.0110455	30.1	3.112	9.61	14.414	0.3	3.7037	5.01533	96.8724	2.273	36.36	56.06	6.06	19.7	21.21	0.08	390.498	709.997	3.15886	1.5163
1338	0.00419066	38.9	3.543	4.294	17.178	0	0	8.34637	107.382	0	25	45.83	8.33	4.17	8.33	0	319.499	713.538	3.16634	3.41168
1339	0.00345983	40.2	3.022	2.158	14.388	0.719	9.65517	52.3211	130.064	13.333	30	40	15	20	0	0	327.292	642.93	3.18099	1.89538
1340	0.0144917	0	0	0	0	0	0	0	0	0	0	0	0	0	0	0	215.937	766.336	3.19504	0
1341	0.00133482	0	0	0	0	0	3.22581	0	0	16.667	0	0	0	0	0	0	227.31	878.218	3.21922	0
1342	0.000194209	0	0	0	0	0	0	0	0	0	0	0	0	0	0	0	277.263	947.254	3.22054	0
1343	0.00299457	6.7	2.857	10	0	15	0	195.968	23.3757	0	0	0	0	0	0	0.31	238.14	965.7	3.18266	0.75815
1344	0.0176424	0	0	0	0	0	14.2857	0	0	66.667	50	0	0	0	0	0	354.998	1009.72	3.1699	0
1345	0.00408712	21.5	3.259	11.364	11.364	0	0	11.8056	66.0611	0	0	0	0	0	0	0.1	349.633	854.95	3.17844	2.27445
1346	0.00438794	15.7	3.286	13.043	8.696	1.449	19.2308	13.1906	47.8585	53.846	0	0	0	0	0	0	404.761	816.496	3.13787	2.27445
1347	0.00347749	20.4	2.63	16.901	18.31	0	10	13.0297	77.6423	5.556	0	0	7.69	7.69	0	0	439.109	817.268	3.13776	0.75815
1348	0.00876722	24.3	2.958	3.286	18.31	0	0	6.9824	80.9834	55.556	37.5	0	6.25	0	75	0.32	494.456	890.332	3.38492	0.75815
1349	0.003007	31.9	3.31	2.083	7.292	0	0	11.3058	96.4417	0	0	0	0	0	45	0	415.515	1128.2	3.20197	0.379075
1350	0.00415927	20.2	3.111	4.762	9.524	0	7.05128	12.0724	64.9152	13.462	0	0	0	0	18.18	0	439.109	1170.96	3.20865	0
1351	0.000514106	33.1	2.833	0	23.529	0	0	19.4284	116.708	0	0	0	0	0	0	0	258.443	654.585	3.1941	0
1352	0.00258903	20.9	3.375	7.407	20.37	0	3.125	14.5369	61.7992	0	0	0	18.18	0	100	0	482.85	1197.56	3.20603	0.75815
1353	0.00577863	34.4	3.159	3.518	20.101	0	1.6	7.31722	107.292	26.667	0	20	20	0	60	0.09	540.718	1267.1	3.19906	0.379075
1354	0.00531873	25.2	2.978	8.955	14.925	1.493	2.22222	9.41284	84.6066	0	0	66.67	4.17	0	16.67	0.07	527.743	1301.93	3.1929	0
1355	0.00551612	25.4	3.256	8.571	18.571	0	2.27273	9.1704	76.1405	21.429	0	44	4	0	72	0.07	482.85	1330.65	3.17622	1.5163
1356	0.00632534	21	2.956	13.534	9.774	0	4.13223	9.45449	71.1425	26.667	0	60	0	0	16.67	0	466.928	1388.58	3.18529	1.5163
1357	0.010824	12.5	2.813	8.889	9.63	1.481	3.35366	9.37154	44.3459	11.207	3.85	19.23	0	3.85	50	0	382.345	1260.62	3.2413	0
1358	0.00604329	11.4	2.875	18.841	5.797	5.797	0	13.1906	39.7135	0	0	58.33	0	0	0	0.09	327.292	1132.66	3.25643	2.65353
1359	0.000101199	0	0	0	0	0	0	0	0	0	100	0	0	0	0	0	206.998	1136.55	3.27403	0
1360	2.89255e-05	0	0	0	0	0	0	0	0	0	100	0	0	0	0	0	238.14	1164.48	3.27403	0
1361	0.00717161	22.4	3.038	10.559	11.18	0.621	0.8	47.7886	71.1137	20.833	0	65.71	0	0	0	0	427.475	1378.56	3.22181	0
1362	0.00308208	9.7	3	23.333	13.333	3.333	2.7027	180.031	29.201	25.49	35.29	70.59	0	0	0	0.29	461.498	1427.96	3.2073	0
1363	0.0206727	18.9	3.223	7.436	13.077	1.282	1.9802	25.1291	57.564	20.588	1.59	4.76	23.81	4.76	0	0.17	612.822	1394.92	3.1539	0.75815
1364	0.00688117	9.6	2.87	12.121	9.091	0	7.27273	139.258	31.9713	23.529	13.64	40.91	9.09	9.09	0	0.53	639.983	1516.55	3.14633	0
1365	0.00388624	47.6	3.426	6.486	10.27	0	0	43.6623	136.378	0	0	0	43.75	0	100	0	604.541	1380.85	3.15524	1.89538
1366	0.00326398	28.2	3.286	3.261	19.565	1.087	0	11.5503	85.7849	25	0	15.38	30.77	7.69	92.31	0	533.68	1313.49	3.18812	1.89538
1367	0.0094508	12.6	2.705	15.966	5.882	0.84	4.7619	57.258	46.5569	43.75	0	70	0	5	100	0.15	150.613	931.829	3.40492	0
1368	0.0048567	20.8	3.156	6.931	16.832	0.99	4.38596	11.0143	63.8293	52.273	0	25	4.17	4.17	79.17	0	191.173	903.679	3.39174	2.27445
1369	0.0117822	0	0	0	0	0	0	0	0	50	0	50	0	0	100	0.29	35.4998	1105.64	3.2937	0
1370	0.00659517	19.1	2.739	19.841	11.111	2.381	12.5	9.75675	68.2318	23.214	0	33.33	0	3.33	36.67	0.12	79.3801	1104.5	3.31056	0.75815
1371	0.0145167	17.3	3.138	13.546	11.155	1.195	0	35.2842	55.1088	33.333	0	59.65	14.04	3.51	17.54	0	146.37	1155.79	3.28681	0
1372	0.0059305	4	2.667	50	0	4.167	2.47934	18.2656	15.1758	28.571	0	16.67	8.33	16.67	66.67	0.34	270.359	1330.65	4.09571	0
1373	0.00912531	0	0	0	0	0	0	0	0	0	0	100	0	0	0	0	349.633	1406.62	4.24093	0
1374	0.00680756	18.8	2.977	15.625	10.156	1.563	16.3636	9.66844	61.6961	43.75	0	22.73	18.18	9.09	36.36	0.18	555.661	1609.67	3.10744	1.13723
1375	0.000631609	0	0	0	0	0	13.1579	0	0	34.694	100	88.89	0	55.56	66.67	0	572.418	1633.38	3.04915	0
1376	0.00628955	5.6	2.917	34.286	8.571	0	2.53807	94.8456	17.4893	28.571	0	33.33	0	28.57	14.29	0.5	567.998	1786.67	3.03415	0.75815
1377	0.0014394	25.7	3.364	5.405	16.216	0	4.34783	16.4385	76.4209	37.5	12.5	12.5	0	0	0	0	532.498	1813.62	2.95441	0
1378	0.00368637	17.6	3.095	13.846	16.923	0	4.20168	13.5246	54.2539	9.524	0	7.14	7.14	0	0	0	533.68	1790.9	2.98324	2.65353
1379	0.0117043	20.8	3.342	13.115	13.525	0.82	5.7377	36.0172	61.5159	26.19	0	6.25	12.5	2.08	37.5	0.04	587.627	1636.46	3.09599	1.5163
1380	0.00548678	18	3.094	14.141	12.121	0	27.2727	11.1291	58.322	60	0	27.27	9.09	13.64	0	0.18	606.622	1641.08	3.15543	3.79075
1381	3.60801e-05	0	0	0	0	0	0	0	0	36.364	100	0	0	0	0	0	551.106	1722.02	3.15543	0
1382	0.0271689	1	3.5	17.857	7.143	7.143	0	348.353	2.94454	0	15.38	7.69	7.69	0	23.08	0.45	396.9	1965.36	2.92599	1.13723
1383	3.07115e-05	0	0	0	0	0	6.50407	0	0	37.143	0	0	0	0	0	0	258.443	2011	3.35796	0
1384	0.0161724	20.6	3.112	4.204	16.517	0.901	1.21951	75.4447	65.544	3.448	0	0	0	0	0	0.29	112.26	1937.91	2.98133	0.379075
1385	0.0166187	9.9	3.367	3.03	5.455	3.03	0	8.28166	28.2815	0	0	0	2.56	0	51.28	0.1	255.993	1794.06	3.36309	1.89538
1386	0.00559655	14.7	2.929	12.195	6.098	1.22	10	69.3668	50.0308	50	15.38	0	11.54	15.38	19.23	0.23	365.493	1683.16	2.97904	0.75815
1387	0.00152457	24.3	3.083	8.108	8.108	0	3.33333	16.4385	78.7107	15.625	0	0	16.67	0	0	0	317.52	1731.14	2.97084	0
1388	0.00810602	15.7	2.702	16.535	5.512	1.575	6.81818	9.71239	54.2807	7.692	0	0	0	0	45.16	0.16	351.431	1715.79	2.97337	0.75815
1389	0.00154024	11.7	2.571	16.667	11.111	0	6.28931	19.2533	45.4474	12.766	0	0	0	0	83.33	0	383.99	1720.55	2.92822	1.5163
1390	0.00249478	37.7	3.357	5.319	9.574	0	3.22581	11.4267	112.234	0	0	0	50	0	40	0	413.996	1707.69	2.92426	2.27445
1391	0.00569155	22.3	3.256	7.874	7.087	2.362	12.5	9.71239	61.4947	57.143	15.38	0	11.54	19.23	30.77	0.23	482.85	1628.74	2.93933	0
1392	0.00251554	21.5	3	3.704	9.259	1.852	5.04202	14.5369	67.58	38.235	45	0	0	0	25	0.4	572.418	1594.73	3.03975	0
1393	0.00154676	30.4	3.615	8.511	10.638	0	0	15.264	84.0465	12.5	0	0	0	0	0	0	524.149	1639.16	3.01559	0.379075
1394	0.00158781	19.5	3.875	3.226	22.581	0	14.8148	17.2342	50.3839	25	14.29	0	0	0	0	0.27	476.28	1683.91	2.97109	0
1395	0.00604105	20.7	3.289	5.6	8.8	0.8	11.1111	101.562	56.2816	9.091	0	0	6.67	6.67	50	0.07	349.633	1786.67	2.89966	4.92798
1396	0.00133961	20.9	3.111	32.143	3.571	0	4.54545	17.6616	67.1835	3.571	0	0	0	0	50	0.27	334.905	1766.81	2.92614	1.13723
1397	0.000684161	0	0	0	0	0	4.12371	0	0	13.187	0	0	0	0	100	0	258.443	1878.81	2.88653	0
1398	0.0353481	0	0	0	0	0	12.1951	0	0	8.333	0	0	0	0	0	0	112.26	2033.12	3.35796	0
1399	0.000750313	133.3	3.571	0	25	0	0	11.0714	373.177	0	0	0	0	0	0	0	654.585	3211.71	1.49686	0
1400	0.000143999	0	0	0	0	0	2.5	0	0	0	0	0	0	0	0	0	654.585	3211.71	1.49686	0
1401	0.000382132	0	0	0	0	0	0	0	0	0	0	0	0	0	0	0	647.811	3197.75	1.51407	0
1402	0.000480835	0	0	0	0	0	0	0	0	0	0	0	0	0	0	0	678.224	3217	1.51659	0
1403	0.000333179	0	0	0	0	0	0	0	0	0	0	0	0	0	0	0	675.431	3203.85	1.53333	0
1404	0.0139285	32.7	3.123	1.316	20.833	0	2.15517	3.8916	104.103	0	0	0	66.67	0	0	0	710.884	3211.9	1.54621	0.75815
1405	8.7326e-06	0	0	0	0	0	0	0	0	0	0	0	0	0	0	0	887.496	3281.77	1.52029	0
1406	0.000322215	0	0	0	0	0	3.53535	0	0	0.69	0	0	0	0	0	0	939.908	3369.68	1.52029	0
1407	0.000149278	0	0	0	0	0	0	0	0	0	0	0	0	0	0	0	1044.69	3471.91	1.42882	0
1408	0.000475188	0	0	0	0	0	0	0	0	0	0	0	0	0	0	0	1079.69	3506.05	1.42882	0
1409	0.000325311	0	0	0	0	0	0	0	0	0	0	0	0	0	0	0	1030.11	3536.65	1.35431	0
1410	0.000473181	0	0	0	0	0	0	0	0	0	0	0	0	0	0	0	958.496	3457.91	1.40333	0
1411	0.00030442	0	0	0	0	0	0	0	0	0	0	0	0	0	0	0	923.678	3412.79	1.45055	0
1412	0.00122572	0	0	0	0	0	0	0	0	0	0	0	0	0	0	0	890.332	3367.81	1.48947	0
1413	0.000314973	0	0	0	0	0	0	0	0	0	0	0	0	0	0	0	933.855	3379.95	1.50335	0
1414	0.00203446	0	0	0	0	0	12.4011	0	0	23.529	0	0	0	0	0	0	888.206	3379.21	1.47167	0
1415	0.0109734	32	3.311	0.57	19.658	0	0	4.81199	96.5971	0	0	0	100	0	0	0	852.736	3369.68	1.44861	1.13723
1416	0.000771946	0	0	0	0	0	3.61842	0	0	5.66	0	0	0	0	0	0	784.217	3315.96	1.47468	0
1417	0.000889256	0	0	0	0	0	0	0	0	0	0	0	0	0	0	0	788.225	3329.05	1.45609	0
1418	0.000294324	0	0	0	0	0	0	0	0	0	0	0	0	0	0	0	878.218	3435.42	1.35257	0
1419	0.00093145	0	0	0	0	0	0	0	0	0	0	0	0	0	0	0	1074.42	3606.51	1.25872	0
1420	1.47161e-05	0	0	0	0	0	0	0	0	0	0	0	0	0	0	0	1156.34	3719.87	1.07089	0
1421	0.000446765	0	0	0	0	0	0	0	0	0	0	0	0	0	0	0	1022.12	3590.23	1.21275	0
1422	0.00156715	0	0	0	0	0	0	0	0	0	0	0	0	0	0	0	931.829	3496.33	1.29407	0
1423	0.000152846	0	0	0	0	0	5.26316	0	0	0	0	0	0	0	0	0	752.228	3319.95	1.40884	0
1424	1.21414e-05	0	0	0	0	0	0	0	0	0	0	0	0	0	0	0	731.848	3302.82	1.37561	0
1425	0.00212472	0	0	0	0	0	0	0	0	0	0	0	0	0	0	0	778.572	3350.18	1.37561	0
1426	0.00219591	0	0	0	0	0	0	0	0	0	0	0	0	0	0	0	793.801	3365.75	1.35896	0
1427	0.000491361	0	0	0	0	0	0	0	0	0	0	0	0	0	0	0	943.254	3510.9	1.2843	0
1428	0.000286229	0	0	0	0	0	0	0	0	0	0	0	0	0	0	0	1048.9	3620.29	1.16715	0
1429	0.00257313	0	0	0	0	0	0	0	0	0	0	0	0	0	0	0	1143.18	3715.12	1.0709	0
1430	0.000887042	0	0	0	0	0	0	0	0	0	0	0	0	0	0	0	1063.81	3635.75	1.14362	0
1431	0.000154722	0	0	0	0	0	0	0	0	0	0	0	0	0	0	0	1004.71	3572.99	1.20149	0
1432	0.00074399	125	3.1	1.075	17.204	0	4.47761	11.4882	403.231	0	0	0	0	0	0	0	449.042	3017.49	1.60926	1.13723
1433	0.000385251	101.2	3.25	0	12.821	0	0	16.1893	311.485	0	0	0	0	0	0	0	476.28	3048.24	1.61839	0.75815
1434	0.000385251	83.1	3.556	0	37.5	0	0	17.0962	233.614	0	0	0	0	0	0	0	444.812	3016.44	1.6637	0
1435	0.000413726	79.8	3.3	3.03	21.212	0	3.84615	16.9605	241.706	0	0	0	0	0	0	0	428.946	3000.73	1.65515	0
1436	0.000719965	36.1	3.714	0	30.769	0	5.55556	17.9585	97.2269	0	0	0	0	0	0	0	444.812	3016.44	1.67315	0
1437	0.00065297	30.6	3.333	0	25	0	0	18.9124	91.8879	0	0	0	0	0	0	0	413.996	2984.73	1.70874	0
1438	0.000306925	0	0	0	0	0	0	0	0	0	0	0	0	0	0	0	462.861	3032.49	1.67095	0
1439	0.000306923	39.1	3	0	25	0	0	20.354	130.326	0	0	0	0	0	0	0	493.18	3064.11	1.62537	0
1440	3.51145e-05	0	0	0	0	0	0	0	0	0	0	0	0	0	0	0	781.803	3337.74	1.35896	0
1441	0.000214699	0	0	0	0	0	0	0	0	0	0	0	0	0	0	0	1034.99	3415.56	1.80929	0
1442	2.41841e-05	0	0	0	0	0	13	0	0	53.333	0	0	0	0	0	0	1055.49	3409.65	1.80929	0
1443	0.000360319	0	0	0	0	0	0	0	0	0	0	0	0	0	0	0	1065.59	3214.65	2.21903	0
1444	0.00548021	0	0	0	0	0	8.91089	0	0	0	0	0	0	0	0	0	809.521	2839.32	2.57825	0
1445	0.00106368	0	0	0	0	0	0	0	0	0	0	0	0	0	0	0	797.76	2763.07	2.61573	0
1446	3.6e-05	0	0	0	0	0	0	0	0	0	0	0	0	0	0	0	635.041	2645.39	2.61573	0
1447	0.000743991	56.5	3.5	0	21.429	0	1.28205	15.8295	161.292	0	0	0	0	0	0	0	396.9	2955.67	1.63155	0
1448	0.000465413	103.1	3.692	0	18.75	0	23.8095	15.1557	279.322	0	0	0	100	0	0	0	396.9	2955.67	1.63155	0
1449	0.000465412	45.1	3	0	23.81	0	3.48837	18.7465	150.404	6.667	0	0	0	0	0	0	362.029	2923.3	1.67547	1.13723
1450	0.00059972	160.1	3.2	1.042	17.708	0	0	11.3058	500.233	0	0	0	0	0	0	0	382.345	2953.32	1.69891	1.13723
1451	0.000399667	207.7	3.192	3.614	22.892	0	10	68.9726	650.542	0	0	0	0	0	0	0	415.515	2985.37	1.65422	0.379075
1452	0.00624392	73.5	3.558	1.089	25.054	0	3.65297	3.87044	204.999	0	0	0	0	0	0	0	206.998	2778.3	1.89294	1.89538
1453	0.00513003	47.8	3.403	0.408	26.531	0	4.5977	6.32126	140.35	1.124	0	0	12.5	0	0	0	112.26	2653.01	1.90048	0
1454	0.00440892	68.3	3.382	1.661	22.924	0	2.84238	5.42271	201.863	0	0	0	0	0	0	0	158.76	2670.99	1.85273	2.65353
1455	0.011243	46	3.447	0.774	25.532	0	2.77778	3.50241	133.417	0	0	0	0	0	0	0	251.022	2811.67	1.7894	6.0652
1456	0.00339497	71	3.493	1.245	26.141	0	3.33333	6.39697	197.351	1.818	0	0	10	0	0	0	238.14	2722.63	1.75309	3.79075
1457	0.00522193	64.5	3.37	0	20.475	0	14.8649	28.2267	189.585	31.818	0	0	100	0	0	0	511.986	2863.19	1.70299	3.0326
1458	0.00396534	69.6	3.45	0.362	24.275	0	2.67559	5.79015	196.704	1.01	0	0	0	0	0	0	590.835	2920.93	1.70942	0.379075
1459	0.00125842	155	3.305	1.026	27.179	0	1.1236	7.41886	468.841	3.125	0	0	0	0	0	0	689.282	2970.55	1.74485	2.27445
1460	0.000210703	0	0	0	0	0	0	0	0	0	0	0	0	0	0	0	767.979	3030.82	1.75579	0
1461	0.000149288	0	0	0	0	0	0	0	0	0	0	0	0	0	0	0	781.803	2980.3	1.78748	0
1462	3.9243e-06	0	0	0	0	0	0	0	0	0	0	0	0	0	0	0	754.737	2945.63	1.78748	0
1463	0.000614734	174.1	3.242	0.935	28.037	0	4.54545	10.6838	520.55	0	0	0	0	0	0	0	632.057	2901.88	1.73923	0
1464	0.000614735	170.8	3.281	0	25.714	0	2.08333	10.7918	520.549	5.556	0	0	0	0	0	0	582.241	2877.02	1.72503	3.41168
1465	0.000743458	78	3.222	0	29.31	0	2.40964	14.1517	242.112	0	0	0	0	0	0	0	554.525	2842.87	1.72439	1.5163
1466	0.000812412	112	3.37	0	17.582	0	0	11.6131	332.344	0	0	0	0	0	0	0	504.548	2818.83	1.70514	1.13723
1467	0.000436297	0	0	0	0	0	1.17647	0	0	0	0	0	100	0	0	0	327.292	2834.66	1.66586	0
1468	0.000482755	0	0	0	0	0	0	0	0	0	0	0	0	0	0	0	317.52	2775.58	1.68039	0
1469	0.00581443	46.4	3.506	0.37	25.185	0	6.46766	5.88586	130.709	4.918	0	0	0	0	0	0	191.173	2593.68	2.20186	1.13723
1470	0.00581469	61.9	3.429	0.833	26.389	0	2.5	4.71638	178.857	1.389	0	0	0	0	0	0	181.014	2624.35	2.15979	0.379075
1471	0.00665909	18.8	3.125	0.8	22.4	0	6.15385	9.80151	58.5665	0	0	0	16.67	0	0	0	146.37	2668.87	2.06599	1.5163
1472	0.00431151	50.6	3.254	2.752	18.349	0	3.33333	6.87012	155.398	2.985	0	0	0	0	0	0	150.613	2714.98	1.96979	1.13723
1473	0.00422536	42.8	3.291	0.552	26.519	0	0	7.79798	130.166	0	0	0	0	0	0	0	50.2044	2588.57	1.98955	1.13723
1474	0.000311101	0	0	0	0	0	0	0	0	0	0	0	0	0	0	0	35.4998	2587.84	2.06784	0
1475	0.00140765	0	0	0	0	0	15.3488	0	0	25.424	0	0	0	0	0	0	50.2044	2524.49	2.05165	0
1476	1.73763e-05	0	0	0	0	0	0	0	0	0	0	0	0	0	0	0	127.997	2462.06	2.05165	0
1477	0.00207617	0	0	0	0	0	0	0	0	0	0	0	0	0	0	0	146.37	2429.08	2.1565	0
1478	0.000797346	86.5	3.45	0	24.638	0	3.96476	13.1906	250.832	1.316	0	0	0	0	0	0	112.26	2493.34	2.16725	0.379075
1479	0.000656409	126.4	3.32	1.205	19.277	0	5.26316	12.1411	380.86	10	0	0	0	0	0	0	158.76	2479.15	2.22352	0.75815
1480	0.000193657	242.7	3.133	2.128	10.638	0	2.77778	15.264	671.289	0	0	0	0	0	0	0	177.499	2496.63	2.24257	1.5163
1481	8.52313e-05	0	0	0	0	0	0	0	0	0	0	0	0	0	0	0	158.76	2479.15	2.23726	0
1482	0.000582771	20.6	3	0	33.333	0	2.32558	20.354	68.6377	0	0	0	0	0	0	0	181.014	2430.9	2.23626	0
1483	0.00961262	6	2.762	1.724	27.586	0	0	14.1517	21.8463	0	13.33	0	6.67	0	0	0.23	561.302	2208.14	2.61122	1.13723
1484	0.00291119	24.4	2.731	1.408	7.042	1.408	0	13.0297	89.3104	0	0	0	0	0	0	0	473.627	2225.19	2.526	0.75815
1485	0.00341828	26.3	3.103	7.778	14.444	1.111	5.55556	66.3337	84.8381	4	0	0	0	0	30	0	508.28	2195.83	2.53426	1.13723
1486	0.00223378	18.4	2.733	9.756	9.756	0	5.26316	90.5975	67.1506	0	0	0	0	0	26.67	0	425.998	2197.84	2.41442	0
1487	0.00221357	36.1	2.963	5	16.25	0	0	12.3516	121.975	0	0	0	0	0	28.57	0	431.874	2235.36	2.46149	2.27445
1488	0.0018089	28.2	3.4	1.961	17.647	0	0	14.8398	82.9232	0	0	0	0	0	33.33	0	354.998	2258.92	2.36321	0.75815
1489	0.000870833	16.1	2.8	0	21.429	0	2.96053	19.9734	57.4163	1.923	0	0	25	0	0	0	356.769	2241.27	2.32434	0
1490	0.00132458	0	0	0	0	0	4.70588	0	0	0	0	0	0	0	0	0	270.359	2302.02	2.19541	0
1491	0.000541957	215.9	3.343	0	23.932	0	0	10.175	645.807	0	0	0	0	0	0	0	224.521	2349.7	2.19411	1.89538
1492	0.00104984	0	0	0	0	0	0	0	0	0	0	0	0	0	0	0	181.014	2430.9	2.23726	0
1493	1.19932e-05	0	0	0	0	0	0	0	0	0	0	0	0	0	0	0	215.937	2399.85	2.30068	0
1494	0.00466044	65.4	3.081	0	23.279	0	3.33333	5.36821	212.426	0	0	0	100	0	0	0	238.14	2435.3	2.30068	1.89538
1495	0.00659521	39.3	3.278	3.475	24.71	0	5.45455	6.06982	118.268	0	0	0	0	2.38	26.19	0	404.761	2284.44	2.45911	4.5489
1496	0.00396725	5	3.333	0	10	0	2.91262	18.9124	15.1238	2.857	0	0	0	0	0	0	382.345	2333.56	2.45435	3.41168
1497	0.00151445	0	0	0	0	0	0	0	0	0	0	0	0	0	0	0	511.986	2357.2	2.55648	0
1498	0.0109757	47.6	3.242	0.766	22.414	0	8.86076	3.47393	146.687	0	0	0	0	0	0	0	277.263	2521.24	2.31232	0.75815
1499	0.000523478	0	0	0	0	0	3.57143	0	0	0	0	0	0	0	0	0	413.996	2570.98	2.37833	0
1500	0.00757118	25.4	3.368	3.125	17.708	1.042	0	7.49696	75.2855	0	34.43	0	0	0	0	0.21	762.214	2211.27	2.60789	0.75815
1501	0.00410274	26.6	4.037	1.835	26.606	5.505	14.6853	109.608	65.8097	45.946	61.22	0	0	0	40.82	0.29	738.704	2311.58	2.64756	2.65353
1502	0.00222686	38.2	3.4	1.176	23.529	7.059	4.92424	12.0046	112.265	0	27.78	0	0	0	22.22	0.14	728.396	2411.9	2.61298	1.5163
1503	0.00786509	21.2	3.63	1.198	22.754	0.599	11.9565	46.6856	58.4863	3.704	42.47	1.37	0	0	27.4	0.29	704.652	2488.28	2.57503	2.27445
1504	0.00240463	13.7	3.3	3.03	18.182	0	0	16.9605	41.5865	0	33.33	0	0	0	0	0.24	738.704	2562.39	2.61539	2.27445
1505	9.75807e-05	0	0	0	0	0	7.43243	0	0	0	100	0	0	0	0	0	767.979	2586.62	2.6331	0
1506	0.000497286	0	0	0	0	0	11.1111	0	0	0	0	0	0	0	0	0	748.87	2612.56	2.6331	0
1507	0.0019876	28.2	3.733	3.571	19.643	0	3.22581	14.3417	75.468	0	0	0	0	0	77.78	0	639.983	2568.29	2.55027	0.75815
1508	0.00316912	37.2	3.576	2.542	24.576	0.847	5.45455	10.1267	104.13	0	0	0	0	0	0	0	632.057	2518.24	2.53406	1.89538
1509	0.0022376	32.6	3.318	2.74	20.548	1.37	0	12.8726	98.3196	0	0	0	0	0	100	0	654.585	2491.32	2.53254	2.65353
1510	0.00193917	21.7	3.231	2.381	11.905	2.381	8.91089	15.8295	67.0389	0	0	0	0	0	100	0	577.896	2472.79	2.5133	2.65353
1511	0.00228366	39.4	3.6	2.222	22.222	0	4.34783	11.6765	109.473	0	0	0	7.14	0	0	0	577.896	2422.85	2.54696	1.13723
1512	0.00222202	27.9	3.1	1.613	19.355	0	7.89474	13.7864	90.0082	0	0	0	0	0	0	0	652.657	2441.24	2.55043	1.89538
1513	0.0016694	38.3	3.2	0	18.75	0	7.89474	13.6107	119.804	0	0	0	0	0	0	0	654.585	2391.17	2.57333	3.41168
1514	0.00156174	43.5	2.957	2.941	23.529	0	8.51064	13.2725	147.271	0	0	0	0	0	0	0	660.335	2341.11	2.57976	0.75815
1515	0.00122273	0	0	0	0	0	11.1111	0	0	7.692	100	0	0	0	0	0	620.994	2295.44	2.61142	0
1516	0.00111152	13.5	3.75	0	13.333	0	10.6667	19.7884	35.9868	0	68.75	0	0	0	0	0.28	689.282	2314.31	2.60063	1.89538
1517	0.00372479	11.3	3.5	4.762	23.81	9.524	7.27273	15.8295	32.2165	0	16.67	0	0	0	11.11	0	682.853	2240.99	2.60337	1.89538
1518	0.00221079	29.4	3.421	1.538	15.385	1.538	32.4324	76.8323	85.942	25	0	0	0	0	0	0	699.266	2190.95	2.61125	1.13723
1519	0.00418536	26.5	3.364	5.405	19.82	2.703	11.3636	10.4743	78.8463	0	0	7.69	0	7.69	0	0	685.616	2168.11	2.61132	3.41168
1520	0.00793239	25.3	3.407	3.98	17.413	1.493	11.7117	7.26743	74.3786	4.762	16.28	0	0	0	4.65	0.09	925.723	1746.72	2.56585	1.5163
1521	0.00805845	29.4	3.591	3.797	17.722	1.688	10.5556	6.47452	81.9016	0	0	0	0	0	8.11	0	852.736	1824.71	2.5407	0.75815
1522	0.0065203	35.1	3.694	1.31	19.651	0	0	37.6953	93.554	0	0	0	3.57	0	0	0	816.496	1874.45	2.53686	2.27445
1523	0.0043841	32.4	3.463	1.408	21.127	2.817	9.48276	9.09234	88.9577	0	0	0	4.55	0	0	0	745.497	1931.4	2.52252	0.379075
1524	0.00311314	40.8	3.528	3.937	15.748	2.362	5.6872	9.71239	115.639	1.515	0	0	15.38	0	0	0	710.884	1981.01	2.51053	1.89538
1525	0.00333286	19.5	3.421	0	24.615	3.077	12.766	13.5246	57.0082	6.667	0	0	0	0	0	0	731.848	2068.15	2.56618	1.13723
1526	0.00143287	31.4	3.462	2.222	8.889	0	13.5514	15.4853	90.7269	0	0	0	0	11.11	11.11	0	697.461	2095.69	2.57931	0
1527	0.00225145	48.4	3.516	5.505	18.349	2.752	16.6667	10.578	133.247	0	0	0	0	0	28.57	0	752.228	2113.96	2.57502	1.13723
1528	0.00289511	21.8	3.15	4.762	15.873	0	17.8571	141.937	69.082	15.789	56.25	0	0	0	81.25	0	831.03	2084.84	2.57499	1.89538
1529	0.00189673	39	3.7	1.351	24.324	4.054	7.14286	12.7955	105.445	0	0	0	0	8.33	16.67	0	819.578	2060.83	2.55551	1.89538
1530	0.0024199	19.8	3.2	2.083	18.75	2.083	12.5	86.0984	61.9861	20	22.22	5.56	0	5.56	38.89	0	853.474	2034.67	2.5319	0
1531	0.0011843	0	0	0	0	0	19.7674	0	0	6.897	66.67	0	0	66.67	0	0	898.083	2033.43	2.55122	0
1532	0.00158921	8.8	3.5	14.286	14.286	14.286	22.807	206.961	25.1697	15	12.5	0	0	25	12.5	0.27	878.218	1984.5	2.5419	0.379075
1533	0.00376732	27.3	3.552	5.825	23.301	4.854	9.7561	10.9019	76.9778	13.333	4.35	0	0	0	26.09	0	800.913	2013.81	2.53009	1.5163
1534	0.00168879	13.6	3.286	4.348	13.043	0	23.0769	104.661	41.4499	25	64.29	0	0	7.14	7.14	0.28	905.072	1934.33	2.56964	1.89538
1535	0.00060065	0	0	0	0	0	9.09091	0	0	0	0	0	0	0	0	0	939.908	1908.43	2.59101	0
1536	0.00262291	33.9	3.179	3.371	12.36	2.247	9.21053	66.6982	106.752	8.333	0	8.33	0	0	0	0	852.736	1585.22	2.64268	0.75815
1537	0.00239376	43.4	3.586	6.731	13.462	0	7.01754	10.8466	121.148	0	0	0	0	0	33.33	0	816.496	1595.52	2.63795	0.75815
1538	0.00304784	38.1	3.314	0.862	18.103	0	4.15704	10.2237	114.835	3.974	0	0	0	0	0	0	817.268	1625.65	2.5859	0
1539	0.00217959	29.4	3.368	3.125	18.75	1.563	6.25	13.6107	87.1724	0	0	0	0	0	20	0	887.496	1634.54	2.60141	0.75815
1540	0.00214455	17.3	3.083	0	18.919	0	17.8808	16.4385	55.9557	27.907	0	0	0	0	0	0	923.678	1683.91	2.55886	1.5163
1541	0.00338744	27.5	3.207	5.376	16.129	0	16.6667	11.4882	85.6103	23.81	0	0	0	0	0	0	854.95	1674.52	2.57431	0.379075
1542	0.00420028	29.3	2.929	2.439	17.073	0	7.48299	56.1974	99.9934	2.083	0	0	0	0	0	0	835.567	1772.51	2.54561	5.68613
1543	0.00448252	37.9	3.542	4.706	20	0	7.69231	8.12418	107.083	2.128	0	0	0	0	0	0	800.913	1802.47	2.56905	0.379075
1544	0.00477684	31.6	3.213	3.311	20.53	1.987	2.38095	49.7475	98.3914	0	0	0	4.35	0	0	0	724.058	1881.49	2.55729	2.65353
1545	0.00553964	36.3	3.242	2.985	19.9	0.498	0	7.26743	111.921	0	0	0	0	0	11.11	0.08	682.853	1930.42	2.70271	0.75815
1546	0.00288869	47.4	3.425	0	18.248	3.65	5.40541	9.29004	138.471	0	0	0	0	0	0	0	639.983	1998.74	2.4854	0
1547	0.00161562	27.2	3.385	4.545	22.727	2.273	8.69565	15.5983	80.4642	0	0	0	0	0	0	0	612.822	1990.84	2.47295	0.379075
1548	0.000885149	0	0	0	0	0	0	0	0	0	0	0	0	0	0	0	585.478	2003.46	2.43675	0
1549	6.39998e-05	0	0	0	0	0	6.93642	0	0	5.263	0	0	0	0	0	0	585.478	2003.46	2.42889	0
1550	0.00474295	20	3.393	1.053	15.789	1.053	0	11.3659	56.9265	0	0	0	8.33	0	0	0	543.043	2051.94	2.41449	0.75815
1551	0.00282458	26.9	3.304	2.632	11.842	0	14.7959	12.6441	81.4281	4.444	0	0	0	0	0	0	502.044	2100.5	2.37902	3.0326
1552	0.00325108	0	0	0	0	0	22.449	0	0	3.03	0	0	0	0	0	0	604.541	2028.47	2.56294	0
1553	0.00589261	35.8	3.246	2.844	23.697	2.844	4.54545	7.02834	83.155	1.613	53.49	44.19	0	27.91	44.19	0	947.254	1486.34	2.65214	5.30705
1554	0.0029069	31	2.903	10	18.889	1.111	11.8644	11.6765	82.562	11.111	52	36	0	44	100	0.24	1067.95	1506.13	2.72379	2.65353
1555	0.00224254	37.9	3.4	2.353	21.176	1.176	19.2771	12.0046	93.644	20.833	75	16.67	0	12.5	100	0.23	1059.06	1531.44	2.70999	4.16983
1556	0.00398967	19.3	3.348	3.896	19.481	0	14.4737	12.5697	45.1165	19.048	59.09	22.73	4.55	9.09	90.91	0.37	1079.69	1607.32	2.78081	0.379075
1557	1.50012e-05	0	0	0	0	0	7.2	0	0	5.128	0	0	0	0	0	0	1114.72	1631.83	2.78081	0
1558	0.00826407	26.7	3.348	6.335	17.647	0	19.403	38.6558	54.4526	2.941	22.22	0	0	1.85	3.7	0.27	996.528	1691	2.61008	5.30705
1559	0.00538697	27.7	3.386	2.685	16.107	2.013	14.7887	91.488	63.1152	12.195	0	0	0	0	42.86	0	996.528	1641.08	2.60086	1.5163
1560	0.0034248	49.6	3.469	2.353	18.235	1.765	11.6438	46.153	128.475	29.268	70	66.67	0	30	93.33	0	964.394	1591.17	2.60576	2.65353
1561	0.00336554	48.4	3.543	2.454	23.926	2.454	7.8125	8.34637	121.823	5.556	64.52	83.87	0	35.48	87.1	0	968.957	1563.61	2.61802	0
1562	0.00427749	37.9	3.682	3.086	16.667	1.235	8.18182	8.3791	95.8506	0	62.86	82.86	0	25.71	31.43	0.06	939.908	1513.64	2.63275	1.5163
1563	0.00914502	41.3	3.098	6.349	19.312	1.323	13.7143	4.53612	111.536	22.449	76.09	69.57	1.09	47.83	94.57	0.1	909.932	1359.23	2.71074	6.0652
1564	0.00125893	50.8	3.048	4.688	17.188	1.563	9.375	13.6107	142.979	0	60	20	0	10	80	0	999.685	1456.79	2.70852	3.0326
1565	0.00120189	58.2	3.5	2.857	24.286	0	21.0938	13.1096	158.084	25	86.67	33.33	0	33.33	100	0	965.7	1432.8	2.68778	0.379075
1566	0.00528433	29.5	3.9	3.846	17.308	2.564	3.22581	8.58104	70.0183	31.579	64.71	85.29	0	41.18	97.06	0.2	1010.34	1431.04	2.80652	2.65353
1567	0.00533823	26.4	3.205	7.092	15.603	2.128	16.9082	9.13121	67.4381	30.435	51.28	53.85	0	33.33	100	0.27	988.911	1380.85	2.73065	2.65353
1568	0.00716119	33.2	3.449	6.723	21.849	0.84	18.0851	66.8855	64.2351	33.333	47.92	54.17	0	18.75	83.33	0.24	984.441	1305.31	2.80658	1.5163
1569	0.00439531	35	3.348	2.597	20.13	0	17.2414	8.65054	68.2545	22.222	62.5	6.25	0	3.13	15.63	0	852.736	1132.11	2.93864	1.13723
1570	0.00203498	57.5	3.25	4.274	22.222	0	6.52174	10.175	127.765	0	73.33	0	0	0	13.33	0	876.782	1182.2	2.9068	1.13723
1571	0.010047	17.4	3.365	4.571	23.429	0	0	45.2918	35.8318	0	37.5	46.88	0	31.25	37.5	0.27	907.158	1205.95	2.90833	3.0326
1572	0.00584982	39	3.353	5.702	15.789	0.877	0	6.65607	100.858	0	30.3	33.33	0	24.24	39.39	0	730.987	1201.24	2.76259	1.89538
1573	0.00642198	32.2	3.569	4.831	15.459	1.449	14.1844	7.12206	84.0862	32.5	59.09	56.82	0	45.45	95.45	0.09	714.421	1230.78	2.71824	2.27445
1574	0.0070406	35.1	3.529	5.668	20.648	2.024	0	6.28407	83.7997	0	50.94	67.92	0	33.96	60.38	0.07	731.848	1279.97	2.68924	3.79075
1575	0.0026925	57.6	3.298	5.161	21.29	1.935	8.08081	8.61565	148.561	9.091	89.47	42.11	0	28.95	100	0.05	857.893	1286.35	2.75643	1.89538
1576	0.00451862	38.1	3.51	4.651	18.023	2.326	7.29167	8.06286	95.1617	3.448	73.47	59.18	0	40.82	93.88	0	864.478	1363.86	2.67987	1.89538
1577	0.0319557	5	3.614	6.289	14.465	0	4.87805	8.47887	13.1432	3.571	5.88	35.29	2.94	20.59	94.12	0.14	766.336	1407.96	2.67271	1.89538
1578	0.00314796	39.4	3.543	4.032	16.935	0.806	20.1201	55.9384	111.183	46.078	0	0	7.14	0	0	0	858.627	1526.91	2.64632	0.379075
1579	0.00259847	34.3	3.423	2.247	20.225	0	16.3399	11.7407	92.3621	13.636	0	0	7.14	0	0	0.13	781.803	1546.59	2.64156	1.13723
1580	0.116493	0	0	0	0	0	0	0	0	0	0	0	0	0	0	0	1063.81	2791.88	2.57671	0
1581	0.0203434	0	0	0	0	0	0	0	0	0	0	0	0	0	0	0	1172.03	2655.85	3.62964	0
1582	0.0373526	0	0	0	0	0	0	0	0	0	0	0	0	0	0	0	1232.31	2542.15	3.66944	0
1583	0.0422378	0	0	0	0	0	17.3554	0	0	35	0	0	0	0	0	0	1306.28	2431.93	3.60467	0
1584	0.0158223	0	0	0	0	0	9.21053	0	0	22.727	0	0	0	0	0	0	1313.49	2374.51	3.59531	0
1585	0.0157731	0	0	0	0	0	0	0	0	0	0	0	0	0	0	0	1206.99	2320.56	3.58858	0
1586	2.2298e-05	0	0	0	0	0	9.92366	0	0	6.977	0	0	0	0	0	0	1180.07	2179.7	3.67613	0
1587	0.00119299	0	0	0	0	0	0	0	0	0	0	0	0	0	0	0	1215.32	2197.84	3.67613	0
1588	0.0101015	0	0	0	0	0	0	0	0	0	0	0	0	0	0	0	1290.75	2175.94	3.73025	4.16983
1589	0.00197384	0	0	0	0	0	0	0	0	0	0	0	0	0	0	0	1151.97	2229.44	3.70849	0
1590	0.00411222	0	0	0	0	0	15.7895	0	0	14.286	0	0	0	0	0	0	1114.72	2300.93	3.70077	0
1591	0.00454344	0	0	0	0	0	22.2222	0	0	10	0	0	0	0	0	0	1059.06	2345.41	3.70958	0
1592	0.00570271	0	0	0	0	0	0	0	0	0	0	0	0	0	0	0	1055.49	2395.39	3.69353	0
1593	0.00393601	0	0	0	0	0	0	0	0	0	0	0	0	0	0	0	1004.09	2441.24	3.64861	0
1594	0.0184533	0	0	0	0	0	0	0	0	0	0	0	0	0	0	0	931.829	2512.23	3.62693	0
1595	0.0016503	0	0	0	0	0	0	0	0	0	0	0	0	0	0	0	931.829	2361.74	3.66048	0
1596	0.000272555	0	0	0	0	0	0	0	0	0	0	0	0	0	0	0	909.24	2335.72	3.67776	0
1597	0.000111488	0	0	0	0	0	0	0	0	0	0	0	0	0	0	0	945.256	2261.43	2.67388	0
1598	0.00232933	0	0	0	0	0	0	0	0	0	0	0	0	0	0	0	986.998	2314.31	3.70953	0
1599	0.00357304	0	0	0	0	0	0	0	0	0	0	0	0	0	0	0	1023.97	2240.99	3.69644	0
1600	0.00207165	0	0	0	0	0	0	0	0	0	0	0	0	0	0	0	1034.99	2190.95	3.68293	0
1601	0.000247483	0	0	0	0	0	0	0	0	0	0	0	0	0	0	0	952.561	2135.01	2.62378	0
1602	0.00025047	0	0	0	0	0	0	0	0	0	0	0	0	0	0	0	937.223	2109.18	2.60965	0
1603	0.000168047	0	0	0	0	0	0	0	0	0	0	0	0	0	0	0	937.223	2109.18	2.60965	0.379075
1604	0.000545105	0	0	0	0	0	0	0	0	0	0	0	0	0	0	0	955.863	2058.99	2.61197	0
1605	0.00051463	0	0	0	0	0	0	0	0	0	0	0	0	0	0	0	969.607	2084.84	2.63086	0
1606	5.0384e-05	0	0	0	0	0	0	0	0	0	0	0	0	0	0	0	984.441	2110.97	2.63085	0
1607	0.00026417	0	0	0	0	0	12.0805	0	0	5.102	0	0	0	0	0	0	988.911	2034.67	2.62969	0
1608	0.000243753	0	0	0	0	0	0	0	0	0	0	0	0	0	0	0	976.73	2008.8	2.61725	0
1609	0.000106295	0	0	0	0	0	12.4514	0	0	57.746	0	0	0	0	0	0	1016.56	1882.83	2.60509	0
1610	5.16543e-05	0	0	0	0	0	0	0	0	0	0	0	0	0	0	0	1086.09	1834.01	2.60509	0
1611	5.16548e-05	0	0	0	0	0	0	0	0	0	0	0	0	0	0	0	1162.86	1813.62	2.64559	0
1612	0.0108915	0	0	0	0	0	0	0	0	0	0	0	0	0	0	0	1156.34	1918.31	3.70449	0
1613	0.0203394	0	0	0	0	0	0	0	0	0	0	0	0	0	0	0	1143.18	2073.63	3.75756	0
1614	0.0134747	0	0	0	0	0	10.2564	0	0	55.556	0	0	0	0	0	0	1224.1	2137.67	3.71267	0
1615	0.0010393	0	0	0	0	0	0	0	0	0	0	0	0	0	0	0	1239.96	2077.58	3.68552	0
1616	2.31499e-06	0	0	0	0	0	0	0	0	0	0	0	0	0	0	0	1143.18	1802.47	2.77503	0
1617	0.000916199	0	0	0	0	0	0	0	0	62.5	0	0	0	0	0	0	929.12	2097.8	2.73487	0
1618	0.00477712	0	0	0	0	0	8	0	0	57.143	0	0	0	0	0	0	1102.78	2207.28	3.6318	0
1619	0.000265353	0	0	0	0	0	0	0	0	0	0	0	0	0	0	0	1101.07	2238.74	3.61473	0
1620	0.0165192	0	0	0	0	0	18.4	0	0	30.233	0	0	0	0	0	0	994.629	2191.81	3.67078	0
1621	0.01348	3	4.1	0	21.951	4.878	25	15.9476	7.41837	9.091	0	0	0	0	0	0	781.803	2177.97	2.70991	1.13723
1622	0.00204067	36.8	3.947	0	26.667	2.667	0	131.796	93.1066	0	89.47	31.58	0	36.84	68.42	0.24	781.803	2110.97	2.71066	0.379075
1623	0.00273542	39.5	3.484	0.926	25	0.926	5.97015	60.3921	113.328	10.526	89.47	26.32	0	23.68	0	0	745.497	2132.95	2.72628	0
1624	0.00392412	19.9	3.25	0	24.359	0	0	129.483	61.1603	0	56.25	12.5	0	12.5	18.75	0.18	709.997	2121.99	2.73447	2.65353
1625	0.00487609	16.6	3.115	2.469	14.815	0	14.2857	12.2806	51.2706	0	30.77	15.38	0	15.38	34.62	0.08	638.997	2101.7	2.73108	0
1626	0.00109453	14.6	4	0	43.75	0	0	19.6067	36.5453	0	50	16.67	0	16.67	50	0.21	639.983	2135.9	2.73322	0
1627	0.000691888	21.7	3	0	20	0	9.67742	112.416	72.266	6.452	0	0	0	0	100	0	713.538	2189.8	2.71315	0
1628	0.0168025	3.9	3.474	3.03	13.636	3.03	0	202.168	11.3078	0	75	7.14	0	10.71	60.71	0.07	654.585	2238.74	2.90166	2.27445
1629	8.84458e-05	0	0	0	0	0	0	0	0	0	0	0	0	0	0	0	731.848	2385.1	2.90166	0
1630	0.00906269	4.4	3.636	0	17.5	5	6.66667	16.0676	12.1377	15.789	0	0	0	0	0	0	741.259	2325.99	2.66446	5.68613
1631	0.00636804	0	0	0	0	0	0	0	0	0	0	0	0	0	0	0	968.957	2604.83	3.51321	0
1632	0.0301536	0	0	0	0	0	12.4668	0	0	31.008	0	0	0	0	0	0	1506.97	2782.83	3.36304	0
1633	0.0168563	0	0	0	0	0	9.85915	0	0	16.667	0	0	0	0	0	0	955.863	2514.73	3.56655	0
1634	0.0253442	0	0	0	0	0	54.5455	0	0	66.667	0	0	0	0	0	0	947.254	2393.28	3.60173	0
1635	0.0260275	0	0	0	0	0	0	0	0	0	0	0	0	0	0	0	964.394	2307.49	3.6709	0
1636	0.0257339	0	0	0	0	0	0	0	0	0	0	0	0	0	0	0	1219.98	2476.86	3.48275	0
1637	0.0254826	0	0	0	0	0	2.12766	0	0	5.714	0	0	0	0	0	0	1214.28	2588.57	3.41277	0
1638	0.0257162	0	0	0	0	0	0	0	0	0	0	0	0	0	0	0	1193.34	2689.8	3.38864	0
1639	0.0100534	12.9	3.514	4.615	14.615	2.308	0	9.58171	35.8087	0	37.93	58.62	0	50	98.28	0.12	258.443	2102	3.05829	4.92798
1640	0.00448193	5.6	3.125	16	8	0	14.0351	18.1108	17.8494	0	55.56	70.37	0	70.37	51.85	0.26	146.37	2060.21	3.05052	0
1641	0.00278755	13.6	2.923	2.632	15.789	0	12	92.6729	43.0486	12.5	30.77	23.08	0	30.77	100	0	227.31	2168.11	2.99168	1.89538
1642	0.00136693	22.7	3.444	6.452	29.032	0	13.8889	97.9062	58.5251	25	80	6.67	0	33.33	100	0	251.022	2203.57	2.95605	1.5163
1643	0.00434551	14.3	3.444	3.226	16.129	0	14.2857	78.3197	41.4221	10	44.83	48.28	0	48.28	100	0	327.292	2243.52	2.88397	1.5163
1644	0.01393	16	3.484	1.794	17.937	3.587	6.84932	6.76141	45.944	25	60	32.22	0	30	86.67	0.03	349.633	2179.7	2.95483	2.65353
1645	0.00150931	14.6	3.143	0	13.636	0	17.9487	18.5834	39.7533	11.111	83.33	58.33	0	41.67	66.67	0.28	439.109	2159.37	2.86229	1.5163
1646	0.00150915	15.2	3.833	0	26.087	0	0	18.4232	39.7574	0	63.64	27.27	0	27.27	72.73	0.25	473.627	2165.49	2.81696	0
1647	0.000580996	0	0	0	0	0	9.67742	0	0	25	33.33	0	0	0	100	0	516.886	2206.99	2.75692	0
1648	0.00280245	9.6	3.375	0	18.519	11.111	0	17.8088	28.5464	0	0	16.67	0	16.67	0	0	494.456	2235.36	2.78432	0.379075
1649	0.00174913	25.7	3.214	4.444	22.222	0	0	15.4853	80.0399	0	69.23	7.69	0	7.69	76.92	0	540.718	2276.7	2.71285	0.379075
1650	0.000148479	67.3	2	10	10	0	13.4328	20.7493	336.747	66.667	0	0	0	0	0	0	587.627	2318.39	2.6885	1.13723
1651	8.38733e-05	0	0	0	0	0	6.52174	0	0	16.667	100	0	0	0	0	0	603.497	2353.19	2.68862	0
1652	0.00238155	0	0	0	0	0	13.8889	0	0	38.462	100	0	0	0	0	0	555.661	2311.58	2.68862	0
1653	7.06927e-05	0	0	0	0	0	16.6667	0	0	0	0	0	0	0	0	0	572.418	2346.48	2.68862	0
1654	9.93876e-05	140.9	3.5	7.143	14.286	0	14.4737	19.9734	402.465	4	0	0	0	0	0	0	541.882	2340.3	2.68166	0.379075
1655	0.00402729	15.9	3.048	3.125	17.188	0	0	77.3218	52.1442	0	71.43	3.57	0	3.57	96.43	0	511.986	2334.64	2.70048	4.16983
1656	0.00251596	12.7	2.909	3.125	12.5	0	9.85915	17.0962	43.7208	8.696	10	50	0	40	60	0	476.28	2264.49	2.76025	0
1657	0.000106517	0	0	0	0	0	30	0	0	0	0	0	0	0	0	0	413.996	2254.45	2.82783	0
1658	0.00447471	22.1	3.414	2.02	17.172	3.03	4.7619	11.1291	62.5739	16.667	79.07	20.93	0	32.56	48.84	0	413.996	2254.45	2.8376	1.13723
1659	0.00454983	31.9	3.372	2.069	22.069	0.69	7.69231	8.97771	94.5091	0	76.74	23.26	0	25.58	83.72	0	427.475	2320.83	2.78181	1.89538
1660	0.00708898	8.5	3	5	15	0	12.5	13.9667	28.2128	0	30.77	15.38	0	15.38	96.15	0	377.369	2314.31	2.83667	1.13723
1661	0.00365987	4.4	3.2	6.25	25	6.25	19.3548	19.6067	13.6617	0	0	0	0	0	0	0	428.946	2416.34	2.85056	0
1662	0.00455712	0	0	0	0	0	7.31707	0	0	6.667	45.45	18.18	0	18.18	27.27	0	413.996	2382.72	2.82564	0
1663	0.00335637	20.3	2.957	2.941	17.647	0	14.0351	13.2725	68.5264	4.762	68.97	34.48	0	34.48	51.72	0	477.602	2360.14	2.7052	1.5163
1664	0.000891804	40.4	3.273	2.778	22.222	0	8.88889	16.566	123.346	10.714	100	0	0	0	18.75	0	504.548	2364.67	2.67789	1.13723
1665	6.47515e-05	0	0	0	0	0	26.3158	0	0	54.545	100	0	0	0	0	0	554.525	2404.84	2.67789	0
1666	7.27776e-06	0	0	0	0	0	9.52381	0	0	5.714	0	0	0	0	0	0	554.525	2404.84	2.67789	0
1667	0.00803903	9.8	3.292	5.063	15.19	2.532	13.4454	70.577	29.8543	36.111	48.28	48.28	0	34.48	75.86	0	404.761	1943.43	2.9669	2.65353
1668	0.00289974	6.9	2.857	5	15	0	0	195.968	24.1401	0	0	60	0	60	100	0	473.627	1956.36	2.89128	2.65353
1669	0.00148769	0	0	0	0	0	0	0	0	0	0	20	0	20	80	0	508.28	1963.75	2.84847	0
1670	0.00105845	0	0	0	0	0	6.66667	0	0	0	50	50	0	0	0	0	561.302	1902.81	2.80549	0
1671	0.00289173	6.9	3.333	0	25	0	0	18.9124	20.7488	0	36.36	0	0	0	27.27	0	461.498	1879.82	2.9267	0
1672	0.00609646	4.1	3.125	0	16	0	0	102.886	13.1224	0	42.86	0	0	0	0	0	413.996	1832.63	2.96977	0.75815
1673	0.00146873	19.1	3.5	0	21.429	0	0	17.6616	54.4689	0	84.62	0	0	0	0	0	383.99	1827.47	3.02039	0
1674	0.00673328	14.9	3.333	2	13	0	0	11.0714	44.5548	0	19.35	22.58	0	12.9	48.39	0.07	327.292	1819.17	3.05886	1.13723
1675	0.00278411	0	0	0	0	0	2.94118	0	0	80	11.11	11.11	0	22.22	77.78	0.15	462.861	1642.61	3.00749	0
1676	0.00123862	17	2.625	9.524	14.286	0	3.57143	18.7465	64.588	7.407	0	25	0	25	0	0	541.882	1576.45	3.00541	2.65353
1677	0.00718675	13.5	3.593	3.093	18.557	0	0	11.2463	37.5691	0	10.71	14.29	0	14.29	0	0.13	700.166	1448.12	3.04156	0.75815
1678	0.00164388	0	0	0	0	0	13.0435	0	0	12.5	0	0	0	0	0	0	767.979	1429.28	3.02521	0.379075
1679	0.000471956	0	0	0	0	0	0	0	0	0	0	0	0	0	0	0	878.935	1483.37	2.97228	0
1680	0.00403811	8.4	3.091	5.882	20.588	5.882	16.129	16.8269	27.2405	0	40	0	0	0	100	0.25	652.657	1853.15	2.77951	0.75815
1681	0.0295059	4.1	3	12.5	11.667	0	9.23077	10.0316	13.5566	42.105	51.61	16.13	0	25.81	12.9	0	654.585	1965.36	2.7484	3.41168
1682	0.0242521	4.1	2.632	4	18	6	15.6028	62.896	15.2564	40	53.85	33.33	0	35.9	79.49	0.16	496.998	2067.85	3.07435	0.379075
1683	0.0018086	18.8	2.833	2.941	14.706	0	0	16.8269	66.3497	0	25	0	0	0	50	0	537.21	2144.73	2.76314	0.379075
1684	0.00464923	15.7	3.042	5.479	5.479	2.74	13.7255	12.8726	49.4706	0	27.27	13.64	0	9.09	72.73	0.09	466.928	2130.58	2.84225	0.379075
1685	0.00860583	10.6	3.033	6.593	13.187	1.099	17.9487	11.6131	34.8601	15.385	21.21	27.27	0	12.12	90.91	0.07	321.465	2003.46	3.06895	2.65353
1686	0.00159099	10.7	3.4	0	11.765	0	5.76923	19.4284	31.4269	0	25	25	0	37.5	75	0.21	212.999	2028.47	3.06827	0.379075
1687	0.000336745	0	0	0	0	0	0	0	0	0	100	50	0	70	40	0	177.499	2026.29	3.08697	0
1688	0.00305733	4.9	2.5	20	13.333	0	13.7931	112.416	19.625	42.857	54.55	36.36	0	36.36	72.73	0.29	146.37	1989.26	3.08981	0
1689	0.00215376	0	0	0	0	0	8.69565	0	0	16.216	25	75	0	75	75	0.29	224.521	1957.65	3.12302	0
1690	5.53837e-05	0	0	0	0	0	0	0	0	0	100	100	0	100	100	0	227.31	1884.5	3.07881	0
1691	0.00356014	11.2	2.857	7.5	10	5	19.1176	16.0676	36.5154	8.333	12.5	25	0	25	87.5	0	277.263	1851.45	3.07881	1.5163
1692	0.00101556	0	0	0	0	0	0	0	0	0	33.33	66.67	0	33.33	100	0.19	238.14	1922.24	3.0838	0
1693	0.00741168	10.3	3.167	5.263	14.474	1.316	21.4286	12.6441	32.3813	16.667	33.33	53.33	0	56.67	86.67	0.11	303.311	1928.79	3.06824	1.13723
1694	0.00483878	12.8	3.1	12.903	11.29	0	10.7143	13.7864	41.3327	40	38.46	69.23	0	61.54	34.62	0.2	1096.48	1286.35	2.86486	1.5163
1695	0.00364177	35.4	3.486	5.426	16.279	3.876	22.4138	9.62488	101.599	100	66.67	46.67	0	0	100	0.11	1101.07	1264.11	2.88805	3.0326
1696	0.00082661	64.1	3.786	1.887	18.868	0	0	14.6365	169.367	0	77.78	44.44	0	0	88.89	0	1176.33	1279.97	2.89599	0.379075
1697	0.00298828	44.2	3.771	4.545	15.909	3.03	12.1212	9.49652	117.124	33.333	74.19	41.94	0	3.23	77.42	0	1186.46	1290.75	2.92018	1.13723
1698	0.0013896	38.9	3.375	3.704	18.519	0	14.2857	14.5369	115.141	68.571	75	33.33	0	0	100	0	1173.64	1299.99	2.84907	1.5163
1699	0.00426458	38.9	3.388	3.614	14.458	1.205	13.1579	8.24967	114.9	38.71	63.16	42.11	0	23.68	63.16	0	1205.95	1358.77	2.87694	1.89538
1700	0.00650433	38.1	3.594	2.419	16.129	3.226	10.4478	35.5947	104.546	57.143	45.28	39.62	0	30.19	39.62	0.04	1204.9	1407.96	2.84808	6.0652
1701	0.00184818	0	0	0	0	0	11.5385	0	0	62.5	50	50	0	50	0	0	1129.88	1448.99	2.84826	0
1702	0.0016288	11.7	3.167	0	5.263	0	0	19.0814	36.8369	0	85.71	28.57	0	28.57	0	0	1104.5	1431.04	2.8967	1.5163
1703	0.00163715	36	3.278	6.78	16.949	0	0	14.0586	109.947	0	64.29	28.57	0	28.57	100	0	1132.11	1351.79	2.93102	0
1704	0.00144476	38.1	3.929	1.818	12.727	9.091	0	14.4387	96.9021	0	61.54	53.85	0	0	100	0	1136.55	1303.38	2.96469	4.5489
1705	0.00127501	38.4	3.267	6.122	16.327	2.041	18.2927	15.0489	117.646	57.143	92.86	35.71	0	0	100	0	1086.67	1317.8	3.0148	2.27445
1706	0.00342822	25.7	3.143	9.091	14.773	3.409	17.5141	11.8056	81.675	63.492	38.1	61.9	0	0	95.24	0.1	1036.81	1333.96	3.04011	3.0326
1707	0.00184812	44.4	3.417	8.537	24.39	3.659	33.3333	12.2105	129.862	50	46.67	40	0	40	53.33	0	1082.02	1365.71	2.96719	1.89538
1708	0.00120516	0	0	0	0	0	19.7183	0	0	54.167	66.67	55.56	0	55.56	55.56	0.21	1031.94	1381.3	2.99908	0
1709	0.00835963	29.2	3.169	4.918	16.803	3.279	20.8333	6.34002	92.1094	69.565	35.71	37.5	0	17.86	76.79	0.16	1128.2	1386.31	2.75775	14.7839
1710	0.00161991	37	3	5	11.667	0	16.5138	13.9667	123.464	23.377	40	46.67	0	53.33	100	0	1128.2	1386.31	2.76498	0.75815
1711	0.0019349	39.8	3.85	1.299	18.182	0	0	71.4075	103.365	0	58.82	29.41	0	5.88	88.24	0	1111.32	1336.32	2.81097	1.89538
1712	0.00102598	33.1	3.778	0	5.882	0	15.0327	16.8269	87.7206	57.143	77.78	44.44	0	33.33	88.89	0	1190.7	1370.31	2.80237	1.5163
1713	0.00342003	37.1	4.097	2.362	18.11	0	14.2857	9.71239	90.6424	6.667	27.27	40.91	0	22.73	90.91	0	1207.52	1419.99	2.79884	0.75815
1714	0.00143945	50.7	3.318	0	16.438	4.11	4.16667	12.8726	152.836	50	57.14	7.14	0	21.43	0	0	1205.95	1457.22	2.84656	1.13723
1715	0.00224513	33	3.524	1.351	17.568	1.351	26.5306	12.7955	93.5359	44.444	70	25	0	15	45	0.1	1205.95	1457.22	2.82934	3.79075
1716	0.00119908	26.7	4	0	34.375	0	8	17.0962	66.7177	6.452	70	0	0	10	60	0	1209.08	1506.55	2.84854	0
1717	0.0109947	18.5	3.83	4.926	21.675	1.97	10.5263	7.21832	48.2049	6.667	43.55	50	0	17.74	51.61	0.21	1201.24	1513.64	2.77503	2.27445
1718	0.000461924	0	0	0	0	0	10.7143	0	0	33.333	100	100	0	0	100	0	1190.17	1536.37	2.73627	0
1719	0.00090574	34.2	3.444	0	19.355	0	0	17.2342	99.3663	0	100	66.67	0	33.33	100	0.23	1122.6	1482.94	2.74502	1.5163
1720	0.0043055	14.4	3.647	3.226	16.129	0	23.5294	78.3197	39.4843	69.231	48.28	68.97	0	31.03	72.41	0.25	1145.94	1533.08	2.73173	0.379075
1721	0.000343701	0	0	0	0	0	0	0	0	0	66.67	0	0	0	100	0	1170.96	1583.23	2.74016	0
1722	0.000147306	0	0	0	0	0	14.5455	0	0	76.471	100	0	0	0	100	0	1170.96	1583.23	2.733	0
1723	0.000330266	0	0	0	0	0	0	0	0	0	100	0	0	0	100	0	1170.96	1583.23	2.73198	1.5163
1724	3.4001e-05	0	0	0	0	0	0	0	0	0	100	0	0	0	100	0	1205.43	1609.67	2.73173	0
1725	0.00982051	24	3.688	4.661	19.492	1.695	17.5	36.8932	65.1698	81.818	62.69	34.33	0	1.49	89.55	0.21	1034.99	1164.48	2.98927	4.92798
1726	0.00195818	28.6	3.5	5.357	10.714	8.929	16.6667	14.3417	81.7087	54.054	70.59	76.47	0	0	88.24	0	1102.78	1242.49	2.90721	0.379075
1727	0.00223619	41.6	3.72	0	16.129	0	29.6296	11.4882	107.326	90	71.43	23.81	0	0	100	0	1140.98	1250.58	2.89498	1.89538
1728	0.00206216	35.9	2.96	6.757	13.514	0	15.4762	12.7955	121.232	75	40	40	0	6.67	86.67	0	1109.62	1201.24	2.92865	2.27445
1729	0.00177675	43.9	3.391	10.256	14.103	0	20.5882	12.4961	129.45	60	66.67	66.67	0	0	80	0	1079.69	1151.97	2.96231	1.5163
1730	0.00258584	42.5	3.333	5.455	17.273	3.636	13.4146	59.797	127.618	80.952	74.07	40.74	0	0	92.59	0.07	1172.03	1224.1	2.9946	1.5163
1731	0.00518277	33.2	3.308	8.14	17.442	0.581	23.2558	8.06286	100.332	66.667	51.22	53.66	0	2.44	92.68	0.05	1143.18	1255.11	3.00475	7.20243
1732	0.00153413	39.8	3.05	8.197	22.951	1.639	23.5294	78.8284	130.367	92.857	88.24	58.82	0	0	88.24	0	1184.87	1241.99	2.95012	0.75815
1733	0.000566225	40.6	2.875	17.391	21.739	8.696	24.2038	18.4232	88.3042	67.308	71.43	28.57	0	0	100	0	1136.55	1303.38	2.98115	0.75815
1734	0.00380727	34.9	3.5	3.759	21.053	4.511	3.07692	9.45449	97.1825	21.053	56.67	50	0	3.33	100	0.06	1044.08	1286.84	3.05626	4.92798
1735	0.00431012	48	3.286	6.763	19.324	2.899	28.5714	7.12206	146.168	100	65.71	17.14	0	0	91.43	0	1053.69	1239.96	3.05817	0.75815
1736	0.00648608	23.3	3.356	7.285	13.245	1.987	12.8713	8.75691	60.1287	48.438	25.71	74.29	0	2.86	37.14	0.17	955.863	994.629	3.02817	4.16983
1737	0.0112203	26.1	3.256	5.119	18.089	0	0	5.53511	63.2784	0	35.29	42.65	0	1.47	67.65	0.16	974.792	1065	3.01793	6.44428
1738	0.00152946	31.4	3.2	2.083	12.5	0	14.8148	15.1557	78.459	55	30	40	0	10	70	0	1086.09	1132.66	2.9793	0.379075
1739	0.00258412	35.6	3.68	2.174	20.652	0	16.4557	11.5503	81.2656	90.909	69.23	50	0	7.69	100	0	1162.86	1175.79	2.99074	1.5163
1740	0.00300902	33.6	3.367	4.95	16.832	0	19.6262	11.0143	93.0536	53.333	87.5	56.25	0	0	100	0	1136.55	1127.64	3.00596	3.0326
1741	0.000969218	22.7	3.143	9.091	4.545	4.545	9.61538	18.5834	72.2231	88.889	77.78	88.89	0	0	88.89	0	1093.6	1114.15	2.97116	0
1742	0.00301233	37.2	3.862	5.357	15.179	0	10.9091	10.4232	89.6316	93.75	68	52	0	0	96	0	1067.95	1065.59	2.99653	0.75815
1743	0.00149277	40.2	3.529	5	11.667	16.667	19.6078	13.9667	107.183	66.667	94.74	47.37	0	0	31.58	0	1144.84	1143.18	3.06002	0.379075
1744	0.00204687	46.4	3.519	3.158	23.158	2.105	17.0455	11.3659	107.481	75	56.25	37.5	0	6.25	100	0	1083.76	1207.52	3.06032	0.75815
1745	0.00441332	22.4	3.808	11.111	16.162	1.01	0	11.1291	54.3808	0	36.36	59.09	0	0	0	0	1065.59	1193.34	3.08386	1.89538
1746	0.00655502	34.2	3.2	3.125	17.857	1.339	22.3404	38.2899	91.5329	41.379	56	48	0	0	60	0	1111.89	1079.69	3.03845	7.5815
1747	0.00400138	30.5	3.486	6.557	10.656	1.639	0	56.4589	69.9759	0	60.61	21.21	0	39.39	78.79	0	1134.33	1048.9	3.08318	0.75815
1748	0.00530221	32.4	3.44	2.907	18.605	2.326	15.873	8.06286	84.8702	73.684	80	8	0	50	100	0	1095.91	1101.07	3.14178	1.13723
1749	0.00465785	39.3	3.268	2.186	15.847	4.372	8.53659	7.74147	94.4642	4.545	78.72	8.51	0	40.43	87.23	0	1128.2	1067.95	3.11974	3.79075
1750	0.00869148	29.9	3.562	7.308	11.154	3.077	0	6.05262	75.9365	0	53.62	21.74	0	50.72	37.68	0	1065.59	969.607	3.08389	4.16983
1751	0.0028332	64.9	2.788	2.717	19.022	2.174	16.4557	43.82	232.952	71.111	63.64	0	0	0	18.18	0	1067.95	1077.93	3.17067	2.27445
1752	0.00159502	36.4	2.762	5.172	20.69	6.897	5.08475	14.1517	112.851	27.778	100	0	0	95.45	86.36	0	988.911	1136.55	3.18596	0
1753	0.000859183	0	0	0	0	0	14.4144	0	0	10.256	100	0	0	83.33	50	0	1002.2	1145.94	3.18968	0
1754	0.00198367	32.8	3.095	4.615	7.692	12.308	15.3846	13.5246	95.7822	0	90	0	0	70	70	0	952.561	1224.1	3.16646	1.13723
1755	0.00121557	32.1	3	0	25.641	10.256	17.2414	16.1893	90.4927	15.385	88.89	0	0	33.33	66.67	0	1000.31	1201.24	3.16199	2.27445
1756	0.010095	24.9	3.218	6.375	16.335	0	6.66667	6.21099	61.4168	50	63.51	16.22	0	31.08	28.38	0	1067.36	931.829	3.13092	3.41168
1757	0.0102854	33	3.198	5.605	16.519	0	14.9425	4.94567	82.6417	32.075	60.76	36.71	0	44.3	72.15	0	1029.5	922.996	3.08157	0.75815
1758	0.00270105	24.1	3.095	12.308	13.846	0	22.2222	13.5246	66.6406	55.556	50	15	0	20	20	0	923.678	841.579	3.04844	0.75815
1759	0.00165775	16.9	2.8	0	14.286	7.143	13.7931	17.6616	48.2582	33.333	61.54	15.38	0	46.15	76.92	0.15	890.332	846.803	3.05427	0.75815
1760	0.00129395	44.1	2.85	7.018	15.789	0	50	14.2461	108.196	75	25	50	0	50	100	0.21	876.782	866.662	3.04065	1.89538
1761	0.00353887	7.9	2.545	7.143	14.286	3.571	21.4286	100.334	25.4319	88	66.67	7.41	0	33.33	48.15	0.34	898.083	916.144	3.03941	0
1762	0.00113679	44	3.846	0	22	0	5.06329	14.9437	87.9669	0	37.5	37.5	0	62.5	100	0	943.254	925.723	3.03197	1.13723
1763	0.00141651	26.8	2.923	10.526	15.789	2.632	23.1579	16.313	91.7751	77.778	75	8.33	0	50	100	0	955.863	907.158	3.02834	1.5163
1764	0.00341869	30.7	3.182	14.286	15.238	6.667	12.4088	111.823	78.9777	43.59	61.29	67.74	0	0	96.77	0.1	931.829	945.256	3.03352	2.27445
1765	0.0154012	23.6	3.339	7.143	14.56	1.923	5.85366	4.67509	68.8259	11.972	38.1	58.33	3.57	29.76	73.81	0.17	724.058	905.072	2.98344	4.92798
1766	0.00178818	34.7	3.444	8.065	19.355	0	14.2857	13.7864	100.661	33.333	30.77	69.23	0	30.77	100	0	607.659	895.976	2.92644	2.27445
1767	0.00409242	22.5	3.407	9.783	15.217	2.174	12.381	11.5503	61.0886	52.941	41.67	54.17	0	20.83	45.83	0.15	639.983	945.256	2.87872	0.379075
1768	0.000827104	19.3	3.2	0	25	6.25	18.2371	19.6067	60.4519	10.377	66.67	100	0	66.67	100	0	710.884	986.998	2.93829	0
1769	0.00419121	37.9	3.457	8.176	14.465	1.887	12.4481	8.47887	107.367	37.143	40.63	53.13	0	31.25	100	0.17	788.225	979.307	3.01464	2.27445
1770	0.0151253	28	3.475	4.481	16.274	0.943	8.23529	4.13249	78.6763	17.391	54.55	27.27	0	16.67	30.3	0.19	817.268	1055.49	3.00894	0
1771	0.002051	25.8	3.533	3.774	26.415	0	0	14.6365	73.1351	0	81.82	0	0	0	0	0	852.736	1079.69	3.01859	1.5163
1772	0.00517678	30.3	3.271	6.369	17.834	0	17.8571	8.54671	90.7901	27.778	40.63	34.38	0	21.88	100	0.06	674.497	994.629	2.87528	4.5489
1773	0.00637545	22.3	3.463	8.451	11.972	1.408	6.66667	9.09234	64.3092	0	16.13	22.58	3.23	12.9	9.68	0	713.538	1073.25	2.84568	3.41168
1774	0.00666179	20.7	3.632	6.522	14.493	2.174	13.3663	9.24981	54.0395	11.864	3.57	46.43	0	25	10.71	0	738.704	1122.6	2.82261	3.0326
1775	0.00437604	24.9	3.114	5.505	22.018	0.917	18.5185	60.0931	75.4107	4	0	6.25	6.25	12.5	25	0	508.28	561.302	3.15181	1.89538
1776	0.00429694	23.3	3.226	7	15	0	4.44444	11.0714	65.1626	6.667	0	31.25	6.25	31.25	50	0.25	642.93	628.056	3.21447	1.5163
1777	0.00840215	19.5	3.644	10.976	14.024	1.22	13.5135	47.2306	52.3676	46.667	19.23	11.54	11.54	19.23	88.46	0.07	585.478	632.057	3.26804	0
1778	0.00945888	12.4	3.25	6.838	18.803	0.855	27.907	10.175	35.9451	52.941	3.45	62.07	0	48.28	41.38	0.59	714.421	728.396	3.17042	1.89538
1779	0.0010503	34.3	4	5.556	16.667	0	13.5802	16.566	85.6895	47.727	50	37.5	0	37.5	100	0	731.848	778.572	3.10614	0.379075
1780	0.0016259	17.2	3.111	3.571	25	0	19.3548	17.6616	49.2036	88.889	30	50	0	50	90	0.57	764.69	804.837	3.09361	0
1781	0.00741195	35.6	3.568	3.03	15.53	1.515	8.33333	5.9848	94.4421	62.5	20.93	27.91	2.33	25.58	48.84	0.12	718.817	803.27	3.08883	7.20243
1782	0.00240323	20.4	2.882	22.449	14.286	0	30.7692	15.0489	70.7381	80	33.33	66.67	0	26.67	73.33	0.24	775.328	878.935	3.02074	1.89538
1783	0.00691689	26.5	3.268	3.825	19.126	0	12.6866	43.9788	63.6124	48.78	0	24.24	0	24.24	18.18	0	663.192	831.788	3.03251	5.30705
1784	0.026624	17.5	3.221	3.64	18.63	1.071	9.89011	3.81515	53.3353	14.286	32.26	77.42	6.45	58.06	16.13	0.16	508.28	700.166	4.02547	11.7513
1785	0.00122065	13.1	2.667	6.25	12.5	6.25	14.8936	203.163	49.1543	44.681	60	0	0	0	0	0.43	383.99	639.983	3.136	0.75815
1786	0.00188681	44.5	3.231	4.762	21.429	0	19.5652	12.0724	132.499	76.923	60	53.33	0	6.67	100	0	780.997	700.166	3.16194	0.75815
1787	0.00385129	6.8	2.889	3.846	11.538	0	0	102.021	23.3688	0	65.38	0	0	3.85	19.23	0.14	709.997	639.983	3.2151	0.75815
1788	0.00623882	0	0	0	0	0	22.2222	0	0	66.667	0	0	0	0	100	0	939.908	766.336	3.37023	0
1789	0.0126589	1.1	2.8	0	14.286	0	18.1034	19.9734	3.94979	48.649	100	0	0	0	0	0	929.12	785.823	3.16104	0.379075
1790	1.79892e-05	0	0	0	0	0	15.1515	0	0	53.571	0	0	0	0	0	0	854.95	731.848	3.16104	0
1791	3.983e-05	0	0	0	0	0	16.9492	0	0	22.222	100	0	0	0	100	0	854.95	731.848	3.16104	0
1792	0.00293559	35.1	3.323	2.913	19.417	0.971	0	10.9019	98.7876	0	68.18	40.91	0	40.91	86.36	0	959.153	843.822	3.11099	1.5163
1793	0.00302208	36.4	3.235	10	16.364	0	7.14286	10.5259	102.578	25	40	40	0	65	45	0	887.496	793.801	3.08447	2.65353
1794	0.00349514	29.8	3.586	7.692	16.346	0	13.7255	10.8466	80.1113	78.571	34.48	37.93	0	55.17	62.07	0.22	857.893	817.268	3.08025	6.0652
1795	0.00555338	19.8	3.667	4.545	14.545	0.909	20.4082	10.5259	54.0211	41.935	19.23	46.15	0	53.85	92.31	0.12	854.95	797.76	3.0915	1.5163
1796	0.000798664	15	2.4	8.333	0	8.333	28.9474	20.354	50.0836	58.333	50	66.67	0	66.67	100	0.28	784.217	738.704	3.12551	0.75815
1797	0.00184418	27.1	3.333	10	16	0	16.8317	14.9437	70.4921	70	9.09	100	0	0	90.91	0.21	781.803	718.817	3.14258	3.41168
1798	0.00123826	32.3	3.333	12.5	10	7.5	13.8889	16.0676	96.9105	20	58.33	58.33	0	0	100	0	816.496	730.987	3.13641	1.89538
1799	0.00213076	29.1	3.1	8.065	14.516	4.839	13.8614	13.7864	84.4768	70.968	50	85.71	0	0	92.86	0	817.268	714.421	3.15029	4.5489
1800	0.00271689	34.2	3.577	4.301	21.505	2.151	17.3913	11.4882	95.6975	66.667	60.87	47.83	0	4.35	100	0.15	746.342	651.691	3.20149	0
1801	0.00792092	34.7	3.235	7.636	14.909	0	9.58904	5.80588	102.261	42.105	15.56	64.44	2.22	2.22	60	0	753.065	619.978	3.21282	4.92798
1802	0.00881318	25.4	3.294	8.482	15.179	0.446	19.4332	38.2899	72.6185	28.395	25.49	74.51	1.96	15.69	92.16	0	758.9	606.622	3.20252	1.13723
1803	0.00398106	39.2	3.628	2.564	14.744	1.282	8.69565	8.58104	95.4519	75	42.86	75	0	3.57	100	0	835.567	663.192	3.17207	4.16983
1804	0.00218132	37.1	3.375	9.877	16.049	3.704	16.6667	12.2806	105.441	46.154	33.33	73.33	0	20	80	0	731.848	561.302	3.20752	0
1805	0.00158853	38.4	3.588	9.836	27.869	0	16.6667	13.876	107.017	6.667	58.33	83.33	0	8.33	100	0	775.328	585.478	3.18791	0.75815
1806	0.00111967	33.9	4.222	7.895	15.789	2.632	18	16.313	80.3808	35.294	62.5	100	0	12.5	100	0	785.823	577.896	3.18559	0.75815
1807	0.000890178	31.5	3.5	7.143	10.714	0	18.6722	17.6616	89.8697	73.611	50	83.33	0	16.67	50	0	797.76	572.418	3.21006	0
1808	0.000852603	21.1	3.6	16.667	0	0	11.8519	19.2533	58.644	36.585	50	100	0	50	100	0	797.76	572.418	3.21006	0
1809	0.00216506	22.6	3.063	6.122	18.367	0	8.43373	15.0489	69.2821	32.143	10	60	0	40	30	0	731.848	502.044	3.22779	2.65353
1810	0.00127577	20.4	3.25	0	23.077	0	14.2857	17.9585	62.7073	20	0	100	0	83.33	100	0	718.817	508.28	3.21012	1.13723
1811	0.0014447	25.6	2.467	8.108	16.216	0	21.3333	93.386	103.828	56.522	0	40	0	20	60	0	673.562	482.85	3.2378	1.89538
1812	0.00297163	26.2	3.12	5.128	16.667	0	10.7143	12.4961	84.1288	62.5	0	80	10	50	100	0	652.657	439.109	3.22604	1.89538
1813	0.00435193	15.2	2.87	10.606	9.091	0	15.5556	76.3489	50.5523	27.586	0	87.5	0	50	100	0.34	606.622	415.515	3.31117	1.89538
1814	0.00385917	25.1	3.233	2.062	14.433	4.124	10.3448	11.2463	75.1456	55.556	7.14	78.57	0	35.71	100	0.2	629.059	461.498	3.34119	1.13723
1815	0.00249119	8.8	3.667	9.091	22.727	0	20.297	105.571	24.0848	51.563	0	87.5	0	12.5	100	0.27	647.811	524.149	3.28031	1.13723
1816	0.00106126	0	0	0	0	0	10	0	0	83.333	0	100	0	0	100	0	642.93	541.882	3.28786	0
1817	0.00422317	26	3.548	8.182	21.818	2.727	15.625	10.5259	66.301	16.667	0	86.67	0	53.33	100	0	587.627	370.629	3.21759	1.89538
1818	0.00255635	13.7	2.917	8.571	11.429	2.857	22.4138	94.8456	46.942	44.444	0	62.5	12.5	37.5	87.5	0.23	541.882	292.739	3.18453	0
1819	0.0012305	17.9	2.75	4.545	18.182	0	33.3333	105.571	65.0141	45.455	0	75	0	25	100	0.46	532.498	251.022	3.1686	0.379075
1820	0.00431545	8.6	3.083	5.405	16.216	27.027	10.7143	16.4385	25.4898	50	17.65	88.24	5.88	52.94	76.47	0.29	577.896	251.022	3.18485	2.27445
1821	0.00224461	30.3	3.579	4.412	14.706	0	10.7143	13.2725	80.1922	91.667	0	62.5	12.5	12.5	75	0	628.056	292.739	3.22811	1.89538
1822	0.00159392	37	3.471	10.169	23.729	5.085	20	14.0586	106.655	62.5	0	60	20	40	100	0	632.057	321.465	3.23896	4.16983
1823	0.00183285	32.7	4	1.667	13.333	3.333	14.2857	13.9667	70.928	11.765	0	71.43	14.29	14.29	100	0	620.994	356.769	3.21644	1.13723
1824	0.00269795	41.5	3.294	6.25	20.536	1.786	22.9508	10.4232	126.022	45.455	8.33	75	0	41.67	0	0	682.853	427.475	3.24483	0
1825	0.00114855	27.9	3.556	0	15.625	0	9.18367	17.0962	78.3595	29.412	0	50	0	25	0	0	669.81	390.498	3.25242	0.379075
1826	0.00237455	29.1	3.632	2.899	23.188	1.449	15.3846	74.9347	75.8039	67.857	15.38	69.23	0	38.46	23.08	0.14	681.93	362.029	3.27587	0.75815
1827	0.00513543	23.6	3.27	1.653	16.529	0.826	0	56.7227	70.1012	0	10	50	5	5	70	0	731.848	404.761	3.30413	1.13723
1828	0.00449004	32.5	3.244	6.849	13.014	4.11	8.16327	8.94014	91.3131	50	0	75	0	30	0	0	762.214	496.998	3.27462	3.41168
1829	0.00198186	28.8	3.353	5.263	22.807	0	5	14.2461	85.778	71.429	0	44.44	11.11	11.11	0	0	779.381	498.264	3.29787	0.75815
1830	0.00231637	24.2	3.111	5.357	8.929	8.929	27.7778	14.3417	69.0735	100	0	90	0	10	0	0	841.579	569.106	3.27768	3.0326
1831	0.00184415	11.4	3	9.524	4.762	0	13.5135	18.7465	37.9579	77.778	0	100	0	50	50	0	889.624	607.659	3.27518	3.0326
1832	0.00158248	34.1	3.6	3.704	20.37	0	4.44444	14.5369	94.7878	46.667	25	0	0	0	0	0	952.561	678.224	3.23674	0.75815
1833	0.00140547	18.5	3.25	7.692	26.923	0	11.7647	17.9585	56.9203	23.529	0	0	0	50	0	0.43	907.158	612.822	3.30996	0
1834	0.0023129	22.5	3.714	3.846	7.692	0	10.2041	83.7226	60.53	29.412	0	20	10	40	0	0	827.992	537.21	3.31353	0
1835	0.00162998	33.1	3.176	11.111	5.556	0	15	14.5369	104.296	58.333	0	85.71	0	14.29	42.86	0	788.225	473.627	3.33638	0
1836	0.00165922	28.9	4	0	18.75	0	11.5385	15.1557	72.3231	50	25	75	0	75	25	0	837.826	516.886	3.36954	6.44428
1837	0.00230455	26.5	2.905	13.115	6.557	1.639	7.14286	13.876	78.1062	77.778	9.09	81.82	0	9.09	27.27	0	781.803	449.042	3.32552	0.379075
1838	0.0107528	25	3.363	5.948	16.729	0.372	10.7143	5.90212	66.9592	46.154	53.52	84.51	0	42.25	73.24	0.03	864.478	642.93	3.2185	2.65353
1839	0.00503358	33.8	3.4	4.706	14.118	2.353	23.8095	8.12418	95.3596	37.5	56.1	75.61	0	14.63	95.12	0	922.996	674.497	3.22685	7.5815
1840	0.00360591	26.6	3.31	11.458	15.625	6.25	11.1111	11.3058	69.3306	0	36.36	36.36	0	0	100	0	1002.2	746.342	3.26656	6.0652
1841	0.00407648	27	3.438	3.636	15.455	0	0	10.5259	76.0461	0	59.26	37.04	0	3.7	44.44	0	1022.12	780.997	3.2932	1.13723
1842	0.000866643	27.7	3.429	0	8.333	0	7	18.2656	80.7715	6.452	33.33	0	0	0	0	0	1010.34	781.803	3.28687	1.13723
1843	0.00186397	39.7	3.217	2.703	21.622	0	14.346	12.7955	112.663	60	41.67	0	0	0	41.67	0	999.685	784.217	3.28278	0.379075
1844	0.00343227	31.5	3.6	8.333	14.815	0	5.40541	10.6307	81.5786	12.5	0	0	0	0	11.11	0	955.863	753.065	3.25096	1.89538
1845	0.00185002	50.8	3.133	2.128	17.021	0	0	11.4267	162.16	0	20	0	0	0	0	0	947.254	758.9	3.23352	3.0326
1846	0.00175057	16.6	3.625	0	10.345	0	7.8125	17.5168	45.6995	36.364	0	0	12.5	0	0	0	1051.3	863.749	3.25792	0.379075
1847	0.00342352	31.3	3.567	3.738	14.953	0	0	10.6838	78.8661	0	11.11	0	0	0	27.78	0	1059.06	858.627	3.28426	2.65353
1848	0.0023665	23.2	3.667	0	27.273	0	4.34783	14.4387	63.3846	14.286	0	0	0	0	0	0	1067.95	854.95	3.30292	0.379075
1849	0.00217965	25.2	3.929	1.818	9.091	7.273	8.69565	14.4387	64.2304	0	0	0	0	0	0	0.11	1088.98	851.996	3.31887	0.379075
1850	0.00326261	35.6	3.625	1.724	21.552	0.862	7.69231	10.2237	95.016	0	4.17	0	0	0	12.5	0	1134.33	888.206	3.28865	1.5163
1851	0.0162416	9.7	3.16	11.392	14.557	1.266	5.94059	48.3598	30.1695	68.75	22.22	74.6	0	6.35	74.6	0.11	141.999	1882.83	3.15816	0
1852	0.00306243	8.8	2.7	0	18.519	0	19.4805	17.8088	29.3884	58.333	46.67	46.67	0	13.33	86.67	0	127.997	1952.81	3.09889	0.75815
1853	0.00911227	13.9	3.342	5.512	17.323	1.575	14.3791	9.71239	40.6046	71.765	35.56	64.44	0	0	97.78	0	191.173	1845.99	3.10731	0.75815
1854	0.00085267	22.3	2.714	0	21.053	0	0	19.0814	82.0951	0	62.5	0	0	25	100	0	258.443	1774.99	3.11994	0
1855	0.0250243	18.1	3.082	3.532	15.011	1.766	7.28477	3.91298	52.3492	52.083	39.34	17.21	0	31.97	89.34	0	303.311	1739.85	3.13021	8.71873
1856	0.00107931	13.9	3	6.667	6.667	0	0	19.7884	46.3259	0	0	0	0	50	100	0	277.263	1813.62	3.0866	0
1857	0.00582924	11.5	3.19	5.97	8.955	1.493	18.2266	75.8716	36.0253	55.556	13.64	9.09	0	18.18	90.91	0	413.996	1674.52	3.04726	4.92798
1858	0.00515134	16.9	3.222	2.299	11.494	3.448	18.1818	11.8712	50.4723	58.824	36.36	0	0	27.27	100	0	415.515	1634.54	3.12882	1.13723
1859	0.00406826	11.8	2.667	2.083	10.417	8.333	8.69565	86.0984	41.787	22.222	29.41	11.76	0	17.65	82.35	0	494.456	1565.62	3.12101	0.75815
1860	0.00335946	16.4	3.056	5.455	16.364	0	0	14.4387	50.6033	0	47.06	0	0	5.88	76.47	0	527.743	1530.2	3.11453	0
1861	0.00630929	26.5	3.275	1.796	22.156	2.395	15.6627	8.21794	77.6632	6.667	70.83	18.75	0	27.08	79.17	0	587.627	1501.52	3.11567	2.27445
1862	0.000158877	0	0	0	0	0	6.25	0	0	64.706	0	0	0	0	0	0	524.149	1572.05	3.04201	0
1863	0.00197943	21.7	3.909	2.326	20.93	0	23.0769	89.2648	50.5196	87.5	27.27	0	0	9.09	54.55	0	603.497	1506.13	3.05565	0
1864	0.00147371	11.5	2.833	11.765	11.765	5.882	9.85915	19.4284	40.7135	45.833	0	0	0	0	100	0	682.853	1441.57	3.06175	0
1865	0.00120992	21.5	3.714	0	11.538	0	6.99301	17.9585	57.8549	63.265	42.86	0	0	0	0	0	666.982	1435.88	3.09898	0
1866	0.00897602	0	0	0	0	0	7.5	0	0	57.692	0	100	0	0	100	0	317.52	1752.48	3.30397	0
1867	0.00617912	18.1	3.394	6.25	22.321	0	12.9412	59.2135	51.7873	54.839	4.17	100	0	0	66.67	0	251.022	1778.18	3.19423	1.89538
1868	0.00579444	15.2	2.75	7.955	9.091	5.682	9.13462	11.8056	53.4996	57.252	26.67	86.67	0	6.67	100	0	319.499	1705.47	3.24038	1.5163
1869	0.0105717	15.7	3.32	2.41	15.663	4.819	0	8.24967	45.404	0	27.27	72.73	0	0	63.64	0	390.498	1634.54	3.29311	5.30705
1870	0.0061713	0	0	0	0	0	0	0	0	0	0	0	0	0	0	0	502.044	1526.49	3.25992	0
1871	0.00701828	19	3.244	3.008	14.286	0	10	9.45449	54.1443	20	38.46	12.82	0	10.26	92.31	0.06	533.68	1494.79	3.4244	1.89538
1872	0.00376996	19.1	3	1.389	19.444	0	8.51064	12.9507	58.3561	0	50	0	0	13.64	100	0	502.044	1533.08	3.45214	2.65353
1873	0.00128784	17.9	3.833	0	17.391	0	0	18.4232	46.5896	60	80	0	0	0	100	0	466.928	1568.43	3.42647	0
1874	0.00317427	11.7	3.083	5.405	8.108	0	5.55556	93.386	31.5033	29.412	9.09	27.27	0	18.18	63.64	0	439.109	1607.32	3.43575	0.379075
1875	0.00438903	15	3.3	13.636	6.061	7.576	9.41176	13.4395	41.0114	26.667	7.14	50	0	21.43	100	0	404.761	1642.61	3.40062	2.65353
1876	0.00305732	9.5	2.636	13.793	13.793	0	15	17.5168	35.9792	13.043	8.33	58.33	0	50	100	0.16	370.629	1677.91	3.37302	0.379075
1877	0.0112888	8.3	3.133	0	14.894	3.191	20	64.9145	23.9176	60	28.95	21.05	0	15.79	55.26	0.23	572.418	1567.23	3.59994	1.13723
1878	0.00182829	15.9	3.625	3.448	6.897	0	4	17.5168	43.7567	2.083	22.22	0	0	0	0	0	461.498	1616.71	3.48859	1.13723
1879	0.00220089	18.2	3.333	0	15	0	12.7273	16.0676	45.4362	52.055	18.18	0	0	0	18.18	0	494.456	1581.64	3.52852	0
1880	0.00106761	17.8	3.167	0	15.789	0	8.87097	19.0814	46.8338	47.368	57.14	0	0	0	100	0	516.886	1541.28	3.5276	0
1881	0.00420919	17.1	3.6	1.389	22.222	1.389	22.3256	73.5719	47.5151	70.588	14.29	0	0	0	42.86	0	619.978	1490.15	3.58366	0.75815
1882	0.00397597	14.6	3.222	3.448	10.345	0	17.2414	14.1517	42.7568	37.5	11.76	0	0	5.88	0	0.12	606.622	1482.94	3.57744	0
1883	0.00248526	12.5	3.1	6.452	9.677	0	0	17.2342	32.1897	33.333	37.5	0	0	12.5	50	0	551.106	1506.13	3.56305	0
1884	0.00140894	10.6	3	13.333	33.333	0	1.16279	19.7884	35.4876	37.037	0	20	0	40	100	0.23	619.978	1435.88	3.53137	0.75815
1885	0.00798908	9.6	2.852	3.896	14.286	5.195	10	71.4075	31.2927	9.091	30.77	7.69	0	11.54	42.31	0.17	603.497	1421.77	3.35873	1.5163
1886	0.00533398	0	0	0	0	0	0	0	0	0	10	30	0	0	0	0	629.059	1423.98	3.19126	0
1887	0.0128782	13.7	3.034	6.25	19.886	0	15.1163	7.94295	41.1547	27.273	31.48	16.67	0	1.85	94.44	0.18	112.26	1995.9	3.06208	1.5163
1888	0.00066072	0	0	0	0	0	15.1515	0	0	33.333	66.67	16.67	0	16.67	100	0	79.3801	2063.88	3.03315	0
1889	0.0071432	10.1	2.88	8.333	12.5	0	9.375	12.9507	33.5984	49.057	21.43	21.43	0	0	92.86	0.08	146.37	2069.98	3.03201	1.13723
1890	0.00750775	10.8	3.375	12.346	8.642	1.235	11.5385	69.7655	31.967	54.545	10	10	0	10	95	0	224.521	1973.04	3.07461	3.0326
1891	0.00844932	13.5	3.081	7.018	17.544	2.632	6.8323	10.3225	40.2399	44.643	37.14	11.43	0	8.57	97.14	0.06	270.359	1943.43	3.12581	0.75815
1892	0.00972576	18.9	3.016	3.261	20.652	0	7.01754	7.71352	57.579	33.333	49.18	4.92	0	1.64	75.41	0	365.493	1886.84	3.21983	1.13723
1893	0.00103248	60	3.1	1.613	14.516	1.613	9.48905	13.7864	174.337	6.977	100	5.56	0	0	83.33	0	444.812	1868.39	3.25384	0.75815
1894	0.0321794	11.8	3.123	3.412	15.223	2.1	16.4179	46.7052	36.0479	41.667	37.21	31.78	0	13.18	68.99	0.17	377.369	1768.59	3.36047	1.5163
1895	4.02251e-06	0	0	0	0	0	8.82353	0	0	47.414	0	0	0	0	0	0	177.499	1889.85	3.36047	0
1896	0.00592353	13.5	3.077	10	17.5	5	9.56522	12.3516	40.5164	2.857	34.62	50	0	34.62	46.15	0.23	610.762	1584.82	3.56524	0.379075
1897	0.000673175	25.3	3.4	0	17.647	11.765	0	19.4284	74.2749	0	57.14	57.14	0	28.57	100	0	604.541	1628.74	3.52224	1.89538
1898	0.0096209	20.5	3.031	3.046	18.274	2.538	0	7.36769	60.2854	0	61.9	53.97	0	26.98	0	0.19	702.861	1628.74	3.57938	1.89538
1899	0.00287432	15	3.308	2.326	23.256	2.326	8.5	89.2648	45.2281	4.688	25	33.33	0	33.33	91.67	0	327.292	2347.29	2.90869	0
1900	0.00503372	5.8	2.9	3.448	20.69	0	0	17.5168	17.8794	0	31.82	0	0	13.64	18.18	0.14	354.998	2324.9	3.09262	1.13723
1901	0.00382116	8.1	3.1	3.226	9.677	0	26.6667	17.2342	18.319	50	0	0	0	0	0	0	444.812	2430.64	2.96891	0.379075
1902	0.000404624	0	0	0	0	0	22.8571	0	0	50	0	0	0	0	0	0	476.28	2465.9	2.93974	0
1903	0.000251215	0	0	0	0	0	0	0	0	0	0	0	0	0	0	0	476.28	2465.9	2.93974	0
1904	6.24894e-05	0	0	0	0	0	10	0	0	0	0	0	0	0	0	0	461.498	2462.06	2.86048	0
1905	0.000128607	0	0	0	0	0	22.5	0	0	33.333	0	0	0	0	0	0	482.85	2494.1	2.85699	0
1906	0.00915395	10.4	2.794	4.211	15.789	3.158	0	11.3659	36.05	0	48.21	41.07	0	37.5	73.21	0.28	50.2044	2059.3	3.0503	0
1907	0.00238665	13.4	3.556	12.5	15.625	3.125	0	17.0962	37.7098	0	38.89	22.22	0	16.67	55.56	0.15	127.997	2094.79	3.05133	0.379075
1908	0.00403678	0	0	0	0	0	10.3448	0	0	0	0	0	0	0	100	0	158.76	2165.49	3.01243	0
1909	0.00372085	14.5	2.842	7.407	20.37	1.852	12.6984	14.5369	48.376	75	31.82	22.73	0	22.73	86.36	0.24	106.5	2131.17	2.99887	0
1910	0.00181458	13.2	2.4	4.167	12.5	8.333	17.3913	18.2656	49.5981	53.333	33.33	33.33	0	44.44	44.44	0	146.37	2168.11	2.97391	2.27445
1911	0.0171597	8.8	3.146	6.623	13.245	0	8.77193	8.75691	25.6414	43.243	14.29	23.21	0	26.79	96.43	0	270.359	2278.91	2.98812	1.89538
1912	0.0001309	0	0	0	0	0	0	0	0	0	100	50	0	50	100	0	215.937	2239.02	2.9386	0
1913	0.00474481	10.1	3.2	14.583	8.333	2.083	0	15.1557	31.6135	0	9.52	28.57	0	28.57	100	0	215.937	2239.02	2.94422	1.13723
1914	0.00548674	7.1	2.786	12.821	12.821	0	18.8034	16.1893	21.8709	10	0	42.86	0	35.71	100	0	283.999	2308.58	2.93984	0
1915	0.00133316	0	0	0	0	0	14.8936	0	0	40	25	62.5	0	62.5	100	0	251.022	2272.27	2.93234	0
1916	0.0022363	22.8	3.4	3.922	13.725	1.961	0	14.8398	67.0752	0	20	20	0	20	90	0	181.014	2201.28	2.93239	0.379075
1917	0.00338765	21.3	3.13	2.778	13.889	2.778	22.2222	73.5719	53.1342	85.714	61.54	30.77	0	34.62	92.31	0	206.998	2201.28	2.94764	6.82335
1918	0.0104745	13	3.317	5.882	16.912	0.735	14.0845	9.33061	37.2331	43.182	28.26	43.48	0	43.48	86.96	0.09	317.52	2308.58	2.91917	0
1919	0.0200542	8.7	3.431	3.429	12	1.714	11.1111	7.97259	22.9378	67.857	17.78	35.56	0	33.33	66.67	0.05	431.874	2449.49	2.91081	9.47688
1920	0.00019618	0	0	0	0	0	7.69231	0	0	0	0	0	0	0	0	0	516.886	2521.49	2.83327	0
1921	0.00225464	16.9	2.714	5.263	5.263	2.632	12.0482	16.313	62.0942	41.304	0	0	0	0	0	0	508.28	2520.74	2.84313	3.79075
1922	0.000111999	0	0	0	0	0	0	0	0	0	0	0	0	0	0	0	569.106	2591.73	2.77333	0
1923	0.00306359	10.8	3	3.03	18.182	0	0	16.9605	35.9055	0	0	0	0	0	0	0	439.109	2455.91	2.86048	1.5163
1924	0.000772889	22	3.4	0	29.412	0	17.2414	19.4284	64.6923	57.143	0	0	0	0	0	0	427.475	2451.8	2.87084	0.379075
1925	0.00654587	14.2	3.207	1.075	17.204	0	4.7619	11.4882	42.7751	50	36	28	0	28	88	0	390.498	2415.03	2.89193	2.27445
1926	0.00301388	15.9	3.429	0	16.667	0	3.125	15.1557	46.4517	45.455	25	0	0	8.33	50	0	404.761	2420.51	2.88424	3.41168
1927	0.0112256	14	3.271	8.28	18.471	2.548	0	8.54671	40.0871	0	36.54	19.23	0	5.77	94.23	0	206.998	2144.44	3.05906	1.89538
1928	0.00346587	12.7	3.385	6.818	9.091	0	0	15.5983	34.6233	0	0	27.27	0	9.09	100	0	258.443	2118.72	3.08246	1.5163
1929	0.0100684	12.4	3.205	2.4	12.8	6.4	14.7059	101.562	37.7418	33.333	11.43	25.71	0	2.86	68.57	0	292.739	2124.36	3.08636	6.44428
1930	0.00475898	16.6	3.038	3.797	18.987	0	11.1111	12.4235	50.431	16.667	44.44	18.52	0	18.52	81.48	0	319.499	2060.83	3.08716	0.75815
1931	0.0197055	12.3	3.227	4.132	14.876	0.826	14.2857	6.37788	37.0454	22.222	36.84	57.89	0	38.16	78.95	0	390.498	2075.45	3.11943	2.27445
1932	0.00247321	22.6	3.5	3.571	17.857	0	5.55556	14.3417	60.65	24	66.67	22.22	0	27.78	100	0	439.109	1980.37	3.14816	2.27445
1933	0.00281837	35.1	3.808	1.01	28.283	0	0	11.1291	85.1556	0	90	63.33	0	43.33	36.67	0	427.475	2049.17	3.09165	2.65353
1934	0.00128074	35.1	3.462	6.667	4.444	13.333	5.06329	15.4853	93.6955	3.448	64.29	85.71	0	71.43	50	0	425.998	2083.63	3.09897	1.13723
1935	0.0030044	16.6	3.333	12	10	0	0	14.9437	46.5982	57.143	66.67	72.22	0	38.89	66.67	0	439.109	2187.21	3.08232	1.13723
1936	0.000413398	0	0	0	0	0	24.5614	0	0	30.303	0	0	0	0	100	0	461.498	2256.41	3.0696	0
1937	0.00625129	5.9	3.364	5.405	16.216	5.405	0	16.4385	17.5964	0	8.33	16.67	0	8.33	33.33	0	444.812	2283.61	3.06948	0.379075
1938	0.00428643	10.7	2.875	6.522	13.043	0	21.2121	87.3376	34.9941	18.182	7.69	38.46	0	23.08	100	0	383.99	2270.33	3.0721	0.75815
1939	0.00357566	10.9	2.786	10.256	7.692	0	0	16.1893	30.7636	0	20	0	0	0	0	0.15	354.998	2264.49	3.05305	2.65353
1940	0.00197779	11.6	2.556	8.696	13.043	0	0	18.4232	45.5052	0	0	0	0	0	100	0	277.263	2219.24	3.0336	1.13723
1941	0.0011366	0	0	0	0	0	27.2727	0	0	33.333	0	0	0	0	100	0	251.022	2214.97	3.01568	0
1942	0.00398652	9.8	3.25	10.256	12.821	0	9.63855	91.9706	30.1014	41.379	17.65	17.65	0	11.76	35.29	0.27	377.369	2329.5	3.04399	0
1943	0.000169334	0	0	0	0	0	31.1111	0	0	42.857	0	0	0	0	0	0	477.602	2381.4	3.06948	0
1944	0.000146294	0	0	0	0	0	11.1111	0	0	22.222	0	0	0	0	0	0	454.62	2346.48	3.06948	0
1945	0.000100101	0	0	0	0	0	0	0	0	0	0	0	0	0	0	0	504.548	2388.01	3.00061	0
1946	0.0012325	17	3.5	9.524	9.524	0	0	18.7465	48.6817	0	0	0	0	0	0	0	582.241	2437.37	3.00061	0
1947	0.00224146	0	0	0	0	0	0	0	0	0	0	0	0	0	0	0	628.056	2534.2	2.94506	0
1948	0.0256395	0	0	0	0	0	0	0	0	0	0	0	0	0	0	0	925.723	2861.43	2.60744	0
1949	5.53639e-05	0	0	0	0	0	10	0	0	0	0	0	0	0	0	0	1065	2961.84	2.60744	0
1950	0.00144298	0	0	0	0	0	0	0	0	0	0	0	0	0	0	0	1151.97	3065.35	2.37538	0
1951	0.00042841	0	0	0	0	0	0	0	0	0	0	0	0	0	0	0	1114.15	3049.68	2.3871	0
1952	0.000205135	0	0	0	0	0	0	0	0	0	0	0	0	0	0	0	1181.67	3099.89	2.33684	0
1953	0.00359866	0	0	0	0	0	0	0	0	0	0	0	0	0	0	0	1230.78	3142.69	2.2836	0
1954	3.28971e-05	0	0	0	0	0	0	0	0	0	0	0	0	0	0	0	1156.34	3054.23	2.24056	0
1955	0.00423757	0	0	0	0	0	0	0	0	0	0	0	0	0	0	0	1274.54	3211.9	2.24056	0
1956	0.054162	0.7	3.6	0	13.889	0	20	16.566	1.66168	27.273	90	0	0	0	80	0	606.622	1919.95	3.2898	0.75815
1957	0.00146127	15.7	3.286	4.348	0	4.348	13.5593	18.4232	47.9034	36.842	50	20	0	20	70	0	461.498	1911.73	3.21453	0
1958	0.000772106	42.7	3	3.03	15.152	3.03	5.6338	16.9605	142.468	5.263	91.67	8.33	0	8.33	0	0	476.28	1877.47	3.25882	0.379075
1959	0.000801038	63.7	3.188	1.961	19.608	9.804	0	14.8398	187.257	0	100	20	0	0	0	0	681.93	1707.69	3.49423	2.27445
1960	0.00122814	9.8	3	0	25	0	15.4412	20.354	32.5697	56.693	50	0	0	0	0	0.27	731.848	1687.64	3.51632	0
1961	0.000384357	0	0	0	0	0	0	0	0	0	100	0	0	0	0	0.29	731.848	1734.05	3.46247	0
1962	0.0029567	12.2	3	2.778	22.222	0	0	94.1102	40.5858	0	66.67	0	0	0	0	0.19	654.585	1795.11	3.39292	0.75815
1963	0.0029886	14.4	3.583	0	23.256	0	0	15.713	40.1526	50	80	0	0	0	0	0	689.282	1780.66	3.40198	2.27445
1964	0.00507006	30.4	3.422	3.896	22.727	0	21.875	8.65054	84.8116	51.852	95.24	0	0	2.38	0	0	682.853	1813.27	3.37915	1.89538
1965	0.00354763	36.6	3.333	6.154	21.538	1.538	10.8108	54.4331	93.0198	25	71.43	48.57	0	22.86	0	0	569.106	1921.59	3.38082	3.0326
1966	0.00212358	15.1	4	0	15.625	0	20.3125	17.0962	32.9633	63.158	75	0	0	0	0	0	638.997	1925.19	3.34141	0.75815
1967	0.0013198	53.8	3.381	0	21.127	5.634	16.3265	13.0297	151.538	53.333	95.24	52.38	0	19.05	0	0	607.659	2004.41	3.32043	4.16983
1968	0.000932901	43.9	3.727	0	21.951	2.439	0	15.9476	96.4733	0	90	30	0	10	0	0	533.68	2000.94	3.38041	0.379075
1969	0.00106108	42.4	3.214	2.222	26.667	6.667	0	15.4853	131.941	0	100	43.75	0	6.25	0	0	496.998	1984.5	3.42211	0
1970	0.00193712	34.6	3.35	2.985	19.403	1.493	20.9302	13.3555	98.0836	25	90	25	0	15	0	0	498.264	1952.81	3.42031	0
1971	0.00346275	30.3	3.088	5.714	16.19	2.857	2.7027	10.7918	77.9727	10	55.56	59.26	0	62.96	0	0	572.418	1889.51	3.38807	1.89538
1972	0.00717717	17.3	3.444	0.806	17.742	2.419	0	102.03	45.9791	0	52.08	43.75	0	37.5	0	0.15	502.044	1921.26	3.41497	0
1973	0.00189083	0	0	0	0	0	24.1379	0	0	31.579	0	0	0	0	0	0	427.475	1986.09	3.43591	0
1974	0.00608817	7.4	3	13.333	17.778	0	11.25	15.4853	22.9954	58.333	40.91	45.45	0	31.82	0	0.46	354.998	2051.94	3.43294	1.13723
1975	0.00193693	0	0	0	0	0	0	0	0	0	100	25	0	50	0	0	392.109	2065.41	3.41463	0
1976	0.0114417	2.4	3.375	0	7.407	0	0	17.8088	6.99198	0	56.25	56.25	0	25	0	0	336.781	2162	3.35168	0
1977	2.26111e-05	0	0	0	0	0	0	0	0	0	0	0	0	0	0	0	286.209	2228.3	3.35168	0
1978	0.00173684	0	0	0	0	0	5.71429	0	0	25	0	0	0	0	0	0	286.209	2374.51	3.24532	0
1979	9.13453e-06	0	0	0	0	0	0	0	0	0	0	0	0	0	0	0	541.882	2492.58	3.11033	0
1980	9.13453e-06	0	0	0	0	0	15	0	0	0	0	0	0	0	0	0	561.302	2477.12	3.11033	0
1981	9.42102e-05	0	0	0	0	0	0	0	0	11.111	0	0	0	0	0	0	504.548	2413.21	3.08118	0
1982	0.000622355	0	0	0	0	0	26.3158	0	0	71.429	0	0	0	0	0	0	477.602	2381.4	3.11033	0
1983	0.00179061	12.3	3.143	0	18.182	0	8.69565	18.5834	39.0929	50	68.75	18.75	0	6.25	0	0.23	354.998	2272.27	3.25403	1.89538
1984	0.00162176	21.6	2.917	2.857	17.143	2.857	25	16.6954	73.9939	78.571	94.74	68.42	0	10.53	0	0	396.9	2207.28	3.29993	0.379075
1985	0.000526706	72.1	3.167	2.632	18.421	10.526	0	16.313	208.845	0	66.67	16.67	0	16.67	0	0	396.9	2207.28	3.28869	1.13723
1986	8.3664e-05	0	0	0	0	0	0	0	0	0	0	0	0	0	0	0	674.497	2156.45	3.16375	0
1987	0.000885018	21.5	3.167	5.263	15.789	0	0	19.0814	56.496	0	0	0	0	0	0	0	639.983	2110.97	3.16374	2.65353
1988	6.44806e-05	0	0	0	0	0	0	0	0	0	0	0	0	0	0	0	675.431	2189.8	3.16375	0
1989	0.000624614	0	0	0	0	0	9.09091	0	0	0	0	0	0	0	0	0	577.896	2415.03	3.05001	0
1990	0.000267818	0	0	0	0	0	0	0	0	0	0	0	0	0	0	0	604.541	2447.43	3.00797	0
1991	0.000485911	0	0	0	0	0	3.44828	0	0	8.333	0	0	0	0	0	0	604.541	2447.43	2.99034	0
1992	2.9109e-05	0	0	0	0	0	0	0	0	0	0	0	0	0	0	0	619.978	2603.86	3.11033	0
1993	0.00800715	17.1	3.425	5.109	20.438	1.46	5.88235	9.29004	43.7109	0	25	0	0	0	0	0	1059.06	1009.72	3.16954	1.5163
1994	0.00807362	19	3.732	1.307	22.876	0	14.5833	8.68571	47.0669	13.333	0	0	5	0	0	0	1051.3	1004.09	3.19113	0
1995	0.00329004	24.3	3.2	3.75	10	1.25	13.4615	12.3516	72.9473	7.143	0	0	0	0	13.64	0	1109.62	925.723	3.27012	1.5163
1996	0.001925	26	3.571	4	16	0	0	14.9437	72.7274	0	0	0	0	0	30.77	0	1105.64	923.678	3.27884	4.5489
1997	0.0140674	2.6	4	0	11.111	0	8	94.1102	6.39778	30.769	0	0	0	0	0	0	999.685	1030.11	3.23918	0.75815
1998	0.00291602	27.4	3.333	3.75	10	0	7.40741	12.3516	75.4453	37.5	0	0	0	0	25	0	854.95	1171.49	3.34791	3.0326
1999	0.00369578	17.6	3.611	3.077	9.231	1.538	10.9756	13.5246	43.2926	4.545	0	0	7.69	0	0	0.16	784.217	1242.49	3.35057	0.75815
[truncated: 4,738 more rows]
